# Supplementary material for: DFT studies on the mechanism of palladium catalyzed arylthiolation of unactive arene to diaryl sulfide
Source: Royal Society of Chemistry journal article supplement (doi:10.1039/c5ra27324b), 2016-01-01
Supplement: c5ra27324b1.pdf [file c5ra27324b1.pdf]

## Supplementary Information

# DFT Studies on the Mechanism of Palladium catalyzed Arylthiolation of Unactive Arene to Diaryl Sulfide

*Ya-ping Zhou, Mei-yan Wang\*, Sheng Fang, Yu Chen, Jing-yao Liu\**

Institute of Theoretical Chemistry, Jilin University, Changchun 130023, People's Republic of China.

E-mail address: [l jy121@jlu.edu.cn](mailto:l jy121@jlu.edu.cn) (J.L.); [mywang858@163.com](mailto:mywang858@163.com) (M.W.)

### Table of Contents

|                                                                          |             |
|--------------------------------------------------------------------------|-------------|
| IRC Calculation of TS <sub>12-14</sub> -----                             | Page S2     |
| The comparison of reactions of complex <b>14</b> with HTFA and HOAc----- | Page S2-S3  |
| Reaction pathways from intermediate <b>4'</b> -----                      | Page S3-S5  |
| Cartesian coordinates for all of the calculated structures -----         | Page S5-S98 |

## IRC Calculation of TS<sub>12-14</sub>

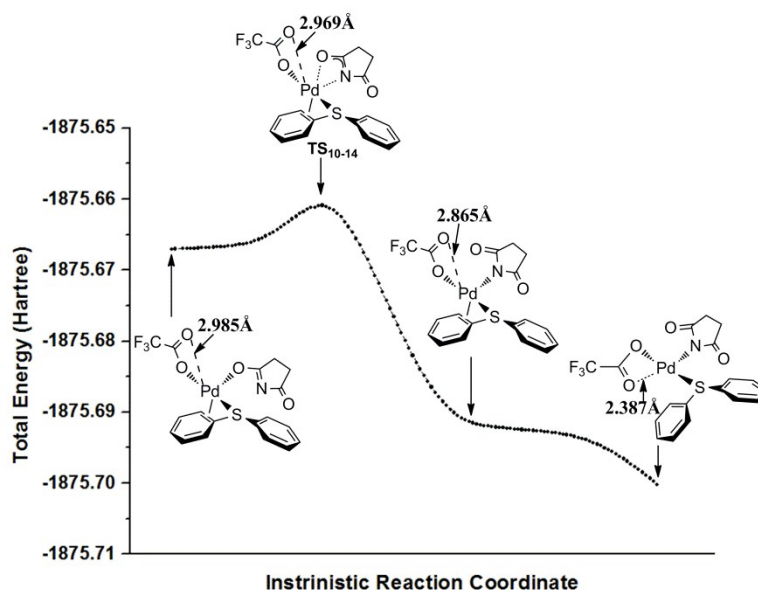

**Figure S1.** IRC Calculation for TS<sub>12-14</sub> to verify the formation of **14**. IRC calculation was carried out with a numerical integration step size of 0.3 amu<sup>1/2</sup> Bohr.

## The comparison of reactions of complex **14** with HTFA and HOAc

The reaction of complex **14** with HTFA has been described in the manuscript. In addition, the reaction of complex **14** with HOAc was also considered and shown in Figure S2. The ligand exchange of diaryl sulfide by HOAc proceeds through transition state TS<sub>14-15</sub> to form intermediate **15'** by releasing the product diaryl sulfide. From **15'**, N-H protonation transition state and corresponding intermediate similar to TS<sub>15-16</sub> and **16** cannot be located. Therefore, fixing N-H bond of 1.01 Å as in the optimized free pyrrolidine-2,5-dione, the fixed optimization gives structure **16'** which is higher than **15'** by 9.1 kcal/mol in electronic energy at the b3lyp level in gas phase. While TS<sub>15-16</sub> is 7.7 kcal/mol higher than **15'** in electronic energy, **16'** is higher than TS<sub>15-16</sub> by 1.4 kcal/mol. Thus, the pathway **14**→TS<sub>14-15</sub>→**15**→TS<sub>15-16</sub>→**16** is more favorable.

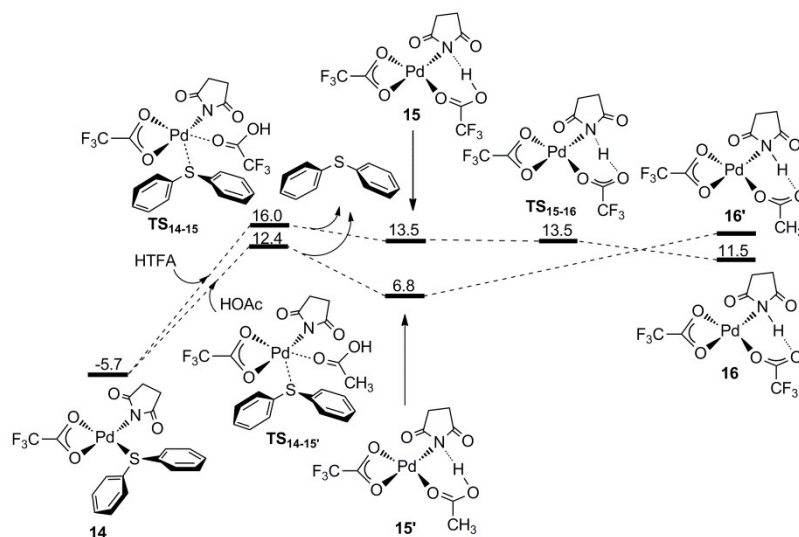

**Figure S2.** Gibbs energy profiles calculated for the reaction of intermediate **14** with HTFA and HOAc, respectively. The calculated relative free energies are given in kcal/mol.

### Reaction pathways from intermediate **4'**

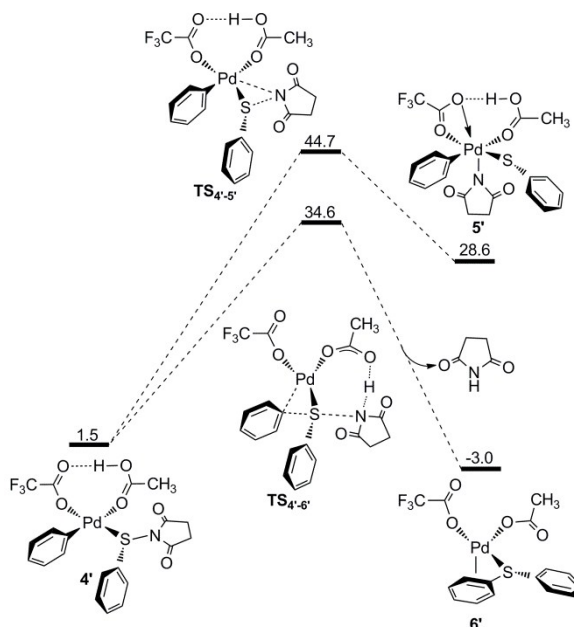

**Figure S3.** Gibbs energy profiles calculated for oxidative addition and concerted  $\sigma$ -bond metathesis giving intermediates **5'** and **6'**. The calculated relative free energies are given in kcal/mol.

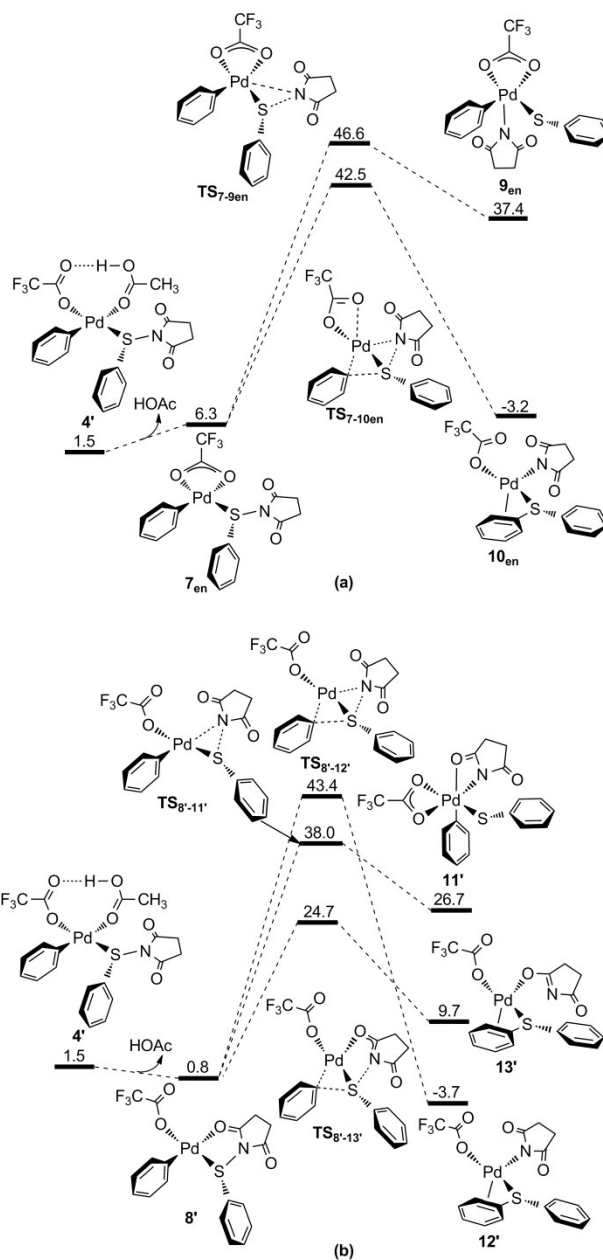

**Figure S4.** Gibbs energy profiles calculated for oxidative addition and  $\sigma$ -bond metathesis giving intermediates **9<sub>en</sub>**, **10<sub>en</sub>**, **11'**, **12'**, and **13'**. The calculated relative free energies are given in kcal/mol.

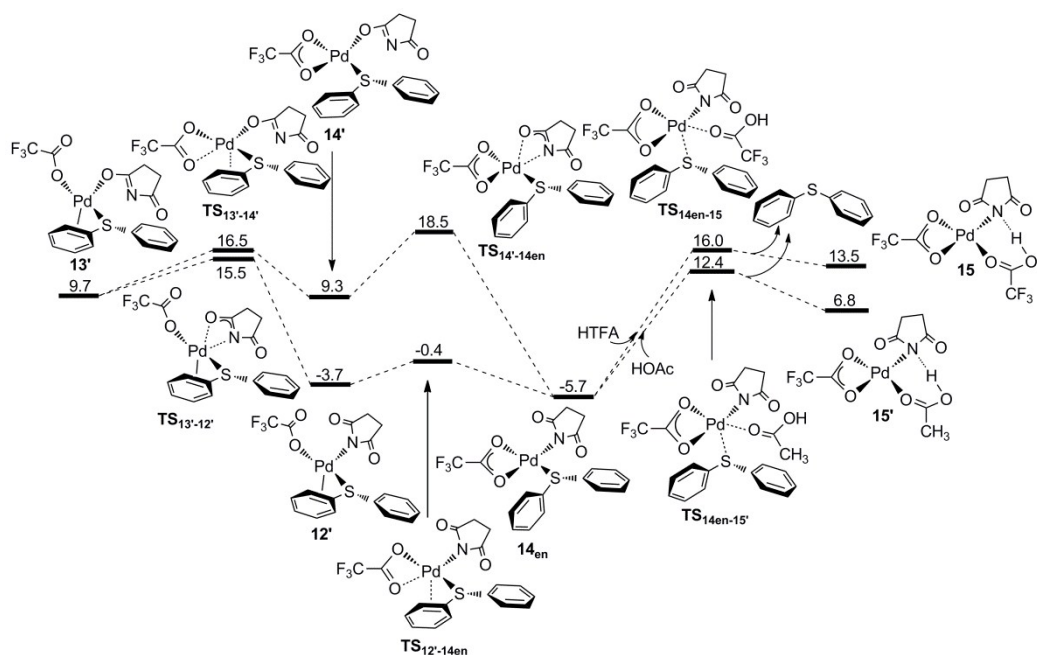

**Figure S5.** Gibbs energy profiles calculated for the isomerization reaction from **13'** to **15**. The calculated relative free energies are given in kcal/mol.

### Cartesian coordinates for all of the calculated structures

#### Pd(OAc)<sub>2</sub>

|    |             |             |             |
|----|-------------|-------------|-------------|
| Pd | 0.02128300  | 0.00422000  | 0.00865400  |
| O  | 1.77118700  | -1.03428500 | 0.34810400  |
| O  | 1.77766000  | 1.04576400  | -0.28475700 |
| O  | -1.73507200 | -1.03733500 | 0.30200500  |
| C  | 2.44986700  | 0.00455000  | 0.03485100  |
| C  | -2.40729100 | 0.00389500  | -0.01760700 |
| C  | -3.90238400 | 0.01437900  | 0.00361200  |
| H  | -4.28724500 | -0.97606400 | -0.24664600 |
| H  | -4.24171500 | 0.27005900  | 1.01329100  |
| H  | -4.28265900 | 0.76524900  | -0.69104300 |
| C  | 3.94496000  | -0.00602700 | 0.01360200  |
| H  | 4.28426800  | -0.26238700 | -0.99590600 |
| H  | 4.32517700  | -0.75647600 | 0.70874700  |
| H  | 4.32991100  | 0.98453800  | 0.26324800  |

|   |             |            |             |
|---|-------------|------------|-------------|
| O | -1.72863300 | 1.04272500 | -0.33084100 |
|---|-------------|------------|-------------|

**Pd(TFA)<sub>2</sub>**

|    |             |             |             |
|----|-------------|-------------|-------------|
| Pd | 0.01590300  | 0.01430200  | -0.04858800 |
| O  | 1.77590700  | 1.05106300  | 0.29071700  |
| O  | 1.77452100  | -1.02194300 | -0.39662800 |
| O  | -1.74256300 | 1.05110600  | 0.29898000  |
| O  | -1.74424800 | -1.02190700 | -0.38835100 |
| C  | 3.95530400  | -0.01415000 | 0.02430100  |
| C  | 2.42187600  | 0.01149200  | -0.04503400 |
| F  | 4.44822900  | -0.82637900 | -0.91500200 |
| F  | 4.32677900  | -0.46850700 | 1.23246600  |
| F  | 4.44889800  | 1.21468000  | -0.14817800 |
| C  | -2.39001700 | 0.01138100  | -0.03336400 |
| C  | -3.92303100 | -0.01466300 | 0.04436500  |
| F  | -4.41791400 | 1.21383800  | -0.12661700 |
| F  | -4.28771400 | -0.46793000 | 1.25499700  |
| F  | -4.42089100 | -0.82798900 | -0.89141100 |

**HOAc**

|   |             |             |             |
|---|-------------|-------------|-------------|
| C | -1.39677000 | -0.11174600 | -0.00000900 |
| C | 0.09237400  | 0.12502900  | 0.00021000  |
| O | 0.64263500  | 1.20296100  | -0.00024200 |
| O | 0.78054700  | -1.04499800 | 0.00009500  |
| H | 1.72160300  | -0.80095700 | -0.00002500 |
| H | -1.68215900 | -0.69278900 | 0.88154100  |
| H | -1.68174700 | -0.69452800 | -0.88053300 |
| H | -1.91677900 | 0.84487200  | -0.00102100 |

**HTFA**

|   |             |             |             |
|---|-------------|-------------|-------------|
| C | -0.60076300 | -0.00068300 | -0.00008700 |
| F | -0.99713600 | -0.67855400 | 1.09117000  |
| F | -0.99704400 | -0.68093700 | -1.08969500 |

|   |             |             |             |
|---|-------------|-------------|-------------|
| F | -1.18825200 | 1.19600800  | -0.00136000 |
| C | 0.93497700  | 0.15959900  | -0.00001900 |
| O | 1.49767600  | 1.22230400  | -0.00000800 |
| O | 1.52154000  | -1.04552400 | -0.00004200 |
| H | 2.48288500  | -0.89639300 | -0.00000100 |

**Pd(TFA)<sub>2</sub>(HOAc)<sub>2</sub> 1**

|    |             |             |             |
|----|-------------|-------------|-------------|
| Pd | -0.92891300 | -0.87831700 | 0.00831000  |
| C  | 2.94961100  | -1.49246900 | 1.81535200  |
| C  | 1.54023000  | -0.99813600 | 1.66129000  |
| O  | 1.05459400  | -0.88184200 | 0.51189100  |
| O  | 0.91483900  | -0.74201400 | 2.76905600  |
| H  | 0.03062400  | -0.24061100 | 2.63695000  |
| O  | -1.20968400 | 1.09094600  | 0.35015700  |
| O  | -1.07209400 | 0.88204200  | 2.60608500  |
| C  | -1.89418200 | 2.92904400  | 1.65171300  |
| C  | -1.32617500 | 1.49090800  | 1.55883700  |
| F  | -1.80942900 | 3.40929800  | 2.89538600  |
| F  | -3.19222800 | 2.92045400  | 1.28587800  |
| F  | -1.23158300 | 3.75901400  | 0.82878300  |
| O  | -0.76542800 | -2.64442900 | -2.58793500 |
| O  | -0.64789500 | -2.84806900 | -0.33053600 |
| C  | 0.04654800  | -4.69023200 | -1.61680800 |
| C  | -0.51745600 | -3.24974700 | -1.53733100 |
| F  | -0.70729900 | -5.53156500 | -0.88780600 |
| F  | 1.30031400  | -4.71227600 | -1.12200400 |
| F  | 0.08194700  | -5.13551100 | -2.87551700 |
| C  | -4.81036900 | -0.29776700 | -1.81203400 |
| C  | -3.39611800 | -0.77549300 | -1.64953400 |
| O  | -2.91120400 | -0.87550000 | -0.49854700 |
| O  | -2.76775700 | -1.03757900 | -2.75447900 |
| H  | -1.87943100 | -1.53035200 | -2.61942700 |

|   |             |             |             |
|---|-------------|-------------|-------------|
| H | -4.78456900 | 0.74896600  | -2.13813900 |
| H | -5.32122700 | -0.87786600 | -2.58414900 |
| H | -5.33992200 | -0.35826300 | -0.86096800 |
| H | 3.49465000  | -1.37101200 | 0.87868900  |
| H | 3.45084700  | -0.97083200 | 2.63356600  |
| H | 2.91277200  | -2.56010800 | 2.06394700  |

**Pd(TFA)<sub>2</sub>(HTFA)<sub>2</sub>**

|    |             |             |             |
|----|-------------|-------------|-------------|
| Pd | -0.92756600 | -0.88797800 | 0.01021900  |
| C  | 2.89720500  | -1.58350400 | 1.98478100  |
| F  | 2.92745200  | -2.49641100 | 2.96104900  |
| F  | 3.66495600  | -0.54064600 | 2.33651100  |
| F  | 3.37678700  | -2.12065100 | 0.86480300  |
| C  | 1.44778000  | -1.08464600 | 1.77969100  |
| O  | 1.02644800  | -1.00881000 | 0.61143900  |
| O  | 0.85013800  | -0.77691500 | 2.86888100  |
| H  | -0.03347200 | -0.21080800 | 2.73892000  |
| O  | -1.15654200 | 1.06778400  | 0.43513200  |
| O  | -1.04633300 | 0.83415800  | 2.69055300  |
| C  | -1.87426800 | 2.88672000  | 1.75310300  |
| C  | -1.29247400 | 1.45469400  | 1.64357900  |
| F  | -1.76809500 | 3.35778400  | 2.99699500  |
| F  | -3.17536600 | 2.85831300  | 1.41134200  |
| F  | -1.23298700 | 3.72067200  | 0.92053400  |
| O  | -0.81170000 | -2.61027200 | -2.67012100 |
| O  | -0.69861900 | -2.84370100 | -0.41479300 |
| C  | 0.01621200  | -4.66318400 | -1.73385100 |
| C  | -0.56468100 | -3.23085700 | -1.62338400 |
| F  | 1.31908900  | -4.63456300 | -1.39899500 |
| F  | -0.09653100 | -5.13579800 | -2.97661000 |
| F  | -0.62078200 | -5.49602700 | -0.89693400 |
| C  | -4.75317300 | -0.19096300 | -1.96214900 |



|   |             |             |             |
|---|-------------|-------------|-------------|
| F | -5.52186000 | -1.23401400 | -2.31137600 |
| F | -4.78445200 | 0.72062000  | -2.93958400 |
| F | -5.23090400 | 0.34783900  | -0.84217500 |
| C | -3.30374600 | -0.69029500 | -1.75832200 |
| O | -2.88180000 | -0.76702800 | -0.59035400 |
| O | -2.70675400 | -0.99764000 | -2.84797900 |
| H | -1.82358200 | -1.56445300 | -2.71841400 |

**Benzene**

|   |             |             |             |
|---|-------------|-------------|-------------|
| C | -1.82464500 | -1.72791400 | 0.00007400  |
| C | -0.42836400 | -1.72794500 | 0.00058400  |
| C | 0.26977800  | -0.51896700 | -0.00009000 |
| C | -0.42833600 | 0.69028100  | -0.00102200 |
| C | -1.82441300 | 0.69031000  | -0.00141700 |
| C | -2.52265900 | -0.51883800 | -0.00098500 |
| H | -2.36764200 | -2.66848700 | 0.00043600  |
| H | 0.11451100  | -2.66859900 | 0.00137400  |
| H | 1.35583100  | -0.51886700 | 0.00016400  |
| H | 0.11489500  | 1.63071200  | -0.00145100 |
| H | -2.36750400 | 1.63083200  | -0.00224200 |
| H | -3.60871900 | -0.51867100 | -0.00133500 |

**1-(phenylthio) pyrrolidine-2,5-dione**

|   |            |             |             |
|---|------------|-------------|-------------|
| C | 3.00714800 | 0.83060000  | -1.02587300 |
| C | 3.02358000 | -0.70328400 | -1.10186700 |
| C | 1.90915400 | -1.17565000 | -0.17237200 |
| C | 1.87449000 | 1.18460300  | -0.06667600 |
| H | 3.93547000 | 1.25719900  | -0.63525800 |
| H | 2.81210500 | 1.31499100  | -1.98643200 |
| H | 3.96503000 | -1.14761800 | -0.76687700 |
| H | 2.82510000 | -1.09274500 | -2.10417400 |
| N | 1.32758600 | -0.02670500 | 0.40710300  |
| S | 0.05534200 | -0.09712200 | 1.58595300  |

|          |             |             |             |
|----------|-------------|-------------|-------------|
| C        | -1.40290600 | -0.03208900 | 0.54190300  |
| C        | -2.03370900 | -1.22231600 | 0.15761400  |
| C        | -1.93107800 | 1.20785100  | 0.15787900  |
| C        | -3.19574200 | -1.16832700 | -0.61289500 |
| H        | -1.60619800 | -2.17353900 | 0.45639900  |
| C        | -3.09020600 | 1.25127300  | -0.61680400 |
| H        | -1.42465600 | 2.11870000  | 0.45879800  |
| C        | -3.72267700 | 0.06585400  | -0.99904800 |
| H        | -3.68751300 | -2.08903700 | -0.91244600 |
| H        | -3.50127800 | 2.21003400  | -0.91870100 |
| H        | -4.62786300 | 0.10430500  | -1.59818000 |
| O        | 1.49506000  | 2.29037800  | 0.23794800  |
| O        | 1.56780400  | -2.31444100 | 0.03839200  |
| <b>2</b> |             |             |             |
| Pd       | -0.01043900 | -0.02237800 | -0.20227700 |
| C        | 1.85354300  | -1.86059600 | 3.19257400  |
| C        | 1.14412800  | -0.76567900 | 2.45220200  |
| O        | 1.41317400  | -0.56609900 | 1.24538800  |
| O        | 0.26395100  | -0.08942500 | 3.12779000  |
| H        | -0.05609300 | 0.73365300  | 2.61271400  |
| O        | 0.42927700  | 1.94846600  | -0.11132000 |
| O        | -0.29320900 | 2.15173900  | 2.03354600  |
| C        | 0.34611200  | 4.11435700  | 0.82361600  |
| C        | 0.14773400  | 2.58330500  | 0.95920700  |
| F        | 0.54417900  | 4.68326700  | 2.01703900  |
| F        | -0.76687900 | 4.65592400  | 0.27765100  |
| F        | 1.38497100  | 4.41413300  | 0.03067800  |
| O        | 0.94696100  | -2.53434100 | -1.83086100 |
| O        | -0.48819700 | -1.96572900 | -0.16108100 |
| C        | 0.01467300  | -4.24402900 | -0.40581600 |
| C        | 0.20781000  | -2.78488300 | -0.89522500 |

|                         |             |             |             |
|-------------------------|-------------|-------------|-------------|
| F                       | -1.28807800 | -4.55207700 | -0.26864700 |
| F                       | 0.60458600  | -4.39642000 | 0.80540500  |
| F                       | 0.56813900  | -5.12058700 | -1.24773100 |
| H                       | 2.92510000  | -1.79917400 | 2.98897500  |
| H                       | 1.65938400  | -1.80677500 | 4.26312000  |
| H                       | 1.49917400  | -2.81641600 | 2.79241800  |
| C                       | -2.57307400 | 1.52430400  | -1.19050900 |
| C                       | -1.96711700 | 0.26225200  | -1.42621800 |
| C                       | -0.91053000 | 0.15731400  | -2.37233000 |
| C                       | -0.47048200 | 1.31618700  | -3.05599200 |
| C                       | -1.07107700 | 2.53516000  | -2.80533000 |
| C                       | -2.12538700 | 2.64076900  | -1.86952200 |
| H                       | -3.39684200 | 1.59608800  | -0.48742500 |
| H                       | -2.42932600 | -0.63726700 | -1.03200000 |
| H                       | -0.53235300 | -0.81423900 | -2.67397700 |
| H                       | 0.32897000  | 1.23087800  | -3.78465700 |
| H                       | -0.73788100 | 3.42297800  | -3.33418400 |
| H                       | -2.58436300 | 3.60735900  | -1.68894700 |
| <b>TS<sub>2-3</sub></b> |             |             |             |
| Pd                      | -0.06983100 | -0.64287600 | -0.23040000 |
| C                       | 2.46120300  | -2.30072600 | 2.98736200  |
| C                       | 1.34745300  | -1.53738300 | 2.32586800  |
| O                       | 1.47655600  | -1.11181000 | 1.16243700  |
| O                       | 0.28839000  | -1.37187400 | 3.06807800  |
| H                       | -0.35855900 | -0.67931100 | 2.68790300  |
| O                       | -0.31100100 | 1.25776100  | 0.43890800  |
| O                       | -1.19653000 | 0.60189500  | 2.42479200  |
| C                       | -1.22166100 | 2.92455900  | 1.83476400  |
| C                       | -0.87321000 | 1.43853600  | 1.56855000  |
| F                       | -1.40295900 | 3.15543000  | 3.14060500  |
| F                       | -2.36615300 | 3.23371400  | 1.18881200  |

|          |             |             |             |
|----------|-------------|-------------|-------------|
| F        | -0.25661600 | 3.74524900  | 1.39067600  |
| O        | -1.18578400 | -2.51999100 | -2.58872800 |
| O        | 0.28590800  | -2.55514900 | -0.87964800 |
| C        | 0.09571300  | -4.51758300 | -2.18848900 |
| C        | -0.31028300 | -3.06087800 | -1.86564000 |
| F        | -0.24569900 | -5.31308900 | -1.16024200 |
| F        | 1.42403400  | -4.59221300 | -2.36382100 |
| F        | -0.50782100 | -4.96372600 | -3.29266000 |
| H        | 2.07881400  | -3.26401500 | 3.33699900  |
| H        | 3.28233600  | -2.45247100 | 2.28870900  |
| H        | 2.80793000  | -1.74926500 | 3.86627300  |
| C        | -3.74568300 | 0.97446500  | -1.53348400 |
| C        | -2.86986600 | -0.01504000 | -1.09890800 |
| C        | -1.55194700 | -0.10700100 | -1.61778800 |
| C        | -1.15325800 | 0.84987900  | -2.58649700 |
| C        | -2.02985400 | 1.83660700  | -3.02529600 |
| C        | -3.32163900 | 1.90156200  | -2.49195600 |
| H        | -4.75289000 | 1.02939600  | -1.13136600 |
| H        | -3.20449500 | -0.74050100 | -0.36189900 |
| H        | -1.35472700 | -1.32979200 | -2.09959200 |
| H        | -0.15086200 | 0.79956200  | -3.00362600 |
| H        | -1.71351900 | 2.55672700  | -3.77403500 |
| H        | -4.00438000 | 2.67672300  | -2.82892800 |
| <b>3</b> |             |             |             |
| Pd       | 0.29324000  | 0.09783500  | 0.18223200  |
| C        | 2.03762100  | -1.76300800 | 3.88660600  |
| C        | 1.31150200  | -0.77352300 | 3.01499800  |
| O        | 1.55590600  | -0.68705300 | 1.80041300  |
| O        | 0.44105900  | -0.03821500 | 3.65472300  |
| H        | 0.09830600  | 0.74278500  | 3.09727900  |
| O        | 0.71337700  | 2.06361400  | 0.46460900  |

|           |             |             |             |
|-----------|-------------|-------------|-------------|
| O         | -0.23892200 | 2.15583900  | 2.52655600  |
| C         | 0.51748600  | 4.17627900  | 1.47062600  |
| C         | 0.30026700  | 2.64281300  | 1.52351600  |
| F         | 0.22283900  | 4.75717600  | 2.63916000  |
| F         | -0.26952700 | 4.71700400  | 0.51953200  |
| F         | 1.79698200  | 4.46457400  | 1.16792500  |
| O         | -0.15747900 | -1.95529700 | -2.47697200 |
| O         | -0.04641000 | -1.94931600 | -0.20648000 |
| C         | -0.14020600 | -4.05050700 | -1.36833500 |
| C         | -0.10384100 | -2.50978100 | -1.29735000 |
| F         | 0.11070000  | -4.57853700 | -0.17175700 |
| F         | 0.77129300  | -4.49013600 | -2.24493200 |
| F         | -1.35822700 | -4.44135400 | -1.77447300 |
| H         | 2.63870900  | -2.43498400 | 3.27571200  |
| H         | 2.68222200  | -1.22095700 | 4.58569200  |
| H         | 1.31600200  | -2.32859800 | 4.48198700  |
| C         | -3.05596500 | 0.84973800  | -2.34537200 |
| C         | -2.23941300 | 0.42381400  | -1.29382300 |
| C         | -0.85918800 | 0.69229100  | -1.31467400 |
| C         | -0.31571600 | 1.39658300  | -2.40223000 |
| C         | -1.13883000 | 1.80778800  | -3.45934500 |
| C         | -2.50695200 | 1.53768600  | -3.43075200 |
| H         | -4.12255800 | 0.64405900  | -2.31352700 |
| H         | -2.68199000 | -0.10602800 | -0.45418400 |
| H         | -0.24352100 | -0.97020700 | -2.37938400 |
| H         | 0.74151800  | 1.64627900  | -2.41376300 |
| H         | -0.70590000 | 2.34988400  | -4.29563200 |
| H         | -3.14428700 | 1.86403100  | -4.24728600 |
| <b>2'</b> |             |             |             |
| Pd        | 0.09034900  | 0.42547200  | -0.22690400 |
| O         | -1.79345900 | 0.02170500  | -0.71103100 |

|                          |             |             |             |
|--------------------------|-------------|-------------|-------------|
| O                        | -2.34375500 | -0.29314400 | 1.46877700  |
| O                        | 1.10791600  | -1.47751600 | -0.33290600 |
| O                        | 2.14700000  | 0.41302000  | 0.09338000  |
| C                        | -3.97694500 | -0.72636300 | -0.26127400 |
| C                        | -2.58125400 | -0.31198600 | 0.27402600  |
| F                        | -3.87430400 | -1.68885700 | -1.19355500 |
| F                        | -4.58348200 | 0.34080400  | -0.82566300 |
| F                        | -4.75562600 | -1.17520400 | 0.72727700  |
| C                        | 2.16823500  | -0.85165200 | -0.06131600 |
| C                        | 3.49154200  | -1.60453800 | 0.14065200  |
| F                        | 3.68152800  | -1.81231700 | 1.45569600  |
| F                        | 4.51681600  | -0.88063800 | -0.32946500 |
| F                        | 3.46839700  | -2.78475600 | -0.48333400 |
| C                        | 0.42854800  | 2.87756200  | 1.58657100  |
| C                        | 1.56096900  | 3.48991100  | 1.08402200  |
| C                        | 1.71718500  | 3.68381400  | -0.30804200 |
| C                        | 0.73975700  | 3.26477500  | -1.19065500 |
| C                        | -0.42678600 | 2.62187900  | -0.70020800 |
| C                        | -0.58568400 | 2.42999900  | 0.70139200  |
| H                        | 0.29672000  | 2.74216300  | 2.65497900  |
| H                        | 2.33791500  | 3.83256800  | 1.76039900  |
| H                        | 2.61146400  | 4.17308300  | -0.68146500 |
| H                        | 0.84741200  | 3.43155200  | -2.25754800 |
| H                        | -1.26009200 | 2.42709900  | -1.36757600 |
| H                        | -1.52899900 | 2.08117800  | 1.10726200  |
| <b>TS<sub>2-3</sub>'</b> |             |             |             |
| Pd                       | 0.16761700  | -0.36992700 | -0.05832800 |
| O                        | -1.77087500 | -0.98469100 | -0.01901400 |
| O                        | -2.67745300 | 1.04098200  | 0.38195300  |
| O                        | 1.29650000  | -2.23067500 | -0.33864600 |
| O                        | 2.23452400  | -0.24083100 | -0.16035500 |

|           |             |             |             |
|-----------|-------------|-------------|-------------|
| C         | -4.12621900 | -0.87471500 | 0.20135200  |
| C         | -2.73424300 | -0.19958800 | 0.19094500  |
| F         | -4.15124600 | -1.84224200 | 1.12971900  |
| F         | -4.36574200 | -1.42313100 | -1.00005900 |
| F         | -5.09304200 | 0.00550700  | 0.47195000  |
| C         | 2.32351000  | -1.50507600 | -0.30291000 |
| C         | 3.72468900  | -2.13214600 | -0.37909300 |
| F         | 4.21298900  | -2.27462500 | 0.86758000  |
| F         | 4.55819600  | -1.34574100 | -1.07439900 |
| F         | 3.67839500  | -3.33487900 | -0.95974300 |
| C         | 0.33443000  | 2.21155200  | 1.42079300  |
| C         | 0.96852200  | 3.44851400  | 1.47527800  |
| C         | 1.15697300  | 4.18307000  | 0.29925100  |
| C         | 0.70098400  | 3.69339300  | -0.92956900 |
| C         | 0.06512400  | 2.45718700  | -0.98528100 |
| C         | -0.13785400 | 1.68798800  | 0.18958200  |
| H         | 0.18054200  | 1.64593600  | 2.33592800  |
| H         | 1.31675100  | 3.84310800  | 2.42510700  |
| H         | 1.65651200  | 5.14695400  | 0.34181200  |
| H         | 0.84314300  | 4.27665800  | -1.83442100 |
| H         | -0.29951300 | 2.08326400  | -1.93841100 |
| H         | -1.40985300 | 1.34770000  | 0.29634900  |
| <b>3'</b> |             |             |             |
| Pd        | 0.43343400  | -0.13692900 | -0.26112500 |
| O         | -1.63565000 | -0.31560800 | -0.56339000 |
| O         | -2.37423000 | 1.11610800  | 1.03707600  |
| O         | 1.38133600  | -2.22746500 | -0.39506900 |
| O         | 2.45614700  | -0.34384000 | 0.06889300  |
| C         | -3.98863700 | -0.22860400 | -0.06759900 |
| C         | -2.51753400 | 0.19456700  | 0.12426500  |
| F         | -4.06632000 | -1.30107000 | -0.85037300 |

|          |             |             |             |
|----------|-------------|-------------|-------------|
| F        | -4.65834000 | 0.78496300  | -0.63812300 |
| F        | -4.54319900 | -0.50259400 | 1.11903700  |
| C        | 2.43276000  | -1.60965900 | -0.12480900 |
| C        | 3.78023400  | -2.34401800 | -0.01032800 |
| F        | 4.31448500  | -2.13800600 | 1.20721300  |
| F        | 4.63889200  | -1.87555700 | -0.93325000 |
| F        | 3.63305200  | -3.65961200 | -0.19350400 |
| C        | 0.91747900  | 2.40920900  | 1.11348300  |
| C        | 0.89566400  | 3.80091300  | 1.26765600  |
| C        | 0.31608400  | 4.60875700  | 0.28865100  |
| C        | -0.24985200 | 4.02658500  | -0.84809200 |
| C        | -0.24538000 | 2.63726600  | -1.00560300 |
| C        | 0.34004400  | 1.82081900  | -0.02307500 |
| H        | 1.40246500  | 1.79015100  | 1.86277100  |
| H        | 1.34329600  | 4.24801100  | 2.15094300  |
| H        | 0.30726000  | 5.68802000  | 0.40855200  |
| H        | -0.69576700 | 4.65144700  | -1.61710900 |
| H        | -0.68585500 | 2.19708800  | -1.89638800 |
| H        | -1.43685900 | 1.43944900  | 1.03080300  |
| <b>4</b> |             |             |             |
| Pd       | -0.08668900 | 0.20002400  | -0.90278700 |
| C        | 4.34535100  | -0.63624400 | -1.56141100 |
| C        | 3.09289800  | 0.10391700  | -1.16435600 |
| O        | 1.98820400  | -0.25324600 | -1.60468800 |
| O        | 3.28136600  | 1.11348800  | -0.35826700 |
| H        | 2.45867700  | 1.74041700  | -0.30318800 |
| O        | 1.51218500  | 2.90193200  | -0.37515600 |
| O        | -0.15175800 | 2.11210500  | -1.70789400 |
| C        | 0.21761400  | 4.44566500  | -1.65368100 |
| C        | 0.58469400  | 3.00996000  | -1.20024000 |
| F        | -0.26437400 | 4.46937500  | -2.90596600 |



|   |             |             |             |
|---|-------------|-------------|-------------|
| F | -0.72960700 | 4.94091600  | -0.82983600 |
| F | 1.28197900  | 5.26167200  | -1.60159900 |
| H | 4.63150900  | -0.31225600 | -2.56790000 |
| H | 4.14558700  | -1.70879000 | -1.60313000 |
| H | 5.16831400  | -0.41377600 | -0.88115600 |
| C | -4.32856500 | 0.44488200  | -0.82358200 |
| C | -3.00887600 | 0.14983900  | -1.18615100 |
| C | -1.95636600 | 0.53287500  | -0.34932300 |
| C | -2.21971600 | 1.22347800  | 0.83821700  |
| C | -3.54206300 | 1.51623200  | 1.19118700  |
| C | -4.59755900 | 1.12585700  | 0.36450600  |
| H | -5.14304700 | 0.14590400  | -1.47857900 |
| H | -2.81332800 | -0.36590800 | -2.12262900 |
| H | -1.40515000 | 1.52801600  | 1.48853800  |
| H | -3.74193600 | 2.05629500  | 2.11341400  |
| H | -5.62239000 | 1.35759100  | 0.64077300  |
| C | 2.74724100  | -1.34791500 | 2.73706300  |
| C | 3.26785100  | -2.65927400 | 2.12982200  |
| C | 2.33163400  | -2.97618200 | 0.96888500  |
| C | 1.41495200  | -1.07859900 | 2.05151300  |
| H | 3.39904100  | -0.49490200 | 2.52114200  |
| H | 2.59859400  | -1.37941100 | 3.81875800  |
| H | 4.29305600  | -2.60394300 | 1.75629600  |
| H | 3.22666200  | -3.49776500 | 2.83236100  |
| N | 1.27342000  | -2.03412300 | 1.01876600  |
| S | 0.01800000  | -2.02844600 | -0.18784800 |
| C | -1.35945300 | -2.78053300 | 0.68425100  |
| C | -1.77212700 | -4.02979000 | 0.20410000  |
| C | -2.01063000 | -2.16681700 | 1.76128200  |
| C | -2.85449500 | -4.67074200 | 0.80868000  |
| H | -1.24846400 | -4.49259500 | -0.62635200 |

|                         |             |             |             |
|-------------------------|-------------|-------------|-------------|
| C                       | -3.08069500 | -2.82675300 | 2.36342100  |
| H                       | -1.68790700 | -1.19456700 | 2.11015400  |
| C                       | -3.50485700 | -4.07092400 | 1.88784500  |
| H                       | -3.18143400 | -5.63795800 | 0.43960100  |
| H                       | -3.59331000 | -2.35921700 | 3.19849900  |
| H                       | -4.34537600 | -4.57185900 | 2.35912900  |
| O                       | 0.61610200  | -0.20975800 | 2.30979000  |
| O                       | 2.43739500  | -3.85722100 | 0.15176400  |
| <b>TS<sub>4-5</sub></b> |             |             |             |
| Pd                      | 0.22586600  | 0.67201900  | -0.22708400 |
| C                       | 4.16721700  | -0.69454900 | -2.22315100 |
| C                       | 3.28325800  | 0.18937900  | -1.38836100 |
| O                       | 2.05387700  | 0.20544200  | -1.54030200 |
| O                       | 3.92104000  | 0.90127300  | -0.49007800 |
| H                       | 3.29729200  | 1.53887300  | -0.00273400 |
| O                       | 2.55999300  | 2.71819000  | 0.69913500  |
| O                       | 0.53337300  | 2.73664200  | -0.33062700 |
| C                       | 1.41705300  | 4.80100800  | 0.36454900  |
| C                       | 1.54387800  | 3.26089800  | 0.23442000  |
| F                       | 1.06792800  | 5.35734200  | -0.80912000 |
| F                       | 0.46419800  | 5.10193900  | 1.27077500  |
| F                       | 2.56559600  | 5.36149300  | 0.76674800  |
| H                       | 3.68479900  | -0.90669000 | -3.17754900 |
| H                       | 4.29274000  | -1.63470200 | -1.67619400 |
| H                       | 5.14824700  | -0.24063100 | -2.37179600 |
| C                       | -3.85717500 | 1.44122600  | -0.83249500 |
| C                       | -2.55272500 | 0.93320200  | -0.90058800 |
| C                       | -1.66993400 | 1.19021000  | 0.15302100  |
| C                       | -2.06306500 | 1.92579800  | 1.26842000  |
| C                       | -3.37293400 | 2.41749100  | 1.32103000  |
| C                       | -4.26876100 | 2.17846600  | 0.27695000  |

|          |             |             |             |
|----------|-------------|-------------|-------------|
| H        | -4.54459800 | 1.24692300  | -1.65139300 |
| H        | -2.24787300 | 0.35929800  | -1.76956900 |
| H        | -1.36947100 | 2.10873400  | 2.07775400  |
| H        | -3.68283100 | 3.00002800  | 2.18455200  |
| H        | -5.28199000 | 2.56640100  | 0.32770400  |
| C        | 2.39671200  | -0.19320200 | 3.57980700  |
| C        | 3.35483400  | -0.98682300 | 2.68423700  |
| C        | 2.55384200  | -1.26225200 | 1.40908300  |
| C        | 1.22335100  | 0.16594100  | 2.66526600  |
| H        | 2.81630300  | 0.72781900  | 3.99112700  |
| H        | 2.00832000  | -0.78135100 | 4.41772100  |
| H        | 4.23745100  | -0.40757200 | 2.39431400  |
| H        | 3.70230800  | -1.93387500 | 3.10354000  |
| N        | 1.40298500  | -0.47870100 | 1.44154800  |
| S        | -0.03362700 | -1.58817300 | -0.17786900 |
| C        | -0.99440900 | -2.35866300 | 1.07795600  |
| C        | -0.65850800 | -3.70501400 | 1.34177100  |
| C        | -2.06875900 | -1.75756900 | 1.76127400  |
| C        | -1.40069700 | -4.43961800 | 2.26084400  |
| H        | 0.18293700  | -4.15507900 | 0.82441900  |
| C        | -2.78966700 | -2.49986500 | 2.69153700  |
| H        | -2.32295000 | -0.72438300 | 1.56620100  |
| C        | -2.46462100 | -3.83776900 | 2.93944800  |
| H        | -1.14365500 | -5.47623100 | 2.45592000  |
| H        | -3.61452400 | -2.03347100 | 3.22146500  |
| H        | -3.03971800 | -4.40987400 | 3.66153700  |
| O        | 0.29611100  | 0.88943600  | 2.96669600  |
| O        | 2.88495800  | -2.03153100 | 0.52762200  |
| <b>5</b> |             |             |             |
| Pd       | 0.01294900  | -0.13138500 | -0.71776300 |
| C        | 3.74068800  | -1.91976100 | -2.33334600 |

|   |             |             |             |
|---|-------------|-------------|-------------|
| C | 2.94112800  | -0.76122500 | -1.80875200 |
| O | 1.73416300  | -0.63813500 | -2.08672100 |
| O | 3.59946100  | 0.06289400  | -1.03986900 |
| H | 3.03820200  | 0.88656700  | -0.79664000 |
| O | 2.42614500  | 2.25899100  | -0.54885900 |
| O | 0.24345400  | 1.92808100  | -1.09526600 |
| C | 1.05687200  | 4.13299500  | -1.13809900 |
| C | 1.28822800  | 2.62004800  | -0.88352500 |
| F | 0.95372200  | 4.34691100  | -2.46857800 |
| F | -0.07712500 | 4.55867000  | -0.56017900 |
| F | 2.07043300  | 4.87344000  | -0.67468500 |
| H | 3.34802800  | -2.23265200 | -3.30148400 |
| H | 3.61033100  | -2.74687300 | -1.62654800 |
| H | 4.80099100  | -1.67329900 | -2.39927300 |
| C | -3.79250200 | 1.48671800  | 0.01079400  |
| C | -2.52892400 | 1.17416700  | -0.50748300 |
| C | -1.71866300 | 0.29197200  | 0.20316200  |
| C | -2.10974700 | -0.25279700 | 1.42096500  |
| C | -3.36644300 | 0.08441200  | 1.93176100  |
| C | -4.20888700 | 0.94766700  | 1.22767000  |
| H | -4.43397400 | 2.17133000  | -0.53678300 |
| H | -2.18927500 | 1.63771600  | -1.42698700 |
| H | -1.46664100 | -0.93749300 | 1.96058200  |
| H | -3.68328700 | -0.33623500 | 2.88203900  |
| H | -5.18305600 | 1.20650200  | 1.63189800  |
| C | 2.09455700  | 0.47775700  | 3.03479200  |
| C | 2.58580000  | -0.92758000 | 2.66956100  |
| C | 1.85335300  | -1.28724400 | 1.37401300  |
| C | 1.06607600  | 0.83020800  | 1.95949600  |
| H | 2.88312100  | 1.23519000  | 3.00419100  |
| H | 1.61839200  | 0.54435400  | 4.01678200  |

|                         |             |             |             |
|-------------------------|-------------|-------------|-------------|
| H                       | 3.66092700  | -0.98510400 | 2.47908800  |
| H                       | 2.34822100  | -1.68744500 | 3.41998900  |
| N                       | 1.01902900  | -0.22962300 | 1.03864900  |
| S                       | -0.47847000 | -2.30441600 | -1.17537200 |
| C                       | -1.62495000 | -3.14723000 | -0.12843100 |
| C                       | -1.13368800 | -4.11923400 | 0.76393000  |
| C                       | -3.01293300 | -2.95406500 | -0.25681000 |
| C                       | -2.02298100 | -4.87814500 | 1.52185000  |
| H                       | -0.06123100 | -4.25773400 | 0.85479700  |
| C                       | -3.89327800 | -3.73320200 | 0.48935700  |
| H                       | -3.38742700 | -2.20063300 | -0.94117700 |
| C                       | -3.40139000 | -4.69099200 | 1.38158100  |
| H                       | -1.64200400 | -5.62300300 | 2.21435000  |
| H                       | -4.96408800 | -3.58930100 | 0.38051600  |
| H                       | -4.09228400 | -5.29207900 | 1.96567300  |
| O                       | 0.40821600  | 1.84548900  | 1.91848100  |
| O                       | 1.99538200  | -2.33328200 | 0.76538700  |
| <b>TS<sub>4-6</sub></b> |             |             |             |
| Pd                      | 0.02308900  | -0.00801200 | -0.07380200 |
| C                       | 4.50757100  | 0.00983300  | -0.10646800 |
| C                       | 3.11242400  | -0.54837300 | -0.06840300 |
| O                       | 2.13876500  | 0.15865300  | -0.35371700 |
| O                       | 3.05299300  | -1.80694500 | 0.30421900  |
| H                       | 2.13371800  | -2.20259700 | 0.26757700  |
| O                       | 0.05093700  | 2.03510900  | -0.32671400 |
| O                       | 0.54847800  | 2.10881000  | 1.88422100  |
| C                       | 0.44481200  | 4.15487800  | 0.61660000  |
| C                       | 0.34772900  | 2.61701100  | 0.78280400  |
| F                       | 1.41821100  | 4.47898500  | -0.25947500 |
| F                       | -0.71633400 | 4.66118100  | 0.15008100  |
| F                       | 0.71928000  | 4.76217800  | 1.78038900  |

|   |             |             |             |
|---|-------------|-------------|-------------|
| H | 4.84961800  | 0.16544700  | 0.92231200  |
| H | 4.51012800  | 0.96332700  | -0.63271300 |
| H | 5.18904300  | -0.70037700 | -0.57981300 |
| C | -3.94971000 | 0.27197400  | -1.22159000 |
| C | -2.72012300 | -0.35869900 | -1.06755200 |
| C | -2.04355700 | -0.30470600 | 0.17570800  |
| C | -2.64928300 | 0.35172700  | 1.27068800  |
| C | -3.88284500 | 0.97325600  | 1.10857600  |
| C | -4.52754000 | 0.93686600  | -0.13406600 |
| H | -4.46093900 | 0.24400100  | -2.17892400 |
| H | -2.27085000 | -0.89679800 | -1.89775300 |
| H | -2.14547000 | 0.38415700  | 2.23016600  |
| H | -4.34271100 | 1.49174700  | 1.94440900  |
| H | -5.49182400 | 1.42305700  | -0.25221000 |
| C | 1.56911600  | -5.69543900 | -0.22871400 |
| C | 1.37952000  | -5.08123900 | -1.62019700 |
| C | 0.81454000  | -3.68494300 | -1.34104400 |
| C | 1.20674100  | -4.56826200 | 0.75305100  |
| H | 2.58904200  | -6.03051100 | -0.02147700 |
| H | 0.90806200  | -6.54623900 | -0.03612000 |
| H | 2.31508800  | -4.97519100 | -2.17860000 |
| H | 0.68290200  | -5.62582000 | -2.26350500 |
| N | 0.84525900  | -3.42069800 | 0.02777500  |
| S | -0.84092800 | -2.03201600 | 0.40911400  |
| C | -0.83318600 | -2.19610700 | 2.19685700  |
| C | -1.51592600 | -3.29368200 | 2.73458900  |
| C | -0.18294300 | -1.27519200 | 3.02958700  |
| C | -1.54518100 | -3.47369400 | 4.11594100  |
| H | -2.00912200 | -4.00323700 | 2.07804400  |
| C | -0.21642600 | -1.47054300 | 4.41007300  |
| H | 0.31649900  | -0.40373300 | 2.61340300  |

|          |             |             |             |
|----------|-------------|-------------|-------------|
| C        | -0.89294800 | -2.56598000 | 4.95255600  |
| H        | -2.06968700 | -4.32615100 | 4.53620300  |
| H        | 0.28349900  | -0.75888600 | 5.05986200  |
| H        | -0.91382200 | -2.71034900 | 6.02868500  |
| O        | 1.24486900  | -4.65349000 | 1.96350100  |
| O        | 0.39655800  | -2.90434300 | -2.18159300 |
| <b>6</b> |             |             |             |
| Pd       | 0.05538900  | 0.95448700  | -0.30927500 |
| C        | 4.15259500  | -0.12934600 | -0.87827500 |
| C        | 2.68785200  | -0.26793800 | -0.47796100 |
| O        | 2.02665200  | 0.84330700  | -0.67112800 |
| O        | 2.23869000  | -1.32882300 | -0.03581900 |
| O        | 0.25228500  | 2.94577000  | -0.64877700 |
| O        | -0.57958500 | 3.37017500  | 1.42134100  |
| C        | 0.01679000  | 5.19996900  | -0.02712000 |
| C        | -0.12178100 | 3.69722800  | 0.33197800  |
| F        | 1.22312200  | 5.48105300  | -0.54837600 |
| F        | -0.92139300 | 5.53637500  | -0.94246500 |
| F        | -0.16411400 | 5.97763700  | 1.04931300  |
| H        | 4.69480600  | -1.03722200 | -0.61357400 |
| H        | 4.59570700  | 0.73817900  | -0.38281300 |
| H        | 4.21906300  | 0.04145900  | -1.95676900 |
| C        | -3.73246900 | 0.61181800  | -1.81063900 |
| C        | -2.78897300 | -0.35375900 | -1.49692700 |
| C        | -2.03357500 | -0.21919900 | -0.31228900 |
| C        | -2.22409500 | 0.89729300  | 0.54311900  |
| C        | -3.17552700 | 1.87440000  | 0.18088600  |
| C        | -3.91937100 | 1.73238100  | -0.97933800 |
| H        | -4.32495100 | 0.50611500  | -2.71439200 |
| H        | -2.62370400 | -1.20588100 | -2.14820400 |
| H        | -1.75310900 | 0.95687400  | 1.51875200  |

|    |             |             |             |
|----|-------------|-------------|-------------|
| H  | -3.30676000 | 2.73206300  | 0.83126100  |
| H  | -4.65265800 | 2.48537600  | -1.25001200 |
| S  | -0.59318800 | -1.26622900 | -0.06056900 |
| C  | -0.66866200 | -1.64333700 | 1.71051400  |
| C  | -1.86654600 | -2.13380000 | 2.24349300  |
| C  | 0.47889700  | -1.51842600 | 2.49761600  |
| C  | -1.91774200 | -2.47824600 | 3.59388500  |
| H  | -2.74748800 | -2.24290900 | 1.61883100  |
| C  | 0.41007900  | -1.87364900 | 3.84627600  |
| H  | 1.40246500  | -1.17245300 | 2.04951900  |
| C  | -0.78200600 | -2.34685900 | 4.39625800  |
| H  | -2.84573700 | -2.85269500 | 4.01527100  |
| H  | 1.29586000  | -1.77479800 | 4.46616500  |
| H  | -0.82672400 | -2.61664000 | 5.44700500  |
| 7  |             |             |             |
| Pd | -0.27784600 | 0.73737100  | -0.30635900 |
| O  | 0.12330300  | 2.76655200  | -0.84251300 |
| O  | 1.87402000  | 1.44249800  | -0.50083400 |
| C  | 2.30977400  | 3.76899800  | -0.97583800 |
| C  | 1.37414200  | 2.56383600  | -0.77350400 |
| F  | 3.48388800  | 3.38372700  | -1.50014700 |
| F  | 1.76472700  | 4.68748300  | -1.78432900 |
| F  | 2.55319800  | 4.34765600  | 0.21843900  |
| C  | -4.37881800 | -0.10371700 | -1.21395200 |
| C  | -2.98749900 | -0.22395900 | -1.11312200 |
| C  | -2.25403400 | 0.73581400  | -0.40551900 |
| C  | -2.91432000 | 1.81381200  | 0.19690900  |
| C  | -4.30514100 | 1.92122600  | 0.09726200  |
| C  | -5.03941200 | 0.96390100  | -0.60617800 |
| H  | -4.94032200 | -0.84835400 | -1.77225100 |
| H  | -2.49011500 | -1.05581700 | -1.60541200 |



|          |             |             |             |
|----------|-------------|-------------|-------------|
| H        | -2.35121800 | 2.57809000  | 0.72509200  |
| H        | -4.81093200 | 2.76178700  | 0.56528000  |
| H        | -6.11907300 | 1.05346300  | -0.68450100 |
| C        | 3.56785900  | -1.22425800 | 1.59842600  |
| C        | 3.69450600  | -2.40283200 | 0.61928600  |
| C        | 2.30191500  | -2.61603700 | 0.03744200  |
| C        | 2.08755400  | -0.87796800 | 1.64218900  |
| H        | 4.09523000  | -0.32950300 | 1.25408300  |
| H        | 3.91827400  | -1.44466200 | 2.60971100  |
| H        | 4.38852400  | -2.21635300 | -0.20420700 |
| H        | 4.00866600  | -3.33308600 | 1.10213200  |
| N        | 1.43988300  | -1.69588700 | 0.68351300  |
| S        | -0.21264200 | -1.51218300 | 0.19066000  |
| C        | -1.11584000 | -2.00974300 | 1.66443200  |
| C        | -1.49295400 | -3.35601500 | 1.74272600  |
| C        | -1.46346900 | -1.09810100 | 2.66640400  |
| C        | -2.21852500 | -3.79563100 | 2.85013600  |
| H        | -1.22339500 | -4.04479000 | 0.94810000  |
| C        | -2.19363900 | -1.55119100 | 3.76448900  |
| H        | -1.15616500 | -0.06288300 | 2.58562000  |
| C        | -2.56852500 | -2.89410900 | 3.85736400  |
| H        | -2.51550400 | -4.83752900 | 2.91987400  |
| H        | -2.46887900 | -0.85246900 | 4.54839700  |
| H        | -3.13881600 | -3.23763500 | 4.71536700  |
| O        | 1.53016900  | -0.06941100 | 2.34414100  |
| O        | 1.95778900  | -3.41118000 | -0.80182500 |
| <b>8</b> |             |             |             |
| Pd       | 0.22924800  | 0.18057800  | -0.73315400 |
| O        | 2.33585300  | -0.38673500 | 1.27370600  |
| O        | 2.27006000  | 0.23920100  | -0.90850900 |
| C        | 2.84593100  | -0.11586700 | 0.18788800  |

|   |             |             |             |
|---|-------------|-------------|-------------|
| C | 4.38626100  | -0.17869700 | 0.02843100  |
| F | 4.98543400  | -0.57903300 | 1.16002700  |
| F | 4.88285800  | 1.03227500  | -0.29671200 |
| F | 4.73052200  | -1.04329200 | -0.94891600 |
| C | 0.83426100  | 2.65067200  | 0.75632800  |
| C | 0.80718300  | 4.02920400  | 0.99135300  |
| C | 0.14930800  | 4.88704800  | 0.10733400  |
| C | -0.48647000 | 4.36317100  | -1.01837000 |
| C | -0.47142400 | 2.98405000  | -1.25999100 |
| C | 0.18931200  | 2.12836100  | -0.37034900 |
| H | 1.36407200  | 1.99173300  | 1.43659100  |
| H | 1.31231000  | 4.43040400  | 1.86627000  |
| H | 0.13604300  | 5.95728700  | 0.29301400  |
| H | -0.99670700 | 5.02262700  | -1.71581300 |
| H | -0.96582300 | 2.59208800  | -2.14477800 |
| C | -1.54054500 | -3.85264900 | -1.65745200 |
| C | -3.07734000 | -3.80562600 | -1.56109100 |
| C | -3.41836700 | -2.40422400 | -1.06503500 |
| C | -1.07619100 | -2.46819000 | -1.25153300 |
| H | -1.08407000 | -4.58253800 | -0.98235700 |
| H | -1.16781200 | -4.06799300 | -2.66258600 |
| H | -3.49288400 | -4.53482000 | -0.86056000 |
| H | -3.57482600 | -3.96301800 | -2.52222600 |
| N | -2.18907600 | -1.71135400 | -0.91534200 |
| S | -2.06808200 | -0.03399500 | -0.39406700 |
| C | -2.30211200 | -0.20049900 | 1.38564600  |
| C | -3.61390500 | -0.10347200 | 1.86845400  |
| C | -1.21369500 | -0.37982700 | 2.25094800  |
| C | -3.83790300 | -0.19963600 | 3.24149100  |
| H | -4.43954600 | 0.02870500  | 1.17768000  |
| C | -1.45894100 | -0.47372600 | 3.62143700  |

|                         |             |             |             |
|-------------------------|-------------|-------------|-------------|
| H                       | -0.19662500 | -0.42795000 | 1.86872900  |
| C                       | -2.76299900 | -0.38399500 | 4.11453600  |
| H                       | -4.85021100 | -0.12709200 | 3.62684700  |
| H                       | -0.62350500 | -0.60820100 | 4.30138000  |
| H                       | -2.94173100 | -0.45246500 | 5.18361500  |
| O                       | 0.07615200  | -2.05353800 | -1.22749600 |
| O                       | -4.50046200 | -1.93060000 | -0.82715200 |
| <b>TS<sub>7-9</sub></b> |             |             |             |
| Pd                      | -0.08142200 | 0.19429700  | -0.41095000 |
| O                       | 0.53157000  | 2.13734900  | -0.92188900 |
| O                       | 2.03829200  | 0.67529600  | -1.68310300 |
| C                       | 2.49860700  | 3.03296700  | -1.93962800 |
| C                       | 1.63052600  | 1.83423100  | -1.50648000 |
| F                       | 3.39813100  | 2.67752300  | -2.86594200 |
| F                       | 1.75129000  | 4.03183800  | -2.43571500 |
| F                       | 3.16805100  | 3.50466800  | -0.86398300 |
| C                       | -4.20935800 | 1.11849100  | -0.52953000 |
| C                       | -2.97459500 | 0.48908200  | -0.74017700 |
| C                       | -1.89120400 | 0.86532600  | 0.05720100  |
| C                       | -2.01078700 | 1.81789000  | 1.06793000  |
| C                       | -3.25586900 | 2.42459900  | 1.26655200  |
| C                       | -4.35157600 | 2.07882200  | 0.47128600  |
| H                       | -5.05630200 | 0.84252400  | -1.15186600 |
| H                       | -2.87465500 | -0.25906100 | -1.51848500 |
| H                       | -1.15813700 | 2.08017300  | 1.68296400  |
| H                       | -3.35958900 | 3.17635300  | 2.04423400  |
| H                       | -5.31328200 | 2.55662100  | 0.63321600  |
| C                       | 2.82406700  | -0.42306500 | 2.81125500  |
| C                       | 3.57080100  | -1.20145700 | 1.71710100  |
| C                       | 2.48640500  | -1.58736500 | 0.70448900  |
| C                       | 1.45758100  | -0.11098200 | 2.19523900  |

|          |             |             |             |
|----------|-------------|-------------|-------------|
| H        | 3.30331200  | 0.50972800  | 3.11719900  |
| H        | 2.66023900  | -1.01986400 | 3.71500100  |
| H        | 4.30329700  | -0.58003600 | 1.19167900  |
| H        | 4.08429900  | -2.10250700 | 2.05928400  |
| N        | 1.35340800  | -0.82174500 | 1.00426100  |
| S        | -0.43253000 | -2.01941800 | -0.06764700 |
| C        | -1.16901400 | -2.56099100 | 1.43581700  |
| C        | -0.92320700 | -3.91005200 | 1.77182100  |
| C        | -1.99570200 | -1.77074900 | 2.25715300  |
| C        | -1.51315600 | -4.46145800 | 2.90469100  |
| H        | -0.27247300 | -4.50804000 | 1.14147600  |
| C        | -2.56243700 | -2.33168700 | 3.39708200  |
| H        | -2.18142800 | -0.73538800 | 2.00359400  |
| C        | -2.32991500 | -3.67302100 | 3.72042700  |
| H        | -1.32821900 | -5.50110500 | 3.15661500  |
| H        | -3.19528000 | -1.72080300 | 4.03340700  |
| H        | -2.78524900 | -4.10254500 | 4.60782700  |
| O        | 0.61151000  | 0.62885600  | 2.66002600  |
| O        | 2.58894600  | -2.40514200 | -0.18042100 |
| <b>9</b> |             |             |             |
| Pd       | 0.20283200  | -0.05434400 | -0.47015900 |
| O        | 0.35777900  | 1.72228300  | -1.74044800 |
| O        | 1.81852300  | 0.08950600  | -2.09676300 |
| C        | 1.97189000  | 2.04595600  | -3.50044900 |
| C        | 1.35533300  | 1.22897000  | -2.35128100 |
| F        | 1.38097700  | 1.68132800  | -4.65995000 |
| F        | 1.78285700  | 3.35942600  | -3.33045000 |
| F        | 3.28603900  | 1.81109800  | -3.60881000 |
| C        | -3.34586000 | 1.86081500  | 0.63609200  |
| C        | -2.19028000 | 1.40888800  | -0.01443100 |
| C        | -1.38686800 | 0.46646500  | 0.63021200  |

|   |             |             |             |
|---|-------------|-------------|-------------|
| C | -1.67781100 | -0.00160200 | 1.90863200  |
| C | -2.82891300 | 0.47315200  | 2.54598800  |
| C | -3.66406600 | 1.39642900  | 1.91204000  |
| H | -3.98069200 | 2.58996600  | 0.14057800  |
| H | -1.92276800 | 1.80522200  | -0.98854300 |
| H | -1.03881400 | -0.72833400 | 2.39599700  |
| H | -3.06964300 | 0.11163500  | 3.54202900  |
| H | -4.55586200 | 1.75833100  | 2.41531500  |
| C | 3.22457600  | 1.41732900  | 2.27786700  |
| C | 2.78143500  | 0.13971200  | 2.99902300  |
| C | 1.71373400  | -0.47970500 | 2.09478000  |
| C | 2.34897100  | 1.48897100  | 1.02431000  |
| H | 4.27240600  | 1.40239800  | 1.96480500  |
| H | 3.07380500  | 2.33072100  | 2.85969800  |
| H | 3.58033100  | -0.59353800 | 3.13926900  |
| H | 2.33378300  | 0.32217000  | 3.98051400  |
| N | 1.51171600  | 0.35986400  | 1.01363400  |
| S | -0.02927100 | -2.29559300 | -0.36268800 |
| C | -1.32251200 | -3.01289200 | 0.59169100  |
| C | -0.99389300 | -3.89823100 | 1.63636500  |
| C | -2.67209000 | -2.81324200 | 0.23957200  |
| C | -2.00532700 | -4.57177300 | 2.31540700  |
| H | 0.04619100  | -4.02923600 | 1.91154900  |
| C | -3.67398000 | -3.49936400 | 0.91836100  |
| H | -2.91797700 | -2.12913000 | -0.56537700 |
| C | -3.34291600 | -4.37652500 | 1.95659500  |
| H | -1.75213600 | -5.25069900 | 3.12403800  |
| H | -4.71294200 | -3.35057000 | 0.64042900  |
| H | -4.12828400 | -4.90825200 | 2.48591500  |
| O | 2.38896400  | 2.36294700  | 0.18858400  |
| O | 1.15206100  | -1.54003700 | 2.31624800  |

TS<sub>7-10</sub>

|    |             |             |             |
|----|-------------|-------------|-------------|
| Pd | 0.77636800  | -0.89767300 | 1.09318300  |
| O  | 3.15300600  | -3.03978300 | 0.87122100  |
| O  | 2.81780100  | -0.81091300 | 1.19506300  |
| C  | 3.52061800  | -1.88886500 | 1.06859700  |
| C  | 5.03436200  | -1.57658000 | 1.20188900  |
| F  | 5.42450300  | -0.69356200 | 0.25914400  |
| F  | 5.30531300  | -1.03799600 | 2.40940900  |
| F  | 5.78130800  | -2.68141200 | 1.06629300  |
| C  | 0.88582100  | 1.45819600  | -0.59798400 |
| C  | 1.03569200  | 2.82614800  | -0.82448400 |
| C  | 0.72801800  | 3.74741900  | 0.18472800  |
| C  | 0.26270300  | 3.30754500  | 1.42504100  |
| C  | 0.09894000  | 1.93919500  | 1.66622700  |
| C  | 0.49164600  | 1.03158800  | 0.67755600  |
| H  | 1.12324200  | 0.73948100  | -1.37555900 |
| H  | 1.39104100  | 3.17273600  | -1.79059000 |
| H  | 0.83009400  | 4.81142600  | -0.00744400 |
| H  | 0.00421400  | 4.02338400  | 2.20003500  |
| H  | -0.29708400 | 1.59907600  | 2.61778800  |
| C  | 0.30886100  | -5.18948900 | 1.31781300  |
| C  | 0.66897100  | -4.94273400 | -0.15666300 |
| C  | 0.36122100  | -3.46696400 | -0.39488500 |
| C  | 0.01694700  | -3.80274700 | 1.89777800  |
| H  | 1.11378000  | -5.64674900 | 1.89777000  |
| H  | -0.58528500 | -5.80834600 | 1.44719400  |
| H  | 1.73905900  | -5.06902100 | -0.34299400 |
| H  | 0.11802600  | -5.55781800 | -0.87223100 |
| N  | 0.11830100  | -2.87623000 | 0.85311800  |
| S  | -1.50081700 | -1.04246500 | 0.85849400  |
| C  | -2.30229600 | -0.96334600 | 2.41238800  |

|   |             |             |             |
|---|-------------|-------------|-------------|
| C | -3.70113900 | -1.16472900 | 2.41297000  |
| C | -1.63289900 | -0.69622700 | 3.62601800  |
| C | -4.41419300 | -1.07044300 | 3.60229800  |
| H | -4.21127100 | -1.38596300 | 1.48062300  |
| C | -2.35627100 | -0.62121700 | 4.80907300  |
| H | -0.55426900 | -0.58683500 | 3.62811800  |
| C | -3.74501000 | -0.80023000 | 4.80064200  |
| H | -5.48985300 | -1.21624100 | 3.59875500  |
| H | -1.83823500 | -0.42846100 | 5.74322300  |
| H | -4.30373200 | -0.73570900 | 5.72939500  |
| O | -0.23967500 | -3.53392100 | 3.05259800  |
| O | 0.34758300  | -2.87362900 | -1.45213700 |

**10**

|    |             |             |             |
|----|-------------|-------------|-------------|
| Pd | -0.20435900 | 0.10493100  | -0.67074800 |
| O  | 2.56918300  | -1.95071100 | -0.51892500 |
| O  | 1.79502500  | 0.20089600  | -0.65242600 |
| C  | 2.68583600  | -0.74233700 | -0.59381100 |
| C  | 4.10358100  | -0.10244400 | -0.64328800 |
| F  | 4.28390300  | 0.56242400  | -1.80550200 |
| F  | 4.27139300  | 0.78002500  | 0.36412000  |
| F  | 5.06281700  | -1.03001000 | -0.54494100 |
| C  | -0.50513300 | 2.42823700  | -1.68164100 |
| C  | 0.46929800  | 3.43574400  | -1.57374600 |
| C  | 0.53764100  | 4.22137600  | -0.43225700 |
| C  | -0.37090100 | 4.01886100  | 0.61996000  |
| C  | -1.33163900 | 3.01979900  | 0.55035100  |
| C  | -1.39358800 | 2.21468800  | -0.60184600 |
| H  | -0.61933500 | 1.88465000  | -2.61575300 |
| H  | 1.15931400  | 3.59190000  | -2.39604200 |
| H  | 1.29162700  | 4.99762100  | -0.35149500 |
| H  | -0.31600500 | 4.64150900  | 1.50769700  |

|   |             |             |             |
|---|-------------|-------------|-------------|
| H | -2.01667100 | 2.84771900  | 1.37234200  |
| C | 0.09934800  | -3.98731800 | 0.49501600  |
| C | -0.03639800 | -4.12986500 | -1.02910000 |
| C | -0.26735100 | -2.70297300 | -1.53226200 |
| C | -0.13825600 | -2.50206100 | 0.76839100  |
| H | 1.10238600  | -4.23023700 | 0.85577400  |
| H | -0.61476800 | -4.58587300 | 1.06789900  |
| H | 0.86333600  | -4.51955700 | -1.51139200 |
| H | -0.87634300 | -4.75993200 | -1.33767100 |
| N | -0.35139300 | -1.86396200 | -0.43282100 |
| S | -2.46885500 | 0.77051900  | -0.78003400 |
| C | -3.31415500 | 0.62380300  | 0.80176300  |
| C | -4.61509800 | 1.14080400  | 0.87452500  |
| C | -2.72434100 | -0.02655100 | 1.89225900  |
| C | -5.32749000 | 1.02415500  | 2.06750500  |
| H | -5.06265400 | 1.62391200  | 0.01130800  |
| C | -3.45646500 | -0.13738900 | 3.07670300  |
| H | -1.72734100 | -0.45879500 | 1.82710600  |
| C | -4.74753000 | 0.38657400  | 3.16725100  |
| H | -6.33420700 | 1.42505600  | 2.13374700  |
| H | -3.00904000 | -0.64471700 | 3.92569200  |
| H | -5.30719600 | 0.29149100  | 4.09305000  |
| O | -0.15493500 | -1.96377600 | 1.86814300  |
| O | -0.37721100 | -2.34902400 | -2.69324100 |

**TS<sub>8-11</sub>**

|    |            |            |             |
|----|------------|------------|-------------|
| Pd | 0.16205100 | 0.36799000 | 0.61597600  |
| C  | 0.96466600 | 2.62680800 | -0.97277400 |
| C  | 1.19938800 | 3.97471000 | -1.25916200 |
| C  | 1.22605400 | 4.91872500 | -0.22827900 |
| C  | 1.02636100 | 4.51764000 | 1.09433000  |
| C  | 0.79397900 | 3.17182400 | 1.40023300  |



|   |             |             |             |
|---|-------------|-------------|-------------|
| C | 0.71425700  | 2.25242800  | 0.35110100  |
| H | 0.96357300  | 1.88938100  | -1.77049100 |
| H | 1.37178700  | 4.28044200  | -2.28738600 |
| H | 1.42493700  | 5.96224800  | -0.45461200 |
| H | 1.06897500  | 5.24627300  | 1.89935800  |
| H | 0.69023600  | 2.84813100  | 2.42949500  |
| C | -0.42112800 | -4.13399100 | 0.78379900  |
| C | 0.04056500  | -3.84878700 | -0.65436900 |
| C | -0.04306600 | -2.32582600 | -0.79168500 |
| C | -0.71498800 | -2.75293800 | 1.38700500  |
| H | 0.33932300  | -4.62587700 | 1.39689500  |
| H | -1.32690800 | -4.74455600 | 0.84339700  |
| H | 1.07143300  | -4.15736000 | -0.85082900 |
| H | -0.58724400 | -4.30937700 | -1.42251100 |
| N | -0.40708800 | -1.78239400 | 0.43323900  |
| S | -2.00717800 | 0.03968600  | 0.25438500  |
| C | -2.83873600 | 0.16935000  | 1.77665600  |
| C | -4.13851900 | -0.38777200 | 1.84566900  |
| C | -2.27952100 | 0.80677500  | 2.90931300  |
| C | -4.87420700 | -0.27705300 | 3.01701300  |
| H | -4.54933600 | -0.89489500 | 0.97851900  |
| C | -3.01603500 | 0.87879500  | 4.08292900  |
| H | -1.27020600 | 1.20065400  | 2.86396200  |
| C | -4.31178300 | 0.34915500  | 4.13622200  |
| H | -5.87581600 | -0.69151700 | 3.06957800  |
| H | -2.58361800 | 1.34979800  | 4.95962400  |
| H | -4.88421700 | 0.42046200  | 5.05630500  |
| O | -1.14437300 | -2.53210000 | 2.50139800  |
| O | 0.17885100  | -1.67240600 | -1.79579700 |
| O | 1.44860800  | 0.61270900  | 3.20201900  |
| O | 2.14203700  | 0.02059500  | 1.13131700  |

|   |            |             |            |
|---|------------|-------------|------------|
| C | 2.29079000 | 0.22695900  | 2.39422900 |
| C | 3.73862900 | -0.06185200 | 2.86304500 |
| F | 4.08058200 | -1.33801000 | 2.59105200 |
| F | 4.61043000 | 0.74642300  | 2.22791600 |
| F | 3.87830100 | 0.13186700  | 4.18118900 |

## 11

|    |             |             |             |
|----|-------------|-------------|-------------|
| Pd | 0.04605600  | -0.59514000 | -0.34618600 |
| C  | 0.91542000  | 1.40491900  | -2.33571400 |
| C  | 1.31865100  | 2.67975000  | -2.75714600 |
| C  | 1.23401900  | 3.77565400  | -1.89968100 |
| C  | 0.73558500  | 3.60842100  | -0.60737000 |
| C  | 0.33207900  | 2.34507000  | -0.15849500 |
| C  | 0.45190700  | 1.26917200  | -1.03320300 |
| H  | 0.93371100  | 0.57509700  | -3.03068900 |
| H  | 1.68730300  | 2.80090400  | -3.77177300 |
| H  | 1.54550700  | 4.75888200  | -2.23979300 |
| H  | 0.65658100  | 4.45672000  | 0.06700700  |
| H  | -0.05079800 | 2.21955400  | 0.84642000  |
| C  | -0.28606900 | -4.11084000 | -2.40094900 |
| C  | -0.26312600 | -3.36454500 | -3.74691700 |
| C  | -0.12461800 | -1.87029400 | -3.39393200 |
| C  | -0.18657300 | -2.98495900 | -1.39273200 |
| H  | 0.55386500  | -4.79877000 | -2.26530300 |
| H  | -1.20351900 | -4.67970900 | -2.22396900 |
| H  | 0.57493600  | -3.64671200 | -4.38973100 |
| H  | -1.17865900 | -3.49508300 | -4.33053400 |
| N  | -0.07621200 | -1.77342600 | -2.00678200 |
| S  | -2.23347800 | -0.24878200 | -0.61025700 |
| C  | -2.71212700 | 0.32072500  | 0.99055900  |
| C  | -2.86546200 | -0.58556900 | 2.05850600  |
| C  | -3.01411300 | 1.68282000  | 1.18623000  |

|   |             |             |             |
|---|-------------|-------------|-------------|
| C | -3.31372600 | -0.13354700 | 3.29609600  |
| H | -2.62740600 | -1.63277100 | 1.90299000  |
| C | -3.47568100 | 2.12371000  | 2.42422300  |
| H | -2.89062100 | 2.37616200  | 0.36087000  |
| C | -3.62123300 | 1.21846200  | 3.47959500  |
| H | -3.42709600 | -0.83393100 | 4.11805600  |
| H | -3.71772600 | 3.17245900  | 2.56880400  |
| H | -3.97494700 | 1.56639500  | 4.44581100  |
| O | -0.20086700 | -3.04342600 | -0.15380800 |
| O | -0.06050900 | -0.96213800 | -4.19680100 |
| O | 0.41853200  | 0.03750100  | 1.60104300  |
| O | 2.17686500  | -0.83772700 | 0.58030500  |
| C | 1.64438300  | -0.34109400 | 1.59065900  |
| C | 2.44047700  | -0.12111100 | 2.88846800  |
| F | 3.63375500  | -0.71747300 | 2.83198500  |
| F | 2.62787100  | 1.19877300  | 3.07868900  |
| F | 1.76305400  | -0.60767500 | 3.94094200  |

**TS<sub>8-12</sub>**

|    |             |             |             |
|----|-------------|-------------|-------------|
| Pd | 0.22250900  | -0.89352600 | -0.56448300 |
| O  | 2.26683400  | -1.10499500 | 1.50237500  |
| O  | 2.29000000  | -0.79966500 | -0.74256700 |
| C  | 2.82545200  | -0.93349800 | 0.41688900  |
| C  | 4.36878400  | -0.81281800 | 0.37141200  |
| F  | 4.93163500  | -1.18103600 | 1.53274500  |
| F  | 4.72222100  | 0.47095300  | 0.13159400  |
| F  | 4.89935300  | -1.57365500 | -0.60486400 |
| C  | 0.05770500  | 1.56618300  | 1.20833000  |
| C  | 0.45195200  | 2.89974200  | 1.28456500  |
| C  | 0.29837900  | 3.74094000  | 0.17693900  |
| C  | -0.25121700 | 3.25766700  | -1.01462400 |
| C  | -0.64705100 | 1.92546200  | -1.09857800 |

|           |             |             |             |
|-----------|-------------|-------------|-------------|
| C         | -0.47884100 | 1.06302600  | 0.00634700  |
| H         | 0.18939100  | 0.91336300  | 2.06315200  |
| H         | 0.88512000  | 3.28362300  | 2.20329500  |
| H         | 0.60390800  | 4.78114800  | 0.24553700  |
| H         | -0.37341300 | 3.91776000  | -1.86803500 |
| H         | -1.08993300 | 1.54851600  | -2.01649200 |
| C         | -1.69936900 | -4.72029500 | -1.42926100 |
| C         | -3.21838600 | -4.65925400 | -1.18659600 |
| C         | -3.47245000 | -3.23015600 | -0.68649700 |
| C         | -1.20953900 | -3.32673100 | -1.06195300 |
| H         | -1.18100700 | -5.45200300 | -0.80264100 |
| H         | -1.42335100 | -4.93263500 | -2.46610300 |
| H         | -3.56882700 | -5.36837300 | -0.43145000 |
| H         | -3.81173500 | -4.83074200 | -2.08913500 |
| N         | -2.24272500 | -2.55993500 | -0.64789900 |
| S         | -1.89169100 | -0.56471200 | -0.10820500 |
| C         | -2.16097800 | -0.89540300 | 1.64243300  |
| C         | -3.46371600 | -0.71132700 | 2.11843300  |
| C         | -1.13208000 | -1.34281100 | 2.48253300  |
| C         | -3.73735300 | -0.96835300 | 3.46227200  |
| H         | -4.25261000 | -0.39849700 | 1.44310000  |
| C         | -1.42577900 | -1.59725100 | 3.82274200  |
| H         | -0.11957200 | -1.47561100 | 2.10661600  |
| C         | -2.72122800 | -1.40885300 | 4.31247500  |
| H         | -4.74587500 | -0.83028300 | 3.83960600  |
| H         | -0.63465700 | -1.93890600 | 4.48321800  |
| H         | -2.93842700 | -1.60764800 | 5.35783900  |
| O         | -0.01561100 | -2.96797200 | -1.14318500 |
| O         | -4.53534400 | -2.74049400 | -0.37319900 |
| <b>12</b> |             |             |             |
| Pd        | 0.13475900  | 0.25974300  | -0.89251000 |

|   |             |             |             |
|---|-------------|-------------|-------------|
| O | 2.43857600  | 0.47479600  | 0.85195900  |
| O | 2.11258100  | 0.07340200  | -1.35314900 |
| C | 2.82529300  | 0.23833100  | -0.28875700 |
| C | 4.34068300  | 0.13198500  | -0.59185800 |
| F | 5.07343200  | 0.24031900  | 0.52475900  |
| F | 4.71642600  | 1.12247500  | -1.43175600 |
| F | 4.63951800  | -1.04236000 | -1.17664200 |
| C | -0.51147100 | 2.83636300  | 1.28230500  |
| C | 0.51354800  | 3.76617800  | 1.34395300  |
| C | 1.23729100  | 4.12873300  | 0.19257600  |
| C | 0.90529600  | 3.58573700  | -1.03635600 |
| C | -0.15026100 | 2.65493800  | -1.13655300 |
| C | -0.84868600 | 2.26554500  | 0.03934000  |
| H | -1.04283200 | 2.54066900  | 2.17863200  |
| H | 0.77048400  | 4.21018400  | 2.30084200  |
| H | 2.04932000  | 4.84439700  | 0.27064000  |
| H | 1.43728000  | 3.87860400  | -1.93552600 |
| H | -0.51765000 | 2.37570800  | -2.12201100 |
| C | -1.26724500 | -3.80782700 | -1.49177600 |
| C | -2.76692500 | -4.08466600 | -1.33075000 |
| C | -3.34960700 | -2.70938000 | -0.94098000 |
| C | -1.18360700 | -2.31200900 | -1.19379500 |
| H | -0.63167700 | -4.35627000 | -0.78987900 |
| H | -0.87831700 | -4.00232700 | -2.49586300 |
| H | -2.99846700 | -4.81331100 | -0.54874000 |
| H | -3.24833900 | -4.43408200 | -2.24880200 |
| N | -2.33624800 | -1.74439000 | -0.91523100 |
| S | -1.98559700 | 0.88571500  | -0.23961600 |
| C | -2.30725300 | 0.25215600  | 1.41451600  |
| C | -3.64992800 | 0.11283600  | 1.77523400  |
| C | -1.27453600 | -0.15047900 | 2.27084400  |

|   |             |             |             |
|---|-------------|-------------|-------------|
| C | -3.96335400 | -0.41560700 | 3.02817200  |
| H | -4.43627900 | 0.38121700  | 1.07816100  |
| C | -1.60603600 | -0.67260600 | 3.52086500  |
| H | -0.23431000 | -0.06606500 | 1.96896900  |
| C | -2.94510000 | -0.80295000 | 3.90026600  |
| H | -5.00393500 | -0.53355300 | 3.31318500  |
| H | -0.81348700 | -0.98643800 | 4.19325700  |
| H | -3.19359800 | -1.21716000 | 4.87280500  |
| O | -0.03508900 | -1.74008200 | -1.22803300 |
| O | -4.51733500 | -2.48863500 | -0.68498400 |

**TS<sub>12-13</sub>**

|    |             |             |             |
|----|-------------|-------------|-------------|
| Pd | 0.26448000  | 0.21861600  | 0.28526800  |
| O  | 1.08434600  | 2.25459400  | 1.98662400  |
| O  | 2.18786600  | 0.74143600  | 0.73528600  |
| C  | 2.11318600  | 1.73582400  | 1.55206500  |
| C  | 3.49927100  | 2.29451800  | 1.94914700  |
| F  | 4.30741200  | 1.31971000  | 2.40175900  |
| F  | 4.08973700  | 2.86195100  | 0.87477700  |
| F  | 3.39407500  | 3.22830400  | 2.90426100  |
| C  | -0.67661600 | 2.20951300  | -1.16159500 |
| C  | -0.28107200 | 3.55573200  | -1.18485000 |
| C  | -0.91387100 | 4.47920100  | -0.36378400 |
| C  | -1.95480500 | 4.06951800  | 0.48311700  |
| C  | -2.34775800 | 2.73876700  | 0.53988400  |
| C  | -1.70323200 | 1.79646700  | -0.27830600 |
| H  | -0.26082500 | 1.51819300  | -1.89173100 |
| H  | 0.51010100  | 3.86569500  | -1.85986200 |
| H  | -0.61128400 | 5.52131700  | -0.38204400 |
| H  | -2.45738800 | 4.79900800  | 1.11093700  |
| H  | -3.13963700 | 2.42910000  | 1.21099500  |
| C  | 0.50767600  | -4.11663500 | 0.56842900  |

|   |             |             |             |
|---|-------------|-------------|-------------|
| C | -0.76103000 | -4.93664700 | 0.30119300  |
| C | -1.83124700 | -3.86405000 | 0.00688000  |
| C | 0.00786700  | -2.68560300 | 0.37689200  |
| H | 1.32738800  | -4.31451200 | -0.12872700 |
| H | 0.91098500  | -4.23052800 | 1.57917400  |
| H | -0.67496700 | -5.60709100 | -0.55885000 |
| H | -1.07859200 | -5.54470100 | 1.15295500  |
| N | -1.26354500 | -2.58746200 | 0.06214000  |
| S | -1.96193400 | 0.00482800  | -0.26471700 |
| C | -2.90970800 | -0.28854100 | 1.23883000  |
| C | -4.05492400 | -1.07878900 | 1.10803000  |
| C | -2.48702000 | 0.18239700  | 2.48806400  |
| C | -4.80681600 | -1.37311900 | 2.24604100  |
| H | -4.32335400 | -1.50120700 | 0.14615800  |
| C | -3.25278000 | -0.11793300 | 3.61471600  |
| H | -1.57651100 | 0.76641700  | 2.58311200  |
| C | -4.41210000 | -0.88901300 | 3.49429500  |
| H | -5.69239200 | -1.99377200 | 2.15369100  |
| H | -2.93467600 | 0.24448100  | 4.58748800  |
| H | -4.99954400 | -1.12351400 | 4.37699800  |
| O | 0.83291700  | -1.71699300 | 0.53708000  |
| O | -3.00272600 | -4.08595600 | -0.23440700 |

**13**

|    |            |             |             |
|----|------------|-------------|-------------|
| Pd | 0.87488200 | -0.44440700 | -0.16643000 |
| O  | 1.28038600 | 1.19750800  | 1.06810600  |
| O  | 2.86373600 | -0.29087800 | 0.69426600  |
| C  | 2.47021400 | 0.77501000  | 1.23727700  |
| C  | 3.43809500 | 1.62636900  | 2.07325100  |
| F  | 4.46592900 | 0.89491100  | 2.51279100  |
| F  | 3.91681300 | 2.62584300  | 1.30748900  |
| F  | 2.80535900 | 2.16459200  | 3.12554200  |

|   |             |             |             |
|---|-------------|-------------|-------------|
| C | -0.37362000 | 2.24925600  | -1.83655500 |
| C | -0.50853600 | 3.54418300  | -2.34148800 |
| C | -1.73394600 | 4.20569100  | -2.26375100 |
| C | -2.83317900 | 3.56671100  | -1.68462800 |
| C | -2.71266900 | 2.27195200  | -1.18246700 |
| C | -1.47544300 | 1.61843500  | -1.25088200 |
| H | 0.58319100  | 1.73928900  | -1.89084400 |
| H | 0.35119800  | 4.03438800  | -2.78800800 |
| H | -1.83383600 | 5.21455600  | -2.65231300 |
| H | -3.79113700 | 4.07460800  | -1.62519900 |
| H | -3.56998500 | 1.77836400  | -0.73720900 |
| C | 0.42167300  | -4.32401100 | -2.01226600 |
| C | -0.82327000 | -5.14194700 | -1.64530500 |
| C | -1.63767400 | -4.17710600 | -0.75629600 |
| C | 0.18527700  | -3.03672700 | -1.22997100 |
| H | 0.50655400  | -4.09889700 | -3.08015100 |
| H | 1.36839600  | -4.77674300 | -1.70257100 |
| H | -1.42574900 | -5.44293600 | -2.50647800 |
| H | -0.59422500 | -6.04890100 | -1.07776500 |
| N | -0.92294500 | -2.99680400 | -0.53198500 |
| S | -1.35825300 | -0.11875700 | -0.75234600 |
| C | -2.22055400 | -0.12815300 | 0.83813500  |
| C | -3.05799400 | -1.21556100 | 1.11061400  |
| C | -2.03543700 | 0.90238300  | 1.76902400  |
| C | -3.73076900 | -1.25232100 | 2.33366500  |
| H | -3.15502600 | -2.03830300 | 0.41043900  |
| C | -2.71895300 | 0.84794800  | 2.98262000  |
| H | -1.36698300 | 1.72811800  | 1.55305500  |
| C | -3.56762900 | -0.22598700 | 3.26508300  |
| H | -4.37923900 | -2.09478700 | 2.55317900  |
| H | -2.58037400 | 1.64283700  | 3.70932000  |



|   |             |             |             |
|---|-------------|-------------|-------------|
| H | -4.09537000 | -0.26409800 | 4.21356500  |
| O | 1.04866300  | -2.08444600 | -1.30423100 |
| O | -2.75392900 | -4.39697000 | -0.32235200 |

**TS<sub>12-14</sub>**

|    |             |             |             |
|----|-------------|-------------|-------------|
| Pd | 0.05997700  | 0.36139400  | -0.93470100 |
| O  | 2.48838100  | 0.62768500  | 0.75586100  |
| O  | 1.99426000  | 0.21971000  | -1.42156100 |
| C  | 2.78262300  | 0.37293900  | -0.40214000 |
| C  | 4.26558400  | 0.20823500  | -0.82417500 |
| F  | 5.08331700  | 0.31500900  | 0.23106800  |
| F  | 4.60886800  | 1.16329400  | -1.71499000 |
| F  | 4.47578500  | -0.99071900 | -1.39872600 |
| C  | -0.43387200 | 2.69075700  | 1.34448900  |
| C  | 0.62245900  | 3.57964700  | 1.44629300  |
| C  | 1.28192800  | 4.05630600  | 0.29687800  |
| C  | 0.86900000  | 3.66309300  | -0.96470600 |
| C  | -0.21715500 | 2.77435300  | -1.11138200 |
| C  | -0.84671400 | 2.27727300  | 0.06311800  |
| H  | -0.92134000 | 2.29694500  | 2.22857300  |
| H  | 0.95826500  | 3.89552700  | 2.42881600  |
| H  | 2.11540900  | 4.74297600  | 0.40440700  |
| H  | 1.35851300  | 4.04573900  | -1.85406200 |
| H  | -0.64914100 | 2.60926800  | -2.09465400 |
| C  | -0.27702700 | -3.60174600 | -2.32789700 |
| C  | -0.64490500 | -3.33661300 | -3.79818300 |
| C  | -0.78186200 | -1.79770700 | -3.88538900 |
| C  | -0.21235700 | -2.19502600 | -1.75332300 |
| H  | -1.01987900 | -4.19387200 | -1.78366900 |
| H  | 0.69018600  | -4.09526000 | -2.19181800 |
| H  | -1.58492100 | -3.80209400 | -4.10787300 |

|   |             |             |             |
|---|-------------|-------------|-------------|
| H | 0.12426700  | -3.66605100 | -4.50282100 |
| N | -0.49087400 | -1.24503300 | -2.63895100 |
| S | -2.09625000 | 1.02326500  | -0.27488100 |
| C | -2.50933200 | 0.33478300  | 1.33537900  |
| C | -3.67285300 | 0.80687900  | 1.95605000  |
| C | -1.72892300 | -0.67213800 | 1.91576200  |
| C | -4.04615100 | 0.27722300  | 3.19120100  |
| H | -4.27636800 | 1.57420200  | 1.48077100  |
| C | -2.12063900 | -1.19310900 | 3.15024600  |
| H | -0.85017100 | -1.05175200 | 1.40480100  |
| C | -3.26975500 | -0.71953900 | 3.78718100  |
| H | -4.94376700 | 0.63992000  | 3.68228500  |
| H | -1.52394900 | -1.97517400 | 3.60916600  |
| H | -3.56566500 | -1.13298100 | 4.74667000  |
| O | 0.07973900  | -1.90963500 | -0.55599800 |
| O | -1.10010600 | -1.18185200 | -4.88302000 |

**TS<sub>13-14</sub>**

|    |             |             |             |
|----|-------------|-------------|-------------|
| Pd | 0.84838000  | -0.36264800 | -0.27378800 |
| O  | 1.60735600  | 1.18284800  | 1.08010700  |
| O  | 2.86422200  | -0.45195500 | 0.30129500  |
| C  | 2.72237200  | 0.59259600  | 1.00480800  |
| C  | 3.94066600  | 1.18323700  | 1.73073700  |
| F  | 4.84732900  | 0.23785500  | 1.99911000  |
| F  | 4.51260900  | 2.11563700  | 0.94403000  |
| F  | 3.57029400  | 1.76849600  | 2.87801800  |
| C  | -0.83598100 | 2.75596600  | -0.55604300 |
| C  | -0.94171200 | 4.05169400  | -1.06013300 |
| C  | -1.69261500 | 4.30425700  | -2.21200600 |
| C  | -2.34449500 | 3.25943500  | -2.86824500 |
| C  | -2.25044800 | 1.95726500  | -2.37407400 |
| C  | -1.50011400 | 1.71412700  | -1.21825200 |

|           |             |             |             |
|-----------|-------------|-------------|-------------|
| H         | -0.23988600 | 2.55643700  | 0.32741900  |
| H         | -0.42840800 | 4.86391200  | -0.55461700 |
| H         | -1.76491000 | 5.31601400  | -2.59958500 |
| H         | -2.92495300 | 3.45292400  | -3.76495700 |
| H         | -2.75042300 | 1.13759500  | -2.88031000 |
| C         | 0.57403000  | -3.97273200 | -2.50423000 |
| C         | 0.10265500  | -4.91920100 | -1.38436300 |
| C         | -0.14340700 | -3.98433200 | -0.17904200 |
| C         | 0.61887600  | -2.62581700 | -1.79687100 |
| H         | -0.11362900 | -3.92016200 | -3.35436000 |
| H         | 1.56347200  | -4.21099900 | -2.90576200 |
| H         | -0.81766400 | -5.46092400 | -1.61959000 |
| H         | 0.85314300  | -5.66611500 | -1.10793500 |
| N         | 0.23270100  | -2.69325900 | -0.52064800 |
| S         | -1.37827000 | 0.00090200  | -0.68194700 |
| C         | -2.16149100 | -0.02898400 | 0.95310300  |
| C         | -2.00215300 | -1.19798700 | 1.71111800  |
| C         | -2.96879200 | 1.02029200  | 1.40322500  |
| C         | -2.65266700 | -1.29474800 | 2.94116600  |
| H         | -1.38710100 | -2.02282100 | 1.36303400  |
| C         | -3.61026800 | 0.90224600  | 2.63719500  |
| H         | -3.10191000 | 1.91510200  | 0.80696900  |
| C         | -3.45198900 | -0.24967100 | 3.40874600  |
| H         | -2.52615700 | -2.19755900 | 3.53046700  |
| H         | -4.23556800 | 1.71666500  | 2.99074700  |
| H         | -3.95185200 | -0.33333400 | 4.36903800  |
| O         | 0.97042600  | -1.53207200 | -2.30508300 |
| O         | -0.61112600 | -4.32518800 | 0.89403500  |
| <b>14</b> |             |             |             |
| Pd        | 0.48202800  | -0.53935700 | -0.06665000 |
| O         | 1.15411500  | 1.04149400  | 1.19389300  |

|   |             |             |             |
|---|-------------|-------------|-------------|
| O | 2.52377000  | -0.58682300 | 0.60602000  |
| C | 2.30287500  | 0.49730300  | 1.21084000  |
| C | 3.44925900  | 1.21569800  | 1.93993900  |
| F | 4.42187400  | 0.36133000  | 2.27233000  |
| F | 3.96366800  | 2.15928500  | 1.12792100  |
| F | 2.99959800  | 1.81516200  | 3.05200300  |
| C | -0.96507000 | 2.52436500  | -0.94938600 |
| C | -1.08287200 | 3.74095800  | -1.62240500 |
| C | -2.07612000 | 3.92216400  | -2.58811400 |
| C | -2.96076400 | 2.88487100  | -2.88719600 |
| C | -2.85473700 | 1.66237100  | -2.22247900 |
| C | -1.85940000 | 1.49004000  | -1.25359700 |
| H | -0.19111900 | 2.38127900  | -0.20321700 |
| H | -0.39061400 | 4.54546600  | -1.39377100 |
| H | -2.15675600 | 4.87058200  | -3.11070800 |
| H | -3.73031900 | 3.02144600  | -3.64069700 |
| H | -3.53384100 | 0.84811800  | -2.45498600 |
| C | 0.80189600  | -3.70782100 | -2.93476000 |
| C | -0.18533300 | -4.35010800 | -1.94872100 |
| C | -0.43311200 | -3.27133800 | -0.88947900 |
| C | 1.02870700  | -2.29293800 | -2.38944500 |
| H | 0.42281800  | -3.63936900 | -3.95828000 |
| H | 1.76667100  | -4.22151100 | -2.98264900 |
| H | -1.14254100 | -4.62522100 | -2.40179300 |
| H | 0.20446600  | -5.24511300 | -1.45509200 |
| N | 0.31726600  | -2.16106700 | -1.20368700 |
| S | -1.76501700 | -0.13421700 | -0.47888300 |
| C | -2.47019400 | 0.09822300  | 1.17666100  |
| C | -2.57138500 | -1.06121800 | 1.95713800  |
| C | -2.92984500 | 1.33113000  | 1.64233700  |
| C | -3.13886400 | -0.96766900 | 3.22701800  |

|   |             |             |             |
|---|-------------|-------------|-------------|
| H | -2.20222800 | -2.00800900 | 1.57217500  |
| C | -3.49950700 | 1.40208200  | 2.91577900  |
| H | -2.84967900 | 2.22237700  | 1.03138600  |
| C | -3.60341600 | 0.25905200  | 3.70862000  |
| H | -3.21739100 | -1.86050200 | 3.83998900  |
| H | -3.85898600 | 2.35815000  | 3.28448500  |
| H | -4.04465300 | 0.32315200  | 4.69869700  |
| O | 1.70817600  | -1.42143400 | -2.89985600 |
| O | -1.18361900 | -3.37552100 | 0.07273400  |

**TS<sub>14-15</sub>**

|    |             |             |             |
|----|-------------|-------------|-------------|
| Pd | 0.76130500  | -0.56079000 | -0.01705700 |
| O  | 1.87876300  | 0.88579000  | 0.94940400  |
| O  | 2.61989400  | -1.18990700 | 1.04360200  |
| C  | 2.72409900  | 0.02128700  | 1.35931400  |
| C  | 3.84822700  | 0.47872500  | 2.30170200  |
| F  | 4.11607400  | 1.77946100  | 2.13091100  |
| F  | 3.46281600  | 0.28522900  | 3.57666700  |
| F  | 4.96472800  | -0.22671100 | 2.08280100  |
| C  | -0.99217400 | 2.68641400  | 1.12255900  |
| C  | -1.34497900 | 3.97627800  | 0.72927700  |
| C  | -2.64231400 | 4.25229200  | 0.28655600  |
| C  | -3.59564500 | 3.23479900  | 0.24497300  |
| C  | -3.25879500 | 1.94223500  | 0.65459300  |
| C  | -1.95679600 | 1.66802600  | 1.09218100  |
| H  | 0.02220700  | 2.46590200  | 1.43632400  |
| H  | -0.59804000 | 4.76419800  | 0.75257900  |
| H  | -2.90596700 | 5.25737400  | -0.02892100 |
| H  | -4.60435200 | 3.44308000  | -0.09876000 |
| H  | -4.00012000 | 1.14944800  | 0.63705200  |
| C  | 0.25959600  | -4.16802700 | -2.23134000 |
| C  | -0.44692900 | -4.57027100 | -0.93009100 |

|           |             |             |             |
|-----------|-------------|-------------|-------------|
| C         | -0.43989100 | -3.30189300 | -0.07416700 |
| C         | 0.50525400  | -2.66545600 | -2.09157800 |
| H         | -0.32309400 | -4.35730400 | -3.13703400 |
| H         | 1.22839200  | -4.65903600 | -2.36480600 |
| H         | -1.48467100 | -4.88451800 | -1.08177100 |
| H         | 0.05288800  | -5.36986100 | -0.37757700 |
| N         | -0.00114400 | -2.22559200 | -0.85535700 |
| S         | -1.55677600 | -0.03891900 | 1.47981100  |
| C         | -0.94594000 | 0.00666200  | 3.17581500  |
| C         | -0.21782200 | -1.10633000 | 3.61818400  |
| C         | -1.22975900 | 1.06106000  | 4.04986500  |
| C         | 0.23685300  | -1.14673400 | 4.93604000  |
| H         | -0.02601000 | -1.93186100 | 2.94058100  |
| C         | -0.76278300 | 1.00682600  | 5.36447700  |
| H         | -1.80559300 | 1.91582600  | 3.71404200  |
| C         | -0.02740500 | -0.09139600 | 5.81162700  |
| H         | 0.80500400  | -2.00829300 | 5.27429500  |
| H         | -0.98080500 | 1.82966500  | 6.03928300  |
| H         | 0.33551100  | -0.12554400 | 6.83438800  |
| O         | 1.03310300  | -1.93952100 | -2.91114000 |
| O         | -0.76758000 | -3.23091800 | 1.09555400  |
| C         | -1.82404600 | 1.58862000  | -3.16438800 |
| F         | -1.72569100 | 1.13918000  | -4.42522400 |
| F         | -3.12329900 | 1.74868500  | -2.86655300 |
| F         | -1.20926200 | 2.76625500  | -3.07239600 |
| C         | -1.18093400 | 0.56594900  | -2.20422000 |
| O         | -0.14289900 | 0.82322800  | -1.61582000 |
| O         | -1.87656100 | -0.54333800 | -2.12358700 |
| H         | -1.37083800 | -1.19645400 | -1.56488400 |
| <b>15</b> |             |             |             |
| Pd        | 0.27195400  | 0.18998200  | -0.05428700 |

|   |             |             |             |
|---|-------------|-------------|-------------|
| O | 1.11299500  | 2.12045600  | -0.32179200 |
| O | 2.32289700  | 0.31523500  | -0.00278700 |
| C | 2.24424900  | 1.57379900  | -0.19285100 |
| C | 3.53262800  | 2.40933700  | -0.21700300 |
| F | 3.92971700  | 2.64019400  | 1.04583100  |
| F | 3.32294200  | 3.57923600  | -0.82522400 |
| F | 4.50267400  | 1.74643700  | -0.85852100 |
| C | 0.91750600  | -4.00508000 | -0.20038100 |
| C | 0.90448500  | -3.77789800 | 1.31858100  |
| C | 0.39815600  | -2.34663300 | 1.50341700  |
| C | 0.42463000  | -2.68917300 | -0.80431600 |
| H | 1.91156900  | -4.21692500 | -0.60405100 |
| H | 0.26018800  | -4.81555700 | -0.52929500 |
| H | 1.89256700  | -3.85378900 | 1.78130700  |
| H | 0.24507700  | -4.46213600 | 1.86075900  |
| N | 0.05177100  | -1.81330600 | 0.24064400  |
| O | 0.33521700  | -2.41817400 | -1.98261400 |
| O | 0.28203300  | -1.74604700 | 2.54996500  |
| C | -4.12798600 | 0.29286100  | -0.15802400 |
| F | -4.61376500 | 0.38613100  | 1.08929500  |
| F | -4.88416300 | -0.55985700 | -0.85694600 |
| F | -4.16658900 | 1.49218000  | -0.73434000 |
| C | -2.67530500 | -0.22413700 | -0.08030200 |
| O | -1.74787900 | 0.58808300  | -0.19513500 |
| O | -2.57228200 | -1.49063200 | 0.13579900  |
| H | -1.57155600 | -1.72691600 | 0.20119600  |

**TS<sub>14-15'</sub>**

|    |            |             |            |
|----|------------|-------------|------------|
| Pd | 0.72976700 | -0.56624000 | 0.02022300 |
| O  | 1.83468600 | 0.91559000  | 0.93893400 |
| O  | 2.71430900 | -1.11123600 | 0.99334800 |
| C  | 2.75439200 | 0.10268400  | 1.29720000 |

|   |             |             |             |
|---|-------------|-------------|-------------|
| C | 3.89614600  | 0.64465000  | 2.17214000  |
| F | 4.10236600  | 1.94885900  | 1.94136800  |
| F | 3.57227900  | 0.48912900  | 3.47011800  |
| F | 5.03401400  | -0.01997200 | 1.93647800  |
| C | -1.00685300 | 2.66509200  | 1.09774300  |
| C | -1.40286900 | 3.96197800  | 0.77182300  |
| C | -2.73894800 | 4.24006200  | 0.46882000  |
| C | -3.68769600 | 3.21718900  | 0.49707700  |
| C | -3.30479000 | 1.91702900  | 0.83510100  |
| C | -1.96480900 | 1.64136500  | 1.13586100  |
| H | 0.03323700  | 2.44560300  | 1.31155900  |
| H | -0.66128700 | 4.75496300  | 0.74437900  |
| H | -3.03823300 | 5.25184600  | 0.21101700  |
| H | -4.72761800 | 3.42828500  | 0.26558600  |
| H | -4.03961300 | 1.11884500  | 0.87149300  |
| C | 0.14715500  | -4.17805200 | -2.19227900 |
| C | -0.55091600 | -4.56577000 | -0.88288200 |
| C | -0.50196400 | -3.29831700 | -0.02611400 |
| C | 0.45873300  | -2.68793300 | -2.03892800 |
| H | -0.46335700 | -4.32829200 | -3.08711500 |
| H | 1.08994200  | -4.70920900 | -2.35397900 |
| H | -1.59714100 | -4.85812300 | -1.01812100 |
| H | -0.05952000 | -5.37603900 | -0.33795400 |
| N | -0.01376400 | -2.24382000 | -0.79652900 |
| S | -1.52509000 | -0.06684400 | 1.48003500  |
| C | -0.94772700 | -0.03748100 | 3.19116700  |
| C | -0.25780700 | -1.16928400 | 3.64671400  |
| C | -1.21829100 | 1.02487500  | 4.05917500  |
| C | 0.16956700  | -1.22159900 | 4.97292000  |
| H | -0.07500300 | -1.99841500 | 2.97126700  |
| C | -0.77917600 | 0.95786000  | 5.38313300  |



|            |             |             |             |
|------------|-------------|-------------|-------------|
| H          | -1.76229700 | 1.89605500  | 3.71319700  |
| C          | -0.08356000 | -0.15979600 | 5.84433300  |
| H          | 0.70774100  | -2.09817900 | 5.32160200  |
| H          | -0.98689500 | 1.78720100  | 6.05327800  |
| H          | 0.25804100  | -0.20396600 | 6.87407600  |
| O          | 1.01202200  | -1.98193700 | -2.86090000 |
| O          | -0.84023200 | -3.22164000 | 1.14237800  |
| C          | -1.50065900 | 1.54789900  | -3.43347600 |
| C          | -1.05366400 | 0.61055900  | -2.34815300 |
| O          | -0.06579700 | 0.82217000  | -1.64853700 |
| O          | -1.82414800 | -0.46562000 | -2.22445400 |
| H          | -1.40053200 | -1.08077800 | -1.58126900 |
| H          | -2.58246900 | 1.69284200  | -3.38692900 |
| H          | -1.26386400 | 1.09805100  | -4.40326500 |
| H          | -0.97899900 | 2.49894500  | -3.33774200 |
| <b>15'</b> |             |             |             |
| Pd         | 0.69565100  | -0.33161100 | -1.11988800 |
| O          | 1.86275100  | 1.11194500  | -0.06949400 |
| O          | 2.25113900  | -1.05031700 | 0.02795600  |
| C          | 2.53716700  | 0.14133700  | 0.37551900  |
| C          | 3.67590800  | 0.37512000  | 1.37910700  |
| F          | 4.18582200  | 1.60250600  | 1.23619800  |
| F          | 3.19380700  | 0.25029500  | 2.62826300  |
| F          | 4.64916300  | -0.52662500 | 1.20341200  |
| C          | 0.42055800  | -4.25441300 | -2.76315800 |
| C          | -0.46415600 | -4.41274200 | -1.51798600 |
| C          | -0.64431900 | -2.99227400 | -0.97638300 |
| C          | 0.70230700  | -2.75283900 | -2.86049000 |
| H          | -0.05805100 | -4.58821700 | -3.68871000 |
| H          | 1.37723200  | -4.77953200 | -2.69137200 |
| H          | -1.44805500 | -4.84266000 | -1.72779100 |

|   |             |             |             |
|---|-------------|-------------|-------------|
| H | -0.00968700 | -5.02379900 | -0.73292300 |
| N | -0.01212200 | -2.08706600 | -1.84821900 |
| O | 1.40567500  | -2.20054200 | -3.68161400 |
| O | -1.24731300 | -2.67203800 | 0.02719600  |
| C | -2.49408700 | 1.63581900  | -3.40050700 |
| C | -1.61773300 | 0.57542800  | -2.80641000 |
| O | -0.65438000 | 0.88386000  | -2.07536500 |
| O | -1.93495100 | -0.65276500 | -3.10830100 |
| H | -1.27487400 | -1.27611100 | -2.66789600 |
| H | -3.53072700 | 1.45678600  | -3.10127900 |
| H | -2.44958800 | 1.56813600  | -4.49154300 |
| H | -2.16888700 | 2.62110600  | -3.07111100 |

**TS<sub>15-16</sub>**

|    |             |             |             |
|----|-------------|-------------|-------------|
| Pd | 0.18709900  | 0.15395400  | -0.03413700 |
| O  | 1.06934200  | 2.05642900  | -0.27538000 |
| O  | 2.25103400  | 0.22893800  | 0.01574700  |
| C  | 2.19313200  | 1.49063200  | -0.15810300 |
| C  | 3.49272300  | 2.30847100  | -0.17822500 |
| F  | 3.89769900  | 2.51858100  | 1.08571600  |
| F  | 3.29870600  | 3.48712200  | -0.77299000 |
| F  | 4.44989500  | 1.63675100  | -0.83037200 |
| C  | 1.14829700  | -3.88587500 | -0.23028800 |
| C  | 1.10670600  | -3.67581800 | 1.28942600  |
| C  | 0.29043900  | -2.40620300 | 1.50761300  |
| C  | 0.36996000  | -2.71888300 | -0.82857700 |
| H  | 2.15929300  | -3.87447400 | -0.64754000 |
| H  | 0.67985800  | -4.81955800 | -0.55571700 |
| H  | 2.09401200  | -3.52769700 | 1.73679500  |
| H  | 0.63004800  | -4.49608700 | 1.83402400  |
| N  | -0.14237000 | -1.89259900 | 0.23360700  |
| O  | 0.17784300  | -2.48890200 | -1.99654600 |

|   |             |             |             |
|---|-------------|-------------|-------------|
| O | 0.01743900  | -1.88294000 | 2.55901800  |
| C | -4.13933200 | 0.33301400  | -0.15116500 |
| F | -4.42722400 | 0.92449600  | 1.02067900  |
| F | -5.04160000 | -0.62352000 | -0.38330600 |
| F | -4.21571300 | 1.24751500  | -1.12532100 |
| C | -2.71110700 | -0.25753100 | -0.07392700 |
| O | -1.78419100 | 0.59672200  | -0.16274300 |
| O | -2.59982600 | -1.49688400 | 0.09614500  |
| H | -1.35999300 | -1.77328200 | 0.17594200  |

**16**

|    |             |             |             |
|----|-------------|-------------|-------------|
| Pd | 0.15499200  | 0.07419800  | -0.00533900 |
| O  | 1.04630700  | 1.98184600  | -0.22428400 |
| O  | 2.22635200  | 0.15275600  | 0.07108800  |
| C  | 2.16734900  | 1.41774600  | -0.09391200 |
| C  | 3.46707900  | 2.23563100  | -0.08552800 |
| F  | 3.85881200  | 2.41944300  | 1.18664200  |
| F  | 3.28182300  | 3.42448100  | -0.65987500 |
| F  | 4.42982100  | 1.57276900  | -0.74000400 |
| C  | 1.71720900  | -3.34506700 | -0.33430800 |
| C  | 1.72399100  | -3.12244900 | 1.18630900  |
| C  | 0.41910300  | -2.40931000 | 1.51006500  |
| C  | 0.43242800  | -2.70899300 | -0.84654600 |
| H  | 2.56097900  | -2.86760600 | -0.84139500 |
| H  | 1.72014400  | -4.39920400 | -0.62482100 |
| H  | 2.54748800  | -2.48055600 | 1.51500200  |
| H  | 1.77576500  | -4.04392300 | 1.77152200  |
| N  | -0.19858700 | -1.99962700 | 0.25702700  |
| O  | -0.03183700 | -2.75357100 | -1.95365900 |
| O  | -0.06653600 | -2.19147300 | 2.58698900  |
| C  | -4.12370100 | 0.49198700  | -0.22404500 |
| F  | -4.25334400 | 1.42053500  | 0.73901200  |

|           |             |             |             |
|-----------|-------------|-------------|-------------|
| F         | -5.15323200 | -0.35416200 | -0.14201500 |
| F         | -4.16775500 | 1.10725100  | -1.41767600 |
| C         | -2.77406600 | -0.25585000 | -0.06014200 |
| O         | -1.77606100 | 0.54917500  | -0.15974200 |
| O         | -2.77462700 | -1.47287200 | 0.13940600  |
| H         | -1.27208800 | -1.95809200 | 0.24245400  |
| <b>17</b> |             |             |             |
| Pd        | 0.31742700  | -0.00335700 | 0.50884000  |
| O         | 0.87657400  | 1.87087900  | -0.19602700 |
| O         | 2.35397500  | 0.29193100  | 0.17012000  |
| C         | 2.08474800  | 1.48187100  | -0.18026900 |
| C         | 3.21565500  | 2.46186200  | -0.52296300 |
| F         | 3.60164300  | 3.09025400  | 0.60063100  |
| F         | 2.79548900  | 3.37329900  | -1.40505600 |
| F         | 4.26379300  | 1.80586400  | -1.03154000 |
| C         | -3.90210800 | 0.32697300  | 0.03594800  |
| F         | -4.28476500 | 0.47489500  | 1.31408100  |
| F         | -4.80072800 | -0.43721700 | -0.59172700 |
| F         | -3.88682200 | 1.53842800  | -0.54771400 |
| C         | -2.48571300 | -0.29705200 | -0.04393200 |
| O         | -1.65450700 | 0.27227800  | 0.74163700  |
| O         | -2.29033300 | -1.22776000 | -0.83866500 |
| C         | 0.59084900  | -4.26764000 | 1.24754500  |
| C         | 0.05983800  | -2.97795300 | 0.69075100  |
| O         | 0.36357000  | -1.89888100 | 1.25855500  |
| O         | -0.68524700 | -3.08886300 | -0.35880000 |
| H         | -1.22231100 | -2.23522100 | -0.60160900 |
| H         | 1.18717000  | -4.76584100 | 0.47708000  |
| H         | -0.24493100 | -4.92884400 | 1.49238900  |
| H         | 1.20100500  | -4.08053000 | 2.12952400  |

**diaryl sulfide**

|   |             |             |             |
|---|-------------|-------------|-------------|
| S | -0.00001400 | -1.61770700 | -0.00001500 |
| C | -1.40990700 | -0.50896100 | 0.05921600  |
| C | -2.52677800 | -0.82296400 | -0.72489500 |
| C | -1.45344200 | 0.59918700  | 0.91665400  |
| C | -3.67953600 | -0.03962300 | -0.64514500 |
| H | -2.48854700 | -1.67412900 | -1.39761000 |
| C | -2.59971300 | 1.38984400  | 0.97209400  |
| H | -0.59245400 | 0.84069700  | 1.53106900  |
| C | -3.71810200 | 1.07113200  | 0.19745700  |
| H | -4.54177500 | -0.29226700 | -1.25544900 |
| H | -2.62353500 | 2.25091500  | 1.63393300  |
| H | -4.61165200 | 1.68572100  | 0.25088000  |
| C | 1.40990200  | -0.50899100 | -0.05922100 |
| C | 2.52667800  | -0.82287500 | 0.72507300  |
| C | 1.45353900  | 0.59902600  | -0.91682400 |
| C | 3.67945000  | -0.03955600 | 0.64533000  |
| H | 2.48834900  | -1.67392800 | 1.39792500  |
| C | 2.59982000  | 1.38967100  | -0.97225800 |
| H | 0.59261700  | 0.84045300  | -1.53136400 |
| C | 3.71812100  | 1.07105800  | -0.19745100 |
| H | 4.54161700  | -0.29210800 | 1.25577400  |
| H | 2.62372600  | 2.25064200  | -1.63422100 |
| H | 4.61168500  | 1.68562800  | -0.25088000 |

**pyrrolidine-2,5-dione**

|   |             |             |             |
|---|-------------|-------------|-------------|
| C | -0.76934600 | 1.25936100  | -0.00005100 |
| C | 0.76934900  | 1.25935800  | 0.00004000  |
| C | 1.17760600  | -0.21442000 | -0.00000600 |
| C | -1.17760400 | -0.21447500 | 0.00000300  |
| H | -1.20612300 | 1.74185600  | 0.87870800  |
| H | -1.20607200 | 1.74183400  | -0.87884500 |
| H | 1.20603000  | 1.74178700  | 0.87889600  |

|           |             |             |             |
|-----------|-------------|-------------|-------------|
| H         | 1.20615900  | 1.74198400  | -0.87862300 |
| O         | -2.29641700 | -0.67619800 | 0.00001200  |
| O         | 2.29639500  | -0.67621500 | -0.00002600 |
| N         | 0.00000400  | -0.95937600 | 0.00000700  |
| H         | 0.00012600  | -1.97147000 | 0.00001600  |
| <b>18</b> |             |             |             |
| Pd        | 0.54712600  | -0.12485100 | 0.63227700  |
| C         | 1.95163800  | -2.66444100 | 3.81664800  |
| C         | 1.11058900  | -1.58290300 | 3.20380000  |
| O         | 1.58644900  | -0.87337900 | 2.28976700  |
| O         | -0.09605400 | -1.46560900 | 3.67094300  |
| H         | -0.51949700 | -0.58096900 | 3.37762800  |
| O         | 0.09636000  | 1.67324900  | 1.46509600  |
| O         | -0.96320300 | 0.89163900  | 3.32537700  |
| C         | -0.88610600 | 3.24471100  | 2.90276600  |
| C         | -0.55388900 | 1.76975000  | 2.55947900  |
| F         | -1.39626000 | 3.36907400  | 4.12860800  |
| F         | -1.81239100 | 3.70758000  | 2.01765700  |
| F         | 0.19601500  | 4.02814600  | 2.80481100  |
| O         | 2.00283000  | -0.97074300 | -1.96982300 |
| O         | 1.02915800  | -1.90689500 | -0.14956300 |
| C         | 2.23536400  | -3.33955200 | -1.56809700 |
| C         | 1.73136800  | -1.91232300 | -1.23737800 |
| F         | 1.20611000  | -4.20788000 | -1.62725500 |
| F         | 3.08477800  | -3.76666100 | -0.61140600 |
| F         | 2.87600200  | -3.37043400 | -2.74096700 |
| H         | 1.85755200  | -3.55913200 | 3.19085200  |
| H         | 2.99971400  | -2.36229100 | 3.80979600  |
| H         | 1.61447600  | -2.89979700 | 4.82620300  |
| C         | -3.65140100 | 2.48275500  | -0.14733000 |
| C         | -2.99326400 | 3.60700300  | -0.96193300 |

|   |             |             |             |
|---|-------------|-------------|-------------|
| C | -1.75206300 | 2.98861300  | -1.59010900 |
| C | -2.65246500 | 1.33432700  | -0.15319600 |
| H | -3.86672600 | 2.75534900  | 0.88704900  |
| H | -4.58207000 | 2.12082800  | -0.59594900 |
| H | -2.66136000 | 4.43383600  | -0.32733900 |
| H | -3.62510200 | 4.02486200  | -1.74882000 |
| N | -1.61050800 | 1.68925000  | -1.03223300 |
| S | -0.21643000 | 0.72105700  | -1.40624400 |
| C | -0.96719500 | -0.55388400 | -2.43273500 |
| C | -0.75495800 | -0.43294000 | -3.81072700 |
| C | -1.70821200 | -1.61262500 | -1.89724500 |
| C | -1.30790000 | -1.38489600 | -4.66696000 |
| H | -0.15909700 | 0.38538600  | -4.20089000 |
| C | -2.25385200 | -2.55583100 | -2.76833800 |
| H | -1.85639800 | -1.68936100 | -0.82760600 |
| C | -2.05521000 | -2.44348100 | -4.14649600 |
| H | -1.14625800 | -1.30210800 | -5.73715800 |
| H | -2.82929200 | -3.38346600 | -2.36532100 |
| H | -2.47866000 | -3.18656700 | -4.81568300 |
| O | -2.72047800 | 0.29041800  | 0.45611900  |
| O | -1.00432600 | 3.47073800  | -2.40297700 |

**TS<sub>18-19</sub>**

|    |             |             |             |
|----|-------------|-------------|-------------|
| Pd | 0.65317900  | -0.12707900 | -0.73747000 |
| C  | 0.80675000  | -2.08642000 | 3.21844400  |
| C  | 0.55814000  | -0.94821400 | 2.26943500  |
| O  | 1.13021900  | -0.94251500 | 1.16009900  |
| O  | -0.26488300 | -0.04273800 | 2.70209700  |
| H  | -0.37925000 | 0.73899100  | 2.06304600  |
| O  | 1.08375000  | 1.81491100  | -0.26125500 |
| O  | -0.45592400 | 2.13339400  | 1.37690200  |
| C  | 0.79210700  | 4.00881400  | 0.58677600  |

|   |             |             |             |
|---|-------------|-------------|-------------|
| C | 0.41069700  | 2.50514700  | 0.57548400  |
| F | 1.65924400  | 4.22959100  | 1.59487700  |
| F | -0.29734100 | 4.76217400  | 0.79521100  |
| F | 1.36595700  | 4.39967400  | -0.55665100 |
| O | 2.73604600  | -2.00690700 | -1.29767900 |
| O | 0.47276100  | -2.04704200 | -1.28235100 |
| C | 1.57269200  | -4.10448500 | -1.60631300 |
| C | 1.66062300  | -2.57700300 | -1.36866900 |
| F | 0.86435800  | -4.36148700 | -2.73275900 |
| F | 0.95156000  | -4.71396700 | -0.58105500 |
| F | 2.78542100  | -4.64386900 | -1.74826300 |
| H | 0.06487400  | -2.86456800 | 3.00648600  |
| H | 1.79930700  | -2.50352700 | 3.04724700  |
| H | 0.68685000  | -1.76366900 | 4.25321200  |
| C | -3.75396200 | 0.41232800  | -0.30107400 |
| C | -3.63706800 | 1.77662400  | -0.99347200 |
| C | -2.24643300 | 1.76355000  | -1.63874800 |
| C | -2.32298900 | -0.12794700 | -0.30239700 |
| H | -4.13091600 | 0.44616100  | 0.72333000  |
| H | -4.37885700 | -0.29144700 | -0.86137500 |
| H | -3.65472300 | 2.60831900  | -0.28168000 |
| H | -4.39208500 | 1.97758700  | -1.75671200 |
| N | -1.56148600 | 0.65096700  | -1.17438100 |
| S | 0.39328600  | 0.80125900  | -2.80585700 |
| C | -0.43798400 | -0.08436200 | -4.06226800 |
| C | -1.04090500 | 0.73473800  | -5.04774900 |
| C | -0.45150200 | -1.48806900 | -4.20512100 |
| C | -1.60689200 | 0.15385900  | -6.17610200 |
| H | -1.06396400 | 1.80929800  | -4.90146700 |
| C | -1.03506600 | -2.05075900 | -5.33411200 |
| H | -0.03009500 | -2.11757800 | -3.43505100 |



|           |             |             |             |
|-----------|-------------|-------------|-------------|
| C         | -1.60480000 | -1.23752800 | -6.32129000 |
| H         | -2.06146400 | 0.78253900  | -6.93531300 |
| H         | -1.04372300 | -3.13042800 | -5.44585800 |
| H         | -2.05538100 | -1.68987000 | -7.19983900 |
| O         | -1.92114100 | -1.06915700 | 0.35152700  |
| O         | -1.83752400 | 2.60613300  | -2.41546900 |
| <b>19</b> |             |             |             |
| Pd        | 0.47776800  | -0.09006400 | 0.22423400  |
| C         | -0.66907800 | -2.03547100 | 4.04249900  |
| C         | -0.35650100 | -0.82815500 | 3.20822800  |
| O         | 0.51787900  | -0.87464500 | 2.32240400  |
| O         | -1.06517500 | 0.23426600  | 3.47888300  |
| H         | -0.75591000 | 1.03075600  | 2.93375800  |
| O         | 1.15468100  | 1.74821000  | 0.63175200  |
| O         | -0.23000000 | 2.37809000  | 2.33139000  |
| C         | 1.39172900  | 3.92427500  | 1.49765400  |
| C         | 0.66022100  | 2.55256100  | 1.50093000  |
| F         | 2.39612500  | 3.87233500  | 2.39618100  |
| F         | 0.54986700  | 4.89778600  | 1.86120400  |
| F         | 1.90837100  | 4.22636400  | 0.30298900  |
| O         | 2.34221500  | -1.18608200 | 0.12555400  |
| O         | 0.39334100  | -2.09622200 | -0.33070400 |
| C         | 2.31531500  | -3.54451200 | -0.49923800 |
| C         | 1.65733000  | -2.18980000 | -0.20074900 |
| F         | 2.13029900  | -3.83867800 | -1.80186600 |
| F         | 1.74898100  | -4.50812400 | 0.23896700  |
| F         | 3.62346900  | -3.51006300 | -0.24721300 |
| H         | -1.42394400 | -2.61093200 | 3.49575100  |
| H         | 0.22321200  | -2.65291300 | 4.15089600  |
| H         | -1.07130100 | -1.75007600 | 5.01511600  |
| C         | -3.80022700 | 0.16748900  | 0.41302700  |

|           |             |             |             |
|-----------|-------------|-------------|-------------|
| C         | -3.50902400 | 1.61096700  | -0.00914500 |
| C         | -1.99183700 | 1.67484100  | -0.20559400 |
| C         | -2.42386700 | -0.46171200 | 0.62123700  |
| H         | -4.37639800 | 0.07337800  | 1.33678800  |
| H         | -4.32221900 | -0.40843800 | -0.35778100 |
| H         | -3.77519700 | 2.34339200  | 0.75921100  |
| H         | -3.99768500 | 1.91905400  | -0.93672100 |
| N         | -1.45405700 | 0.45413900  | 0.20807500  |
| S         | 0.81397100  | 0.46545000  | -2.06413600 |
| C         | -0.52777900 | -0.17040400 | -2.99739900 |
| C         | -1.52769100 | 0.71866300  | -3.45127500 |
| C         | -0.56702700 | -1.52500200 | -3.39496900 |
| C         | -2.53547400 | 0.25991100  | -4.29436600 |
| H         | -1.49059000 | 1.75488600  | -3.13239400 |
| C         | -1.58814300 | -1.97531200 | -4.22508900 |
| H         | 0.19985100  | -2.20578300 | -3.04438600 |
| C         | -2.56922500 | -1.08551600 | -4.67704100 |
| H         | -3.29505900 | 0.94742500  | -4.65452200 |
| H         | -1.61778400 | -3.01736100 | -4.52826800 |
| H         | -3.35935000 | -1.44118500 | -5.33215000 |
| O         | -2.20838800 | -1.56924600 | 1.07562300  |
| O         | -1.38070100 | 2.62927700  | -0.63951800 |
| <b>20</b> |             |             |             |
| Pd        | 0.51334700  | -0.18421400 | 0.59508200  |
| O         | -0.16689800 | 1.09423000  | 2.08972900  |
| O         | 1.09254700  | -0.63028500 | 2.62349000  |
| C         | 0.26264200  | 0.75669900  | 4.44628000  |
| C         | 0.42201400  | 0.37832200  | 2.96631000  |
| F         | 0.47871600  | 2.07094700  | 4.61107700  |
| F         | 1.11636100  | 0.07541300  | 5.21182100  |
| F         | -0.99322200 | 0.47978900  | 4.84171400  |

|   |             |             |             |
|---|-------------|-------------|-------------|
| O | 1.89734800  | -0.39084800 | -2.21982000 |
| O | 1.40435600  | -1.65481100 | -0.40322400 |
| C | 2.77915500  | -2.63165200 | -2.04067000 |
| C | 1.96299800  | -1.41030200 | -1.54572900 |
| F | 1.97545300  | -3.70412600 | -2.17776900 |
| F | 3.74590900  | -2.94013700 | -1.15857100 |
| F | 3.35046800  | -2.38127800 | -3.22328000 |
| C | -3.66065600 | 2.10648800  | 0.66142500  |
| C | -3.20214200 | 3.40334000  | -0.02429200 |
| C | -1.96738500 | 3.03186800  | -0.83647300 |
| C | -2.65880000 | 1.03919200  | 0.24421000  |
| H | -3.65550800 | 2.16593900  | 1.75316900  |
| H | -4.66072000 | 1.78316700  | 0.35903600  |
| H | -2.92076300 | 4.18901700  | 0.68248500  |
| H | -3.94754700 | 3.83023500  | -0.70069200 |
| N | -1.71986200 | 1.65271200  | -0.61154100 |
| S | -0.30098300 | 0.88693500  | -1.28458300 |
| C | -1.05871600 | -0.24746900 | -2.46098800 |
| C | -1.08033000 | 0.18345000  | -3.79225200 |
| C | -1.57082800 | -1.49361500 | -2.08663000 |
| C | -1.64006400 | -0.64673500 | -4.76290100 |
| H | -0.65627900 | 1.14489500  | -4.06283100 |
| C | -2.12255700 | -2.31318700 | -3.07170400 |
| H | -1.54515700 | -1.80912200 | -1.05123500 |
| C | -2.15862500 | -1.89236300 | -4.40318600 |
| H | -1.65954900 | -0.32329600 | -5.79892600 |
| H | -2.52155500 | -3.28399000 | -2.79465600 |
| H | -2.58641200 | -2.53964800 | -5.16291200 |
| O | -2.64346100 | -0.12704600 | 0.56523700  |
| O | -1.30445200 | 3.74095700  | -1.55140100 |

TS<sub>20-21</sub>

|    |             |             |             |
|----|-------------|-------------|-------------|
| Pd | 0.66949800  | -0.26301200 | -0.69882200 |
| O  | 1.16743200  | 1.47878500  | 0.29576100  |
| O  | 1.17629600  | -0.38909200 | 1.46494200  |
| C  | 1.74131600  | 1.66950400  | 2.63629900  |
| C  | 1.35320900  | 0.85082300  | 1.39494600  |
| F  | 2.62115700  | 2.62498400  | 2.31472500  |
| F  | 2.27193800  | 0.88234300  | 3.57540700  |
| F  | 0.63543600  | 2.25314200  | 3.13602400  |
| O  | 2.68648400  | -1.99713100 | -0.92427500 |
| O  | 0.47601700  | -2.16346400 | -1.29008600 |
| C  | 1.75580700  | -4.13946900 | -1.57951700 |
| C  | 1.68437600  | -2.64052800 | -1.21276200 |
| F  | 1.44807400  | -4.29095500 | -2.89066900 |
| F  | 0.88263200  | -4.85936600 | -0.86118300 |
| F  | 2.98239300  | -4.62366000 | -1.38000200 |
| C  | -3.71910700 | 0.41600500  | -0.82603400 |
| C  | -3.25747900 | 1.82954500  | -0.44503900 |
| C  | -1.78486100 | 1.89050500  | -0.86839700 |
| C  | -2.43524800 | -0.34131500 | -1.18685200 |
| H  | -4.23668700 | -0.12334700 | -0.02896400 |
| H  | -4.37237200 | 0.40420400  | -1.70452500 |
| H  | -3.30430000 | 2.01102300  | 0.63368100  |
| H  | -3.80179100 | 2.63822400  | -0.93779900 |
| N  | -1.37375000 | 0.57247600  | -1.11134500 |
| S  | 0.33720800  | 0.71917400  | -2.77813600 |
| C  | -0.50003000 | -0.17618700 | -4.03085600 |
| C  | -1.30522400 | 0.60395400  | -4.89128700 |
| C  | -0.32505700 | -1.55192700 | -4.28150900 |
| C  | -1.90090800 | 0.01770300  | -6.00258500 |
| H  | -1.44033300 | 1.66121100  | -4.68531200 |

|           |             |             |             |
|-----------|-------------|-------------|-------------|
| C         | -0.93929300 | -2.12467800 | -5.38918000 |
| H         | 0.25821300  | -2.16106900 | -3.60648600 |
| C         | -1.72067800 | -1.34661700 | -6.25054200 |
| H         | -2.50936300 | 0.62006700  | -6.66987500 |
| H         | -0.80921000 | -3.18501200 | -5.58066600 |
| H         | -2.19296300 | -1.80563800 | -7.11398900 |
| O         | -2.35753000 | -1.50961600 | -1.49102800 |
| O         | -1.11110100 | 2.88757700  | -0.98055800 |
| <b>21</b> |             |             |             |
| Pd        | 0.23745200  | -0.04719100 | 0.29601700  |
| O         | 0.94104700  | 1.62060600  | 1.19465700  |
| O         | 0.31124000  | 0.16855500  | 2.75300500  |
| C         | 1.21054400  | 2.30954300  | 3.47361500  |
| C         | 0.79326900  | 1.25772300  | 2.42679600  |
| F         | 2.34926100  | 2.91816100  | 3.11714300  |
| F         | 1.37833200  | 1.74242500  | 4.67076400  |
| F         | 0.23953400  | 3.23785200  | 3.56889500  |
| O         | 1.90107400  | -1.42362100 | 0.31792500  |
| O         | -0.07862200 | -1.96167100 | -0.47317200 |
| C         | 1.62768100  | -3.66865100 | -0.59596700 |
| C         | 1.12661300  | -2.27092300 | -0.20344600 |
| F         | 1.78929500  | -3.69947400 | -1.93662900 |
| F         | 0.73483400  | -4.60261400 | -0.25466500 |
| F         | 2.79674800  | -3.93940800 | -0.01696100 |
| C         | -3.87514000 | 0.82250200  | 0.85089300  |
| C         | -3.46220800 | 2.18342700  | 0.27292800  |
| C         | -1.98279200 | 2.03759100  | -0.11303900 |
| C         | -2.58406200 | 0.00598600  | 0.87818400  |
| H         | -4.28264700 | 0.87203900  | 1.86400500  |
| H         | -4.60673600 | 0.29346500  | 0.23255500  |
| H         | -3.53964900 | 3.00058500  | 0.99643500  |

|           |             |             |             |
|-----------|-------------|-------------|-------------|
| H         | -4.02666100 | 2.48249900  | -0.61421400 |
| N         | -1.57639500 | 0.76558400  | 0.27712900  |
| S         | 0.91903500  | 0.63593000  | -1.87828400 |
| C         | -0.32631300 | 0.23832000  | -3.02870600 |
| C         | -1.21321900 | 1.25105600  | -3.46779900 |
| C         | -0.39104800 | -1.05197200 | -3.60828600 |
| C         | -2.12765400 | 0.97669800  | -4.47817900 |
| H         | -1.16409000 | 2.22722000  | -2.99774000 |
| C         | -1.31854700 | -1.31510300 | -4.60785400 |
| H         | 0.28551500  | -1.82425300 | -3.26118400 |
| C         | -2.18291900 | -0.30273800 | -5.04428500 |
| H         | -2.80046200 | 1.75446500  | -4.82623200 |
| H         | -1.36971100 | -2.30349300 | -5.05356800 |
| H         | -2.90235400 | -0.51300400 | -5.83053800 |
| O         | -2.43275300 | -1.11002600 | 1.33143500  |
| O         | -1.31244700 | 2.88352500  | -0.66833200 |
| <b>4'</b> |             |             |             |
| Pd        | 0.25913400  | 0.35746700  | 0.32588800  |
| C         | 3.57683600  | -1.62265600 | 2.66589900  |
| C         | 2.53033800  | -0.59596100 | 2.31298700  |
| O         | 2.22047100  | -0.40085100 | 1.12073600  |
| O         | 2.00453700  | 0.01780200  | 3.33117400  |
| H         | 1.39453900  | 0.81217600  | 3.07936100  |
| O         | 0.61671100  | 2.35873200  | 0.69513200  |
| O         | 0.73714500  | 2.16238200  | 2.95563300  |
| C         | 0.63993800  | 4.34033100  | 1.96317500  |
| C         | 0.67883600  | 2.79316900  | 1.88594500  |
| F         | 0.97267600  | 4.78607400  | 3.18204300  |
| F         | -0.60498700 | 4.77516200  | 1.68230400  |
| F         | 1.48511300  | 4.89069200  | 1.07228100  |
| H         | 4.47749900  | -1.43459800 | 2.07508900  |

|   |             |             |             |
|---|-------------|-------------|-------------|
| H | 3.81513800  | -1.59377400 | 3.72865400  |
| H | 3.20129400  | -2.61458400 | 2.39533200  |
| C | -3.90882500 | 1.12374600  | -0.13431100 |
| C | -2.67924100 | 0.64955500  | 0.33887400  |
| C | -1.50231000 | 0.95517300  | -0.35247300 |
| C | -1.55398900 | 1.74778700  | -1.50403700 |
| C | -2.78716500 | 2.21064000  | -1.97471200 |
| C | -3.96570400 | 1.89891800  | -1.29299500 |
| H | -4.81934100 | 0.88657800  | 0.41016300  |
| H | -2.65104900 | 0.05314200  | 1.24727500  |
| H | -0.64020500 | 2.01366200  | -2.02721600 |
| H | -2.82139400 | 2.82590800  | -2.87036000 |
| H | -4.92099300 | 2.26574600  | -1.65784100 |
| C | 3.17160200  | -2.41893300 | -2.41218600 |
| C | 3.35199400  | -3.53837400 | -1.37577000 |
| C | 2.15621000  | -3.42991700 | -0.43750200 |
| C | 1.84321200  | -1.75477600 | -2.07633800 |
| H | 3.95052300  | -1.65288400 | -2.35874100 |
| H | 3.13800100  | -2.77466700 | -3.44542300 |
| H | 4.26651700  | -3.44617600 | -0.78454300 |
| H | 3.35284600  | -4.54006400 | -1.81586300 |
| N | 1.30800400  | -2.42577300 | -0.95404500 |
| S | -0.10584600 | -1.91767400 | -0.07776900 |
| C | -1.43195500 | -2.43889200 | -1.17162900 |
| C | -2.16989200 | -3.55403300 | -0.75540100 |
| C | -1.74058500 | -1.76752400 | -2.36065400 |
| C | -3.22965200 | -4.00462700 | -1.54370100 |
| H | -1.91448200 | -4.06019500 | 0.17017500  |
| C | -2.79673200 | -2.23501000 | -3.14107600 |
| H | -1.16410500 | -0.90231000 | -2.66021600 |
| C | -3.54026300 | -3.34666600 | -2.73477300 |

|                         |             |             |             |
|-------------------------|-------------|-------------|-------------|
| H                       | -3.80756100 | -4.86722500 | -1.22655700 |
| H                       | -3.04533200 | -1.72098700 | -4.06444100 |
| H                       | -4.36572300 | -3.69794100 | -3.34698400 |
| O                       | 1.31964000  | -0.82684100 | -2.64601000 |
| O                       | 1.94582700  | -4.06839300 | 0.56658000  |
| <b>TS<sub>4-5</sub></b> |             |             |             |
| Pd                      | 0.26549500  | 0.53692700  | 0.50837400  |
| C                       | 3.33693600  | -1.24646100 | 3.39800600  |
| C                       | 2.30420600  | -0.28226500 | 2.87956000  |
| O                       | 2.17643300  | -0.06527200 | 1.66836000  |
| O                       | 1.58828000  | 0.30589000  | 3.81193200  |
| H                       | 1.04131300  | 1.05885900  | 3.41880000  |
| O                       | 0.82149800  | 2.53912500  | 0.68449700  |
| O                       | 0.39949200  | 2.43730300  | 2.90823500  |
| C                       | 0.92753900  | 4.55433000  | 1.90017600  |
| C                       | 0.69830700  | 3.02283300  | 1.85383400  |
| F                       | 1.00752500  | 5.00564400  | 3.15870800  |
| F                       | -0.09493300 | 5.18678700  | 1.29072900  |
| F                       | 2.06508500  | 4.88846700  | 1.26300400  |
| H                       | 3.57007800  | -1.97630300 | 2.62265600  |
| H                       | 4.24598700  | -0.68780500 | 3.64712000  |
| H                       | 2.98492500  | -1.73440500 | 4.30886400  |
| C                       | -3.79433500 | 1.62100400  | 0.77943000  |
| C                       | -2.54634400 | 1.00938400  | 0.95846900  |
| C                       | -1.54040600 | 1.23620700  | 0.01387300  |
| C                       | -1.75419300 | 2.04679700  | -1.09873900 |
| C                       | -3.01082100 | 2.64220100  | -1.26327400 |
| C                       | -4.02874200 | 2.43204400  | -0.33061500 |
| H                       | -4.57707300 | 1.45182500  | 1.51392700  |
| H                       | -2.37614300 | 0.38371300  | 1.82810600  |
| H                       | -0.96266100 | 2.20590300  | -1.81886700 |



|           |             |             |             |
|-----------|-------------|-------------|-------------|
| H         | -3.18257100 | 3.28189600  | -2.12485200 |
| H         | -4.99902000 | 2.90074900  | -0.46709400 |
| C         | 2.75143100  | -0.32041300 | -3.09798600 |
| C         | 3.54875400  | -1.20121500 | -2.12911500 |
| C         | 2.56643500  | -1.50486600 | -0.99146300 |
| C         | 1.52023100  | 0.11054900  | -2.29433500 |
| H         | 3.27804100  | 0.56782000  | -3.45432800 |
| H         | 2.40333900  | -0.87131200 | -3.97830000 |
| H         | 4.40296100  | -0.67139100 | -1.69426100 |
| H         | 3.91904100  | -2.13840500 | -2.55009600 |
| N         | 1.49949000  | -0.61265600 | -1.10502000 |
| S         | -0.17495700 | -1.68637000 | 0.32130000  |
| C         | -1.08002400 | -2.31048100 | -1.05196400 |
| C         | -0.75734600 | -3.63200800 | -1.43090600 |
| C         | -2.10961900 | -1.62049100 | -1.72008100 |
| C         | -1.46571000 | -4.25453800 | -2.45332600 |
| H         | 0.05010800  | -4.14827800 | -0.92141100 |
| C         | -2.79991200 | -2.25210000 | -2.75042000 |
| H         | -2.35658800 | -0.60692500 | -1.43400900 |
| C         | -2.48567000 | -3.56495900 | -3.11627500 |
| H         | -1.21784300 | -5.27214200 | -2.73931800 |
| H         | -3.59187100 | -1.71847300 | -3.26693500 |
| H         | -3.03558500 | -4.04993600 | -3.91746000 |
| O         | 0.70655000  | 0.93863300  | -2.65205700 |
| O         | 2.70758000  | -2.38145700 | -0.16458200 |
| <b>5'</b> |             |             |             |
| Pd        | 0.35146300  | 0.18275300  | 0.15189200  |
| C         | 3.60670400  | -1.59325400 | 2.82567300  |
| C         | 2.41061800  | -0.79938900 | 2.38593100  |
| O         | 2.28943500  | -0.38061000 | 1.23085300  |
| O         | 1.50738700  | -0.62106300 | 3.33603400  |

|   |             |             |             |
|---|-------------|-------------|-------------|
| H | 0.76444100  | -0.06223700 | 2.99434200  |
| O | 0.99231500  | 2.55808700  | 0.90348000  |
| O | -0.21370100 | 1.03798200  | 2.00991900  |
| C | 0.12002100  | 3.14011500  | 3.08965500  |
| C | 0.35079700  | 2.20499100  | 1.88702000  |
| F | 0.54430600  | 2.54533400  | 4.22352800  |
| F | -1.19662100 | 3.39701200  | 3.21889900  |
| F | 0.76829200  | 4.29686000  | 2.94772000  |
| H | 3.36225400  | -2.65681800 | 2.72770700  |
| H | 4.45362000  | -1.37244900 | 2.17653300  |
| H | 3.84776200  | -1.39122700 | 3.87049700  |
| C | -3.38366100 | 2.02436500  | -0.77847000 |
| C | -2.24626400 | 1.54832500  | -0.11409000 |
| C | -1.34326800 | 0.74513600  | -0.81066400 |
| C | -1.58431600 | 0.36974600  | -2.13116300 |
| C | -2.72340400 | 0.85424800  | -2.77941000 |
| C | -3.62253400 | 1.68491100  | -2.10895100 |
| H | -4.08218900 | 2.65690900  | -0.23770500 |
| H | -2.09650200 | 1.79777600  | 0.92772700  |
| H | -0.90616900 | -0.28855500 | -2.65709600 |
| H | -2.90105900 | 0.57546600  | -3.81449200 |
| H | -4.50681300 | 2.05705600  | -2.61796200 |
| C | 2.66336500  | -0.03517700 | -3.41779100 |
| C | 2.86626700  | -1.48032300 | -2.95055900 |
| C | 1.97212200  | -1.63343100 | -1.71186100 |
| C | 1.68916400  | 0.55730400  | -2.40002800 |
| H | 3.57793700  | 0.56386000  | -3.41965200 |
| H | 2.22270400  | 0.04625100  | -4.41621800 |
| H | 3.89536600  | -1.70561700 | -2.65662600 |
| H | 2.57172700  | -2.23099800 | -3.68994700 |
| N | 1.27697500  | -0.44709500 | -1.52363500 |

|               |             |             |             |
|---------------|-------------|-------------|-------------|
| S             | -0.75715300 | -1.77397000 | 0.81924800  |
| C             | -1.61026600 | -2.66583000 | -0.43166600 |
| C             | -0.98366200 | -3.73772800 | -1.09985100 |
| C             | -2.97984000 | -2.40721600 | -0.65432900 |
| C             | -1.72426300 | -4.54011300 | -1.96453700 |
| H             | 0.07393100  | -3.90750900 | -0.93709200 |
| C             | -3.70961100 | -3.21735100 | -1.51751800 |
| H             | -3.45032300 | -1.57533800 | -0.14176600 |
| C             | -3.08287900 | -4.28322200 | -2.17313500 |
| H             | -1.24313800 | -5.36921800 | -2.47505900 |
| H             | -4.76479800 | -3.02073900 | -1.68177400 |
| H             | -3.65551100 | -4.91391000 | -2.84744800 |
| O             | 1.31846300  | 1.71495200  | -2.34770300 |
| O             | 1.90674400  | -2.64140400 | -1.03107100 |
| <b>TS4-6'</b> |             |             |             |
| Pd            | -0.06554600 | 0.01855400  | -0.14541000 |
| C             | 4.12884600  | 0.08045400  | 1.10804600  |
| C             | 2.82569900  | -0.49972600 | 0.64609300  |
| O             | 2.05591600  | 0.16022000  | -0.06223900 |
| O             | 2.58347400  | -1.71897600 | 1.08488200  |
| H             | 1.77295600  | -2.11164000 | 0.67191100  |
| O             | -0.02777000 | 2.05640300  | 0.09875100  |
| O             | 0.72096200  | 1.70254500  | 2.21115300  |
| C             | 0.51777500  | 3.95312900  | 1.37514100  |
| C             | 0.40521000  | 2.41072800  | 1.26101000  |
| F             | 0.91079400  | 4.33085700  | 2.60004500  |
| F             | -0.66794900 | 4.54537400  | 1.11982100  |
| F             | 1.41623100  | 4.42921300  | 0.48708600  |
| H             | 4.53509400  | 0.72649500  | 0.32867600  |
| H             | 3.91752800  | 0.70200400  | 1.98544600  |
| H             | 4.83889600  | -0.69964600 | 1.38266100  |

|   |             |             |             |
|---|-------------|-------------|-------------|
| C | -3.84331500 | 0.46044300  | 1.37145400  |
| C | -2.68650000 | -0.27426400 | 1.13596500  |
| C | -2.15681700 | -0.37169300 | -0.17437200 |
| C | -2.83528600 | 0.25506300  | -1.24483800 |
| C | -3.99327900 | 0.98493800  | -1.00197700 |
| C | -4.49237000 | 1.08832200  | 0.30254500  |
| H | -4.24106400 | 0.54459400  | 2.37788600  |
| H | -2.18251400 | -0.77720600 | 1.95647800  |
| H | -2.44858400 | 0.16883500  | -2.25458400 |
| H | -4.50777300 | 1.47791800  | -1.82114400 |
| H | -5.39866200 | 1.65865500  | 0.48554800  |
| C | 2.29912200  | -4.86742900 | -1.51978400 |
| C | 1.58509100  | -5.62152300 | -0.39222600 |
| C | 0.56920900  | -4.61222200 | 0.16424300  |
| C | 1.73795200  | -3.44066600 | -1.44710600 |
| H | 3.38726100  | -4.83036800 | -1.41891300 |
| H | 2.08288000  | -5.26933300 | -2.51482800 |
| H | 2.25582000  | -5.92217400 | 0.41878600  |
| H | 1.05222700  | -6.51926500 | -0.71691000 |
| N | 0.78662000  | -3.36462700 | -0.43115800 |
| S | -0.95018800 | -2.03532400 | -0.40092200 |
| C | -1.31589300 | -2.40561000 | -2.12422300 |
| C | -2.24449700 | -3.42557200 | -2.36326800 |
| C | -0.70090200 | -1.72604500 | -3.18111700 |
| C | -2.57231500 | -3.75466300 | -3.67875700 |
| H | -2.69956600 | -3.95292200 | -1.53060900 |
| C | -1.03663000 | -2.06796300 | -4.49207900 |
| H | 0.04260200  | -0.96432400 | -2.97681400 |
| C | -1.97134500 | -3.07549000 | -4.74133700 |
| H | -3.29526800 | -4.54157500 | -3.87128000 |
| H | -0.55970700 | -1.54839200 | -5.31750300 |

|           |             |             |             |
|-----------|-------------|-------------|-------------|
| H         | -2.22803800 | -3.33480200 | -5.76419200 |
| O         | 2.08297600  | -2.51056000 | -2.15606700 |
| O         | -0.28549900 | -4.85336900 | 0.99443300  |
| <b>6'</b> |             |             |             |
| Pd        | -0.14816100 | 0.92932800  | 0.56565200  |
| C         | 3.82926400  | -0.50829600 | 0.00988600  |
| C         | 2.30821700  | -0.53823800 | 0.11076000  |
| O         | 1.80823000  | 0.67085900  | 0.22034200  |
| O         | 1.68164300  | -1.59730300 | 0.09433600  |
| O         | 0.28443800  | 2.88544500  | 0.89408700  |
| O         | -0.53744500 | 2.70670300  | 3.00379400  |
| C         | 0.34511100  | 4.81303600  | 2.23445800  |
| C         | -0.01341900 | 3.31229200  | 2.07556300  |
| F         | 0.14200700  | 5.23423400  | 3.49029400  |
| F         | -0.42918600 | 5.56186200  | 1.41689400  |
| F         | 1.63087700  | 5.04831700  | 1.91713200  |
| H         | 4.14936600  | 0.23686400  | -0.72207200 |
| H         | 4.24503000  | -0.21580400 | 0.97893900  |
| H         | 4.19877600  | -1.49721700 | -0.26238200 |
| C         | -3.29634600 | 1.91745600  | 1.48999300  |
| C         | -2.42523200 | 0.80883700  | 1.42736500  |
| C         | -2.39182400 | 0.02430700  | 0.24597100  |
| C         | -3.24075500 | 0.32633800  | -0.83652400 |
| C         | -4.11024600 | 1.40075600  | -0.72948700 |
| C         | -4.12966300 | 2.20858900  | 0.42353600  |
| H         | -3.29408100 | 2.52416000  | 2.38862300  |
| H         | -1.89374000 | 0.51335500  | 2.32850900  |
| H         | -3.20644400 | -0.27276600 | -1.73892000 |
| H         | -4.77542900 | 1.62960300  | -1.55696800 |
| H         | -4.80454800 | 3.05700300  | 0.47468700  |
| S         | -1.03840600 | -1.17376200 | 0.21810700  |

|          |             |             |             |
|----------|-------------|-------------|-------------|
| C        | -0.98084300 | -1.68850700 | -1.50437700 |
| C        | -1.54054300 | -2.92987400 | -1.82006400 |
| C        | -0.36550200 | -0.90164000 | -2.48301600 |
| C        | -1.50059100 | -3.37907900 | -3.14145000 |
| H        | -1.99353600 | -3.54023900 | -1.04501500 |
| C        | -0.33103500 | -1.36280400 | -3.79831300 |
| H        | 0.08653900  | 0.04716800  | -2.21319200 |
| C        | -0.89842500 | -2.59691900 | -4.12789600 |
| H        | -1.93343000 | -4.34199000 | -3.39423800 |
| H        | 0.14759000  | -0.75988800 | -4.56382100 |
| H        | -0.86349200 | -2.95169600 | -5.15351600 |
| $7_{en}$ |             |             |             |
| Pd       | -0.27645300 | 0.73772400  | 0.30763400  |
| O        | 0.12489200  | 2.76604300  | 0.84591300  |
| O        | 1.87582100  | 1.44309500  | 0.50087500  |
| C        | 2.31107000  | 3.76922200  | 0.97804100  |
| C        | 1.37577300  | 2.56385600  | 0.77539000  |
| F        | 3.48564500  | 3.38396300  | 1.50131300  |
| F        | 1.76618700  | 4.68688600  | 1.78758600  |
| F        | 2.55347500  | 4.34886100  | -0.21598000 |
| C        | -4.37628700 | -0.10495300 | 1.21868300  |
| C        | -2.98504600 | -0.22481400 | 1.11631500  |
| C        | -2.25250800 | 0.73593200  | 0.40908800  |
| C        | -2.91359000 | 1.81453700  | -0.19137500 |
| C        | -4.30433000 | 1.92157100  | -0.09018600 |
| C        | -5.03770200 | 0.96325500  | 0.61284500  |
| H        | -4.93708700 | -0.85035600 | 1.77667000  |
| H        | -2.48696400 | -1.05713600 | 1.60711000  |
| H        | -2.35115700 | 2.57955600  | -0.71919400 |
| H        | -4.81074500 | 2.76260500  | -0.55667800 |
| H        | -6.11730200 | 1.05249100  | 0.69237200  |

|   |             |             |             |
|---|-------------|-------------|-------------|
| C | 3.56722700  | -1.22198400 | -1.60331900 |
| C | 3.69417700  | -2.40225200 | -0.62626000 |
| C | 2.30190600  | -2.61604000 | -0.04387600 |
| C | 2.08700900  | -0.87507500 | -1.64539000 |
| H | 4.09520500  | -0.32799600 | -1.25791300 |
| H | 3.91678700  | -1.44082100 | -2.61524300 |
| H | 4.38878900  | -2.21734100 | 0.19708900  |
| H | 4.00779000  | -3.33177400 | -1.11086600 |
| N | 1.43975800  | -1.69442000 | -0.68768400 |
| S | -0.21239500 | -1.51112000 | -0.19331900 |
| C | -1.11685100 | -2.00555300 | -1.66737400 |
| C | -1.49523300 | -3.35135200 | -1.74753300 |
| C | -1.46417100 | -1.09203200 | -2.66773700 |
| C | -2.22180700 | -3.78858800 | -2.85524400 |
| H | -1.22586500 | -4.04161100 | -0.95413600 |
| C | -2.19529000 | -1.54276300 | -3.76615300 |
| H | -1.15584200 | -0.05724200 | -2.58547000 |
| C | -2.57147800 | -2.88519500 | -3.86089500 |
| H | -2.51977600 | -4.83010500 | -2.92642400 |
| H | -2.47028500 | -0.84259800 | -4.54885900 |
| H | -3.14252200 | -3.22685300 | -4.71914300 |
| O | 1.52941300  | -0.06511400 | -2.34556200 |
| O | 1.95808600  | -3.41254600 | 0.79422500  |

**TS<sub>7-9en</sub>**

|    |             |            |            |
|----|-------------|------------|------------|
| Pd | -0.08167900 | 0.19450800 | 0.41100500 |
| O  | 0.53152200  | 2.13751700 | 0.92215500 |
| O  | 2.03787600  | 0.67470500 | 1.68251000 |
| C  | 2.49897200  | 3.03211800 | 1.94010100 |
| C  | 1.63043800  | 1.83388100 | 1.50649900 |
| F  | 3.39768700  | 2.67616600 | 2.86701300 |
| F  | 1.75197100  | 4.03147500 | 2.43564900 |

|   |             |             |             |
|---|-------------|-------------|-------------|
| F | 3.16939200  | 3.50331000  | 0.86484100  |
| C | -4.20911400 | 1.12006600  | 0.53046500  |
| C | -2.97442300 | 0.49050300  | 0.74107300  |
| C | -1.89140700 | 0.86548700  | -0.05739800 |
| C | -2.01129700 | 1.81688100  | -1.06918400 |
| C | -3.25630900 | 2.42378100  | -1.26771700 |
| C | -4.35163200 | 2.07929800  | -0.47136500 |
| H | -5.05576500 | 0.84508700  | 1.15363700  |
| H | -2.87425400 | -0.25678300 | 1.52018500  |
| H | -1.15893900 | 2.07805000  | -1.68509700 |
| H | -3.36027400 | 3.17465100  | -2.04622000 |
| H | -5.31328100 | 2.55722600  | -0.63324800 |
| C | 2.82399500  | -0.42299400 | -2.81111600 |
| C | 3.57066900  | -1.20125900 | -1.71683700 |
| C | 2.48618400  | -1.58719600 | -0.70433600 |
| C | 1.45741800  | -0.11097000 | -2.19526600 |
| H | 3.30319800  | 0.50981900  | -3.11706300 |
| H | 2.66030700  | -1.01986000 | -3.71484400 |
| H | 4.30304300  | -0.57974000 | -1.19136200 |
| H | 4.08428400  | -2.10228600 | -2.05890500 |
| N | 1.35318300  | -0.82163700 | -1.00423600 |
| S | -0.43274300 | -2.01921600 | 0.06757800  |
| C | -1.16906800 | -2.56090700 | -1.43593600 |
| C | -0.92192000 | -3.90954600 | -1.77264100 |
| C | -1.99693000 | -1.77120400 | -2.25659700 |
| C | -1.51160300 | -4.46105000 | -2.90560000 |
| H | -0.27034800 | -4.50711900 | -1.14276900 |
| C | -2.56347000 | -2.33223300 | -3.39658500 |
| H | -2.18372600 | -0.73617600 | -2.00247700 |
| C | -2.32953400 | -3.67313400 | -3.72067200 |
| H | -1.32559400 | -5.50036800 | -3.15809200 |



|                            |             |             |             |
|----------------------------|-------------|-------------|-------------|
| H                          | -3.19724100 | -1.72175700 | -4.03237700 |
| H                          | -2.78469200 | -4.10274100 | -4.60812200 |
| O                          | 0.61137400  | 0.62878500  | -2.66023100 |
| O                          | 2.58867300  | -2.40498300 | 0.18057300  |
| <b>TS<sub>7-10en</sub></b> |             |             |             |
| Pd                         | 0.77636800  | -0.89767300 | -1.09318300 |
| O                          | 3.15300600  | -3.03978300 | -0.87122100 |
| O                          | 2.81780100  | -0.81091300 | -1.19506300 |
| C                          | 3.52061800  | -1.88886500 | -1.06859700 |
| C                          | 5.03436200  | -1.57658000 | -1.20188900 |
| F                          | 5.42450300  | -0.69356200 | -0.25914400 |
| F                          | 5.30531300  | -1.03799600 | -2.40940900 |
| F                          | 5.78130800  | -2.68141200 | -1.06629300 |
| C                          | 0.88582100  | 1.45819600  | 0.59798400  |
| C                          | 1.03569200  | 2.82614800  | 0.82448400  |
| C                          | 0.72801800  | 3.74741900  | -0.18472800 |
| C                          | 0.26270300  | 3.30754500  | -1.42504100 |
| C                          | 0.09894000  | 1.93919500  | -1.66622700 |
| C                          | 0.49164600  | 1.03158800  | -0.67755600 |
| H                          | 1.12324200  | 0.73948100  | 1.37555900  |
| H                          | 1.39104100  | 3.17273600  | 1.79059000  |
| H                          | 0.83009400  | 4.81142600  | 0.00744400  |
| H                          | 0.00421400  | 4.02338400  | -2.20003500 |
| H                          | -0.29708400 | 1.59907600  | -2.61778800 |
| C                          | 0.30886100  | -5.18948900 | -1.31781300 |
| C                          | 0.66897100  | -4.94273400 | 0.15666300  |
| C                          | 0.36122100  | -3.46696400 | 0.39488500  |
| C                          | 0.01694700  | -3.80274700 | -1.89777800 |
| H                          | 1.11378000  | -5.64674900 | -1.89777000 |
| H                          | -0.58528500 | -5.80834600 | -1.44719400 |
| H                          | 1.73905900  | -5.06902100 | 0.34299400  |

|                       |             |             |             |
|-----------------------|-------------|-------------|-------------|
| H                     | 0.11802600  | -5.55781800 | 0.87223100  |
| N                     | 0.11830100  | -2.87623000 | -0.85311800 |
| S                     | -1.50081700 | -1.04246500 | -0.85849400 |
| C                     | -2.30229600 | -0.96334600 | -2.41238800 |
| C                     | -3.70113900 | -1.16472900 | -2.41297000 |
| C                     | -1.63289900 | -0.69622700 | -3.62601800 |
| C                     | -4.41419300 | -1.07044300 | -3.60229800 |
| H                     | -4.21127100 | -1.38596300 | -1.48062300 |
| C                     | -2.35627100 | -0.62121700 | -4.80907300 |
| H                     | -0.55426900 | -0.58683500 | -3.62811800 |
| C                     | -3.74501000 | -0.80023000 | -4.80064200 |
| H                     | -5.48985300 | -1.21624100 | -3.59875500 |
| H                     | -1.83823500 | -0.42846100 | -5.74322300 |
| H                     | -4.30373200 | -0.73570900 | -5.72939500 |
| O                     | -0.23967500 | -3.53392100 | -3.05259800 |
| O                     | 0.34758300  | -2.87362900 | 1.45213700  |
| <b>9<sub>en</sub></b> |             |             |             |
| Pd                    | 0.19161100  | -0.09163700 | 0.47902200  |
| O                     | 0.35154900  | 1.65442400  | 1.79005200  |
| O                     | 1.81030700  | 0.01166400  | 2.10666200  |
| C                     | 1.96297000  | 1.92974000  | 3.56138300  |
| C                     | 1.34775800  | 1.14466900  | 2.38949300  |
| F                     | 1.38027000  | 1.52271000  | 4.71089200  |
| F                     | 1.76272000  | 3.24650800  | 3.43513000  |
| F                     | 3.27946200  | 1.70208200  | 3.65635800  |
| C                     | -3.35605300 | 1.85579200  | -0.57262900 |
| C                     | -2.19910500 | 1.38727000  | 0.06356900  |
| C                     | -1.40051200 | 0.45709700  | -0.60438400 |
| C                     | -1.69727800 | 0.01730100  | -1.89141100 |
| C                     | -2.84965000 | 0.50836900  | -2.51395800 |
| C                     | -3.68015900 | 1.41973400  | -1.85706700 |

|                        |             |             |             |
|------------------------|-------------|-------------|-------------|
| H                      | -3.98726300 | 2.57555700  | -0.05909600 |
| H                      | -1.92686400 | 1.76184300  | 1.04493000  |
| H                      | -1.06146400 | -0.69997900 | -2.39656500 |
| H                      | -3.09499900 | 0.16903200  | -3.51665300 |
| H                      | -4.57295900 | 1.79445600  | -2.34905700 |
| C                      | 3.22020000  | 1.43012700  | -2.23259700 |
| C                      | 2.75596400  | 0.18469200  | -2.99532500 |
| C                      | 1.69262700  | -0.45733700 | -2.10178000 |
| C                      | 2.33972400  | 1.47954700  | -0.98143300 |
| H                      | 4.26525700  | 1.38124600  | -1.91329700 |
| H                      | 3.09420800  | 2.36470200  | -2.78571300 |
| H                      | 3.54486500  | -0.55036000 | -3.17597300 |
| H                      | 2.29618900  | 0.41027400  | -3.96230200 |
| N                      | 1.49703400  | 0.35446800  | -0.99821300 |
| S                      | -0.04362900 | -2.32937100 | 0.32031700  |
| C                      | -1.34230900 | -3.02246300 | -0.64445700 |
| C                      | -1.01991200 | -3.88361300 | -1.71104400 |
| C                      | -2.68990400 | -2.82920700 | -0.28137700 |
| C                      | -2.03551100 | -4.54005800 | -2.40055700 |
| H                      | 0.01867800  | -4.00943700 | -1.99420200 |
| C                      | -3.69597100 | -3.49819700 | -0.97098000 |
| H                      | -2.93097400 | -2.16355700 | 0.54033300  |
| C                      | -3.37108700 | -4.35154700 | -2.03080000 |
| H                      | -1.78714100 | -5.20037800 | -3.22591600 |
| H                      | -4.73338700 | -3.35455600 | -0.68468200 |
| H                      | -4.15971700 | -4.86992000 | -2.56844900 |
| O                      | 2.38176700  | 2.33456600  | -0.12647800 |
| O                      | 1.12768100  | -1.51024300 | -2.34888000 |
| <b>10<sub>en</sub></b> |             |             |             |
| Pd                     | -0.20437100 | 0.10492900  | 0.67077000  |
| O                      | 2.56923300  | -1.95064500 | 0.51901800  |

|   |             |             |             |
|---|-------------|-------------|-------------|
| O | 1.79501600  | 0.20094300  | 0.65249800  |
| C | 2.68585000  | -0.74226500 | 0.59387300  |
| C | 4.10358000  | -0.10233300 | 0.64329900  |
| F | 4.28392700  | 0.56252900  | 1.80551300  |
| F | 4.27133000  | 0.78015000  | -0.36410700 |
| F | 5.06283700  | -1.02987200 | 0.54490700  |
| C | -0.50524300 | 2.42821500  | 1.68168300  |
| C | 0.46917400  | 3.43573900  | 1.57382400  |
| C | 0.53755200  | 4.22136700  | 0.43233400  |
| C | -0.37094100 | 4.01882800  | -0.61992100 |
| C | -1.33166300 | 3.01974900  | -0.55034800 |
| C | -1.39364600 | 2.21464400  | 0.60185100  |
| H | -0.61947300 | 1.88462700  | 2.61579100  |
| H | 1.15915300  | 3.59191100  | 2.39615000  |
| H | 1.29152700  | 4.99762500  | 0.35160300  |
| H | -0.31601800 | 4.64147200  | -1.50765900 |
| H | -2.01665500 | 2.84764900  | -1.37236900 |
| C | 0.09946100  | -3.98732400 | -0.49495700 |
| C | -0.03629500 | -4.12985300 | 1.02916000  |
| C | -0.26731600 | -2.70296400 | 1.53229700  |
| C | -0.13816500 | -2.50207400 | -0.76835400 |
| H | 1.10250200  | -4.23023700 | -0.85571000 |
| H | -0.61464900 | -4.58589400 | -1.06783300 |
| H | 0.86345300  | -4.51949400 | 1.51146500  |
| H | -0.87621300 | -4.75995500 | 1.33773500  |
| N | -0.35135500 | -1.86396900 | 0.43284400  |
| S | -2.46888500 | 0.77044600  | 0.77999900  |
| C | -3.31413500 | 0.62370700  | -0.80182100 |
| C | -4.61508700 | 1.14068200  | -0.87461800 |
| C | -2.72428100 | -0.02663900 | -1.89230000 |
| C | -5.32744600 | 1.02401300  | -2.06761600 |

|           |             |             |             |
|-----------|-------------|-------------|-------------|
| H         | -5.06267600 | 1.62378100  | -0.01141300 |
| C         | -3.45637100 | -0.13749400 | -3.07676300 |
| H         | -1.72727200 | -0.45886200 | -1.82711700 |
| C         | -4.74744500 | 0.38644200  | -3.16734500 |
| H         | -6.33417100 | 1.42489000  | -2.13388500 |
| H         | -3.00891500 | -0.64481500 | -3.92574000 |
| H         | -5.30708400 | 0.29134400  | -4.09315800 |
| O         | -0.15482100 | -1.96380000 | -1.86811200 |
| O         | -0.37721700 | -2.34900200 | 2.69326900  |
| <b>8'</b> |             |             |             |
| Pd        | 0.31748000  | 0.08913300  | 0.04406300  |
| O         | 2.47487300  | -0.67922000 | 1.97432000  |
| O         | 2.34904700  | 0.21050400  | -0.11106300 |
| C         | 2.95589100  | -0.24835200 | 0.93252200  |
| C         | 4.49510500  | -0.19838000 | 0.75438000  |
| F         | 4.91739800  | 1.07616800  | 0.62026200  |
| F         | 4.87633000  | -0.87730900 | -0.34853400 |
| F         | 5.13276800  | -0.73448900 | 1.80557700  |
| C         | 0.74914100  | 2.34193400  | 1.84937200  |
| C         | 0.72053900  | 3.68007100  | 2.25578400  |
| C         | 0.22762200  | 4.67003200  | 1.40287100  |
| C         | -0.23821600 | 4.32047200  | 0.13544900  |
| C         | -0.21989300 | 2.98305400  | -0.28017900 |
| C         | 0.27027600  | 1.99610500  | 0.58072600  |
| H         | 1.15836900  | 1.57960300  | 2.50504600  |
| H         | 1.09599500  | 3.94584000  | 3.24059100  |
| H         | 0.21272900  | 5.70822800  | 1.72227000  |
| H         | -0.61545200 | 5.08494900  | -0.53918200 |
| H         | -0.57873300 | 2.72859400  | -1.27348200 |
| C         | -1.23027700 | -4.12324400 | -0.09664900 |
| C         | -2.71651400 | -4.16030400 | 0.30808100  |

|   |             |             |             |
|---|-------------|-------------|-------------|
| C | -3.15375900 | -2.70318300 | 0.41384200  |
| C | -0.87234600 | -2.65186400 | -0.15754400 |
| H | -0.56587700 | -4.61231600 | 0.62105900  |
| H | -1.03353600 | -4.57170600 | -1.07486600 |
| H | -2.88617600 | -4.64169800 | 1.27537900  |
| H | -3.35576100 | -4.66632900 | -0.42011900 |
| N | -2.00989300 | -1.91122700 | 0.13566400  |
| S | -2.00070300 | -0.15492000 | 0.20327000  |
| C | -2.78254200 | 0.25306500  | -1.36750900 |
| C | -4.17090000 | 0.43618900  | -1.37113200 |
| C | -2.02521200 | 0.42155400  | -2.53422700 |
| C | -4.80579000 | 0.78288200  | -2.56421000 |
| H | -4.73952200 | 0.29267700  | -0.45888700 |
| C | -2.67403700 | 0.76779400  | -3.71908800 |
| H | -0.94686600 | 0.29572800  | -2.50295900 |
| C | -4.05990300 | 0.94815000  | -3.73332100 |
| H | -5.88182900 | 0.92556700  | -2.57779000 |
| H | -2.09533300 | 0.90415700  | -4.62741700 |
| H | -4.55865200 | 1.22296500  | -4.65796400 |
| O | 0.22277600  | -2.16593600 | -0.40777600 |
| O | -4.24331700 | -2.25766100 | 0.67172800  |

**TS<sub>8</sub>-11'**

|    |            |            |             |
|----|------------|------------|-------------|
| Pd | 0.20773700 | 0.32807200 | -0.26344700 |
| C  | 0.76804800 | 3.01718000 | 0.78402800  |
| C  | 0.94956300 | 4.39676100 | 0.64582900  |
| C  | 1.16572100 | 4.96009700 | -0.61538900 |
| C  | 1.20923400 | 4.14650800 | -1.75041900 |
| C  | 1.02793100 | 2.76460500 | -1.63040300 |
| C  | 0.74871500 | 2.22853700 | -0.37009900 |
| H  | 0.63810000 | 2.57235600 | 1.76433000  |
| H  | 0.93896200 | 5.02630800 | 1.53130100  |

|   |             |             |             |
|---|-------------|-------------|-------------|
| H | 1.32767900  | 6.02995600  | -0.70950200 |
| H | 1.40631400  | 4.57872700  | -2.72760000 |
| H | 1.11050900  | 2.12007800  | -2.50092400 |
| C | -0.23974000 | -3.89600300 | -1.53103000 |
| C | -0.17083800 | -4.13272000 | -0.01316200 |
| C | -0.37318700 | -2.74513700 | 0.61189800  |
| C | -0.35631500 | -2.37530400 | -1.68174800 |
| H | 0.64710300  | -4.23559600 | -2.07280500 |
| H | -1.10731700 | -4.36489400 | -2.00589200 |
| H | 0.79943500  | -4.51641700 | 0.31637600  |
| H | -0.93561000 | -4.81244700 | 0.37200000  |
| N | -0.37942600 | -1.80324200 | -0.41649300 |
| S | -1.94987000 | -0.01660100 | 0.13196100  |
| C | -2.88329700 | 0.15926600  | -1.32857200 |
| C | -4.10672600 | -0.54708700 | -1.40883800 |
| C | -2.49000800 | 1.01125100  | -2.38537200 |
| C | -4.92246400 | -0.39058800 | -2.52119000 |
| H | -4.39797100 | -1.20338000 | -0.59479400 |
| C | -3.30989500 | 1.14736100  | -3.49777700 |
| H | -1.55219100 | 1.54979000  | -2.31519200 |
| C | -4.52251800 | 0.45143100  | -3.56656200 |
| H | -5.86427100 | -0.92640100 | -2.58293900 |
| H | -3.00885700 | 1.79715900  | -4.31317800 |
| H | -5.15982100 | 0.56620300  | -4.43831300 |
| O | -0.41979200 | -1.75168200 | -2.72647500 |
| O | -0.50378200 | -2.49653400 | 1.79237800  |
| O | 2.58903400  | 0.36792000  | 1.53923500  |
| O | 2.19246800  | -0.06007700 | -0.65032900 |
| C | 2.92545400  | 0.03697900  | 0.41122800  |
| C | 4.39968700  | -0.33811900 | 0.11283200  |
| F | 4.90841200  | 0.45193900  | -0.85401300 |

|            |             |             |             |
|------------|-------------|-------------|-------------|
| F          | 4.48246000  | -1.61763700 | -0.31182100 |
| F          | 5.17145600  | -0.21246300 | 1.19916600  |
| <b>11'</b> |             |             |             |
| Pd         | 0.26670000  | 0.02401800  | 0.57856300  |
| C          | 0.91779200  | 2.89660600  | 0.29276200  |
| C          | 1.54352100  | 3.99101000  | -0.31719000 |
| C          | 2.22166400  | 3.83525200  | -1.52635900 |
| C          | 2.27894600  | 2.58336000  | -2.13841100 |
| C          | 1.65521700  | 1.47409000  | -1.55297500 |
| C          | 0.99545300  | 1.66654300  | -0.34764300 |
| H          | 0.40302300  | 3.01595300  | 1.23810900  |
| H          | 1.49523700  | 4.96205600  | 0.16723400  |
| H          | 2.70430700  | 4.68931700  | -1.99192000 |
| H          | 2.80295800  | 2.45363800  | -3.08083400 |
| H          | 1.68714100  | 0.50982600  | -2.04137400 |
| C          | -1.20409000 | -2.38576400 | -2.75785900 |
| C          | -1.10427200 | -3.25651200 | -1.49148800 |
| C          | -0.61571100 | -2.27638700 | -0.44155100 |
| C          | -0.72927800 | -0.98066900 | -2.33729400 |
| H          | -0.57775200 | -2.73648300 | -3.58260100 |
| H          | -2.22538900 | -2.29576600 | -3.13760600 |
| H          | -0.39078900 | -4.08140700 | -1.58097800 |
| H          | -2.05928500 | -3.68295400 | -1.17254800 |
| N          | -0.35954500 | -1.05656100 | -0.99875200 |
| S          | -1.81291600 | 0.97492200  | 0.93055900  |
| C          | -3.07045400 | 0.11283200  | 0.03607800  |
| C          | -3.68626400 | -1.01787400 | 0.60712400  |
| C          | -3.53403800 | 0.61238100  | -1.19578500 |
| C          | -4.75181300 | -1.63419100 | -0.04621800 |
| H          | -3.32193000 | -1.39676700 | 1.55608500  |
| C          | -4.59970100 | -0.01110800 | -1.84207700 |



|                           |             |             |             |
|---------------------------|-------------|-------------|-------------|
| H                         | -3.04665400 | 1.47547400  | -1.63573900 |
| C                         | -5.20911400 | -1.13202500 | -1.26905600 |
| H                         | -5.23019300 | -2.50103600 | 0.40024100  |
| H                         | -4.95554200 | 0.37757200  | -2.79151400 |
| H                         | -6.04288500 | -1.61205800 | -1.77351100 |
| O                         | -0.69531100 | 0.00102800  | -3.04930400 |
| O                         | -0.46057100 | -2.44793600 | 0.77309500  |
| O                         | 1.12464700  | 0.69873600  | 2.35492500  |
| O                         | 2.41792100  | -0.62262200 | 1.13851300  |
| C                         | 2.21689700  | 0.05746400  | 2.16657400  |
| C                         | 3.30024400  | 0.19359600  | 3.25035500  |
| F                         | 3.86853000  | 1.41067900  | 3.15717500  |
| F                         | 4.25059700  | -0.73332000 | 3.09951200  |
| F                         | 2.76354700  | 0.06854800  | 4.47309300  |
| <b>TS<sub>8</sub>-12'</b> |             |             |             |
| Pd                        | -0.05188600 | -0.24321200 | -0.61787200 |
| O                         | 2.28515500  | -0.80048300 | 1.35985400  |
| O                         | 1.96401600  | -0.45185700 | -0.85923600 |
| C                         | 2.66550800  | -0.68473300 | 0.20259600  |
| C                         | 4.17056400  | -0.82452400 | -0.14016300 |
| F                         | 4.63274900  | 0.29609800  | -0.73260400 |
| F                         | 4.37042500  | -1.85389900 | -0.99137600 |
| F                         | 4.90937300  | -1.04684300 | 0.95531900  |
| C                         | 0.41824500  | 1.86464500  | 1.30117700  |
| C                         | 0.65415700  | 3.18075700  | 1.69980600  |
| C                         | 0.33815100  | 4.24853800  | 0.85003500  |
| C                         | -0.21759500 | 4.00774900  | -0.40679300 |
| C                         | -0.46828500 | 2.69513000  | -0.82272100 |
| C                         | -0.08134300 | 1.64003600  | 0.01099700  |
| H                         | 0.68413000  | 1.03011400  | 1.94150800  |
| H                         | 1.08826300  | 3.37066300  | 2.67724200  |

|            |             |             |             |
|------------|-------------|-------------|-------------|
| H          | 0.50973300  | 5.26932300  | 1.17898300  |
| H          | -0.47912700 | 4.83537900  | -1.06002300 |
| H          | -0.92750400 | 2.51336800  | -1.78895400 |
| C          | -1.18548200 | -4.33334000 | 0.38034400  |
| C          | -1.35746100 | -4.41397200 | -1.14524200 |
| C          | -1.25277700 | -2.96631800 | -1.63839400 |
| C          | -1.17859400 | -2.83566000 | 0.69635200  |
| H          | -1.98098500 | -4.81735100 | 0.95210900  |
| H          | -0.23469900 | -4.75421100 | 0.72229700  |
| H          | -2.33394800 | -4.80582700 | -1.44763100 |
| H          | -0.59735800 | -5.01558100 | -1.65008500 |
| N          | -1.07029100 | -2.14085300 | -0.52073900 |
| S          | -2.35301600 | -0.15247600 | -0.44132400 |
| C          | -3.06661700 | 0.12006700  | -2.01475800 |
| C          | -4.47363600 | 0.01500400  | -2.09945900 |
| C          | -2.31972000 | 0.46212100  | -3.16327000 |
| C          | -5.11696800 | 0.27687400  | -3.30321800 |
| H          | -5.04362700 | -0.26334000 | -1.21850900 |
| C          | -2.97482900 | 0.70305300  | -4.36390500 |
| H          | -1.23768000 | 0.50483800  | -3.10405000 |
| C          | -4.37051700 | 0.61859200  | -4.43605400 |
| H          | -6.19847600 | 0.20585000  | -3.36329500 |
| H          | -2.39840700 | 0.95458900  | -5.24853000 |
| H          | -4.87546600 | 0.81417800  | -5.37718400 |
| O          | -1.25392800 | -2.31422100 | 1.78541800  |
| O          | -1.30088800 | -2.58790300 | -2.78993100 |
| <b>12'</b> |             |             |             |
| Pd         | -0.01624800 | -0.13237000 | 0.38278700  |
| O          | 2.11583700  | 0.22361800  | 2.58030300  |
| O          | 2.00180600  | -0.24251300 | 0.35600200  |
| C          | 2.59570700  | -0.06360400 | 1.49234300  |

|   |             |             |             |
|---|-------------|-------------|-------------|
| C | 4.12869700  | -0.24818400 | 1.33863400  |
| F | 4.41876700  | -1.48077100 | 0.87875900  |
| F | 4.76008600  | -0.08026600 | 2.50793200  |
| F | 4.62755400  | 0.65055100  | 0.46405400  |
| C | -0.41389200 | 1.79089300  | 1.88209900  |
| C | 0.48283500  | 2.86367600  | 2.06096700  |
| C | 0.37649700  | 3.99915600  | 1.27359600  |
| C | -0.62180200 | 4.08287700  | 0.28670800  |
| C | -1.49823000 | 3.03028000  | 0.06288200  |
| C | -1.39252400 | 1.88183400  | 0.86511100  |
| H | -0.39590100 | 0.96981900  | 2.59529300  |
| H | 1.24738000  | 2.77165900  | 2.82380700  |
| H | 1.06234400  | 4.82789200  | 1.41707000  |
| H | -0.70163900 | 4.97734700  | -0.32397600 |
| H | -2.24333100 | 3.08303600  | -0.72225300 |
| C | 0.43531400  | -3.53501700 | -2.19419400 |
| C | 0.25750600  | -4.23445100 | -0.83779000 |
| C | 0.00245900  | -3.09491700 | 0.15646600  |
| C | 0.20935300  | -2.04891300 | -1.89722500 |
| H | 1.43935100  | -3.65125200 | -2.61347000 |
| H | -0.27373700 | -3.86155000 | -2.96036100 |
| H | 1.13905200  | -4.79249700 | -0.51031100 |
| H | -0.59038700 | -4.92544600 | -0.81034000 |
| N | -0.01687900 | -1.90043400 | -0.54717800 |
| S | -2.31122400 | 0.35436900  | 0.58917500  |
| C | -3.16701500 | 0.61111400  | -0.97229800 |
| C | -4.52998800 | 0.92801200  | -0.89739600 |
| C | -2.51922300 | 0.45536200  | -2.20334400 |
| C | -5.25078700 | 1.11285200  | -2.07698500 |
| H | -5.01831700 | 1.02614800  | 0.06733100  |
| C | -3.25925100 | 0.64080100  | -3.37313500 |

|                                     |             |             |             |
|-------------------------------------|-------------|-------------|-------------|
| H                                   | -1.47037000 | 0.17171500  | -2.26018300 |
| C                                   | -4.61501500 | 0.97053600  | -3.31271300 |
| H                                   | -6.30636100 | 1.36173200  | -2.02839500 |
| H                                   | -2.76718500 | 0.51631000  | -4.33269800 |
| H                                   | -5.18017700 | 1.10893700  | -4.22965300 |
| O                                   | 0.20932800  | -1.14636800 | -2.72407800 |
| O                                   | -0.17006300 | -3.20884800 | 1.35634200  |
| <b>TS<sub>8</sub><sup>-13</sup></b> |             |             |             |
| Pd                                  | 0.25932500  | -0.58970300 | -0.55637700 |
| O                                   | 2.43080000  | -0.38295600 | 1.45167500  |
| O                                   | 2.29981100  | -0.40032500 | -0.81018200 |
| C                                   | 2.91088300  | -0.34465900 | 0.32231300  |
| C                                   | 4.44250600  | -0.19596500 | 0.14180500  |
| F                                   | 4.73403700  | 0.96557100  | -0.48622000 |
| F                                   | 4.94489600  | -1.20182800 | -0.60394700 |
| F                                   | 5.08630400  | -0.19618600 | 1.31865700  |
| C                                   | -0.24943700 | 1.70671800  | 1.24680800  |
| C                                   | 0.13457800  | 3.00767200  | 1.56294600  |
| C                                   | 0.22099600  | 3.97001200  | 0.55279700  |
| C                                   | -0.07517000 | 3.64087300  | -0.77529700 |
| C                                   | -0.45480000 | 2.34162900  | -1.09970900 |
| C                                   | -0.52748300 | 1.35876400  | -0.09231300 |
| H                                   | -0.31255800 | 0.95462500  | 2.02669700  |
| H                                   | 0.36979200  | 3.26978100  | 2.58978700  |
| H                                   | 0.51636000  | 4.98552400  | 0.80109000  |
| H                                   | -0.00603000 | 4.39674100  | -1.55195200 |
| H                                   | -0.69065000 | 2.08891800  | -2.12799300 |
| C                                   | -1.42352100 | -4.61457500 | -0.81487300 |
| C                                   | -2.94333700 | -4.61144400 | -0.56930800 |
| C                                   | -3.30086500 | -3.13099500 | -0.37708900 |
| C                                   | -1.03137900 | -3.14586600 | -0.73553500 |

|            |             |             |             |
|------------|-------------|-------------|-------------|
| H          | -0.85422200 | -5.17261600 | -0.06598800 |
| H          | -1.13480000 | -5.00600300 | -1.79473400 |
| H          | -3.24194900 | -5.16744000 | 0.32383200  |
| H          | -3.52210400 | -5.01195200 | -1.40630000 |
| N          | -2.12338800 | -2.38173900 | -0.50627500 |
| S          | -1.89002900 | -0.32279400 | -0.23492600 |
| C          | -2.76491800 | 0.08271800  | -1.75366800 |
| C          | -4.10832800 | 0.45059700  | -1.62938300 |
| C          | -2.15178700 | 0.00105200  | -3.01002700 |
| C          | -4.83908700 | 0.75797700  | -2.77798900 |
| H          | -4.57777500 | 0.47710600  | -0.65201500 |
| C          | -2.89496200 | 0.30571000  | -4.14989000 |
| H          | -1.11016900 | -0.29646900 | -3.08721300 |
| C          | -4.23483900 | 0.68749800  | -4.03419600 |
| H          | -5.88243900 | 1.04397500  | -2.68845900 |
| H          | -2.42592300 | 0.24662300  | -5.12737000 |
| H          | -4.80804500 | 0.92574400  | -4.92513900 |
| O          | 0.14001900  | -2.73262700 | -0.86692700 |
| O          | -4.39489000 | -2.66223800 | -0.15318800 |
| <b>13'</b> |             |             |             |
| Pd         | 0.36557000  | -0.01324300 | 0.34526500  |
| O          | 2.63206600  | 0.33572700  | 2.36750000  |
| O          | 2.37839700  | -0.23284400 | 0.18353800  |
| C          | 3.04536100  | -0.01170400 | 1.26705100  |
| C          | 4.56621400  | -0.21118600 | 1.03555800  |
| F          | 5.02147600  | 0.69187900  | 0.13894500  |
| F          | 4.82912400  | -1.44054000 | 0.55628700  |
| F          | 5.25959500  | -0.04863900 | 2.17046200  |
| C          | 0.21511300  | 2.07888300  | 1.51138200  |
| C          | 1.21576900  | 3.07525400  | 1.48597700  |
| C          | 1.14303500  | 4.10768500  | 0.56744700  |

|   |             |             |             |
|---|-------------|-------------|-------------|
| C | 0.07165600  | 4.16707000  | -0.34496300 |
| C | -0.90362900 | 3.18181800  | -0.37338300 |
| C | -0.83717500 | 2.12751200  | 0.55752100  |
| H | 0.19586600  | 1.38885600  | 2.35292800  |
| H | 2.02590300  | 3.00831000  | 2.20333200  |
| H | 1.90513400  | 4.88023800  | 0.55314000  |
| H | 0.01275300  | 4.99153600  | -1.04959800 |
| H | -1.70510600 | 3.21665400  | -1.10158900 |
| C | -0.92201700 | -4.06443700 | -0.53911900 |
| C | -2.40883400 | -4.40219200 | -0.37464000 |
| C | -3.04360200 | -3.05561400 | 0.03349300  |
| C | -0.88900300 | -2.58141200 | -0.17521800 |
| H | -0.25609000 | -4.61887000 | 0.12881900  |
| H | -0.54174200 | -4.20033600 | -1.55624900 |
| H | -2.60362100 | -5.14385000 | 0.40559300  |
| H | -2.88273400 | -4.76653200 | -1.29040500 |
| N | -2.05547100 | -2.07006800 | 0.14802700  |
| S | -1.84510700 | 0.62861900  | 0.56035400  |
| C | -2.71104300 | 0.68906100  | -1.01502500 |
| C | -4.10629900 | 0.64178500  | -0.96312800 |
| C | -2.03078100 | 0.71289800  | -2.23780400 |
| C | -4.83057100 | 0.64790300  | -2.15635700 |
| H | -4.61740700 | 0.57308900  | -0.00900900 |
| C | -2.76719200 | 0.72202900  | -3.42136400 |
| H | -0.94567100 | 0.71014900  | -2.26275100 |
| C | -4.16431100 | 0.69278300  | -3.38137800 |
| H | -5.91452400 | 0.60517900  | -2.12345800 |
| H | -2.24764400 | 0.74087300  | -4.37454400 |
| H | -4.73177900 | 0.69273500  | -4.30708500 |
| O | 0.23492500  | -1.96220400 | -0.22037000 |
| O | -4.22926400 | -2.86696300 | 0.22259100  |

TS<sub>13'-12'</sub>

|    |             |             |             |
|----|-------------|-------------|-------------|
| Pd | 0.47419800  | 0.10931300  | -0.13225600 |
| O  | 2.70077800  | 0.25510600  | 2.04680600  |
| O  | 2.46323000  | 0.24567100  | -0.21776800 |
| C  | 3.12027800  | 0.23631000  | 0.90099000  |
| C  | 4.64722600  | 0.19714100  | 0.62133600  |
| F  | 4.98243000  | -0.94538400 | -0.00917700 |
| F  | 5.34933900  | 0.26857700  | 1.75898700  |
| F  | 5.01917900  | 1.22996100  | -0.16302000 |
| C  | -0.01847000 | 1.66189000  | 1.65878500  |
| C  | 0.85994600  | 2.71188500  | 2.00888500  |
| C  | 0.79603300  | 3.92455000  | 1.34555200  |
| C  | -0.14056400 | 4.12511300  | 0.31113400  |
| C  | -0.99741500 | 3.11090800  | -0.08218500 |
| C  | -0.92938400 | 1.87382200  | 0.58952700  |
| H  | -0.07746000 | 0.78525500  | 2.29772900  |
| H  | 1.57349000  | 2.54052300  | 2.80599800  |
| H  | 1.46464400  | 4.73206600  | 1.62631000  |
| H  | -0.18314600 | 5.08340600  | -0.19773100 |
| H  | -1.69744100 | 3.25236200  | -0.89735300 |
| C  | 0.95200800  | -3.55748700 | -2.16622300 |
| C  | 0.97658800  | -4.54113000 | -0.98405800 |
| C  | 0.70431400  | -3.65479200 | 0.25518600  |
| C  | 0.71135500  | -2.22655900 | -1.47144200 |
| H  | 1.88988100  | -3.50981100 | -2.72808000 |
| H  | 0.15297900  | -3.75152400 | -2.88924400 |
| H  | 1.94118800  | -5.04153200 | -0.85816200 |
| H  | 0.21433000  | -5.32298900 | -1.04473600 |
| N  | 0.59074000  | -2.32326000 | -0.15370800 |
| S  | -1.84410100 | 0.39258600  | 0.13029000  |
| C  | -2.67660400 | 0.82467100  | -1.40586600 |

|   |             |             |             |
|---|-------------|-------------|-------------|
| C | -3.97968900 | 1.33043400  | -1.31138900 |
| C | -2.06808900 | 0.60016000  | -2.64591900 |
| C | -4.67232800 | 1.64403700  | -2.48055600 |
| H | -4.44442800 | 1.47520500  | -0.34078200 |
| C | -2.78071700 | 0.91284100  | -3.80557300 |
| H | -1.07208000 | 0.17101600  | -2.70063600 |
| C | -4.07253800 | 1.43665400  | -3.72522700 |
| H | -5.68019900 | 2.04240300  | -2.41736600 |
| H | -2.32066100 | 0.74077400  | -4.77370400 |
| H | -4.61729500 | 1.67620100  | -4.63349100 |
| O | 0.63179600  | -1.10709700 | -2.05846600 |
| O | 0.59921100  | -4.06439200 | 1.39263900  |

**TS<sub>12'-14en</sub>**

|    |             |            |             |
|----|-------------|------------|-------------|
| Pd | 0.46363600  | 0.45960000 | -0.60113200 |
| O  | 2.27973900  | 1.90117600 | 1.08257900  |
| O  | 2.38035400  | 1.00093600 | -0.98414700 |
| C  | 2.86347500  | 1.62410200 | 0.03790500  |
| C  | 4.33946700  | 2.03725500 | -0.17409000 |
| F  | 4.83647700  | 2.64034600 | 0.91348300  |
| F  | 4.44289000  | 2.89234700 | -1.21148000 |
| F  | 5.10164300  | 0.96022000 | -0.44316500 |
| C  | -0.77537600 | 2.28307600 | 1.10307400  |
| C  | -0.61556800 | 3.66466800 | 1.27495000  |
| C  | -1.46948100 | 4.55079600 | 0.62658000  |
| C  | -2.48380900 | 4.06430600 | -0.20972800 |
| C  | -2.64099600 | 2.69743100 | -0.42025400 |
| C  | -1.78098800 | 1.81171500 | 0.24004500  |
| H  | -0.14086100 | 1.60227400 | 1.66537700  |
| H  | 0.17934100  | 4.02308600 | 1.91984400  |
| H  | -1.35235800 | 5.62068100 | 0.76719700  |
| H  | -3.15144600 | 4.75861300 | -0.71116600 |



|   |             |             |             |
|---|-------------|-------------|-------------|
| H | -3.40861300 | 2.32507700  | -1.08875100 |
| C | 1.66359400  | -3.35497300 | -2.10573800 |
| C | 1.52511500  | -2.57380300 | -3.42191500 |
| C | 0.93425400  | -1.22034900 | -3.01370500 |
| C | 1.21955100  | -2.37013200 | -1.01773900 |
| H | 1.02738400  | -4.24392700 | -2.05777400 |
| H | 2.68552300  | -3.67749200 | -1.88842000 |
| H | 0.86731400  | -3.04826900 | -4.15550400 |
| H | 2.48322000  | -2.39038800 | -3.91778400 |
| N | 0.81080900  | -1.19930600 | -1.63871000 |
| S | -1.75982000 | 0.02574000  | -0.02041300 |
| C | -2.84843900 | -0.23985800 | -1.42769700 |
| C | -4.13990700 | -0.70233000 | -1.14303600 |
| C | -2.42421700 | -0.03050500 | -2.74481800 |
| C | -5.02568600 | -0.94021600 | -2.19412200 |
| H | -4.44510700 | -0.87573400 | -0.11567900 |
| C | -3.32263100 | -0.27885100 | -3.78433400 |
| H | -1.40910900 | 0.28729700  | -2.96634800 |
| C | -4.61726800 | -0.72720000 | -3.51266300 |
| H | -6.02875100 | -1.29667800 | -1.98115300 |
| H | -2.99828900 | -0.12728700 | -4.80914100 |
| H | -5.30654600 | -0.91946000 | -4.32952100 |
| O | 1.20712100  | -2.57468700 | 0.18204100  |
| O | 0.60706400  | -0.32078800 | -3.77252000 |

**TS<sub>13'-14'</sub>**

|    |            |            |             |
|----|------------|------------|-------------|
| Pd | 0.42914100 | 0.23884400 | -0.15258300 |
| O  | 2.21779800 | 1.80707300 | 1.31323300  |
| O  | 2.40799400 | 0.54348800 | -0.53461600 |
| C  | 2.86337800 | 1.32524500 | 0.38113600  |
| C  | 4.36857400 | 1.63815600 | 0.21978000  |
| F  | 4.60937600 | 2.18418000 | -0.98843700 |

|   |             |             |             |
|---|-------------|-------------|-------------|
| F | 5.09791400  | 0.51127900  | 0.32284600  |
| F | 4.78892300  | 2.49727600  | 1.15734600  |
| C | -0.76831000 | 2.51141900  | 1.04276100  |
| C | -0.54656700 | 3.89368300  | 1.00515100  |
| C | -1.36155200 | 4.70641000  | 0.22368500  |
| C | -2.39705100 | 4.14024000  | -0.53276500 |
| C | -2.60845500 | 2.76436600  | -0.53675500 |
| C | -1.78553600 | 1.94620000  | 0.24992100  |
| H | -0.16885600 | 1.90185500  | 1.71518300  |
| H | 0.25797900  | 4.31394900  | 1.59908400  |
| H | -1.20228600 | 5.78002500  | 0.20391000  |
| H | -3.04166100 | 4.77838200  | -1.13004900 |
| H | -3.39680900 | 2.33243000  | -1.14155600 |
| C | 0.32871400  | -3.99813000 | -1.07975200 |
| C | -0.84096900 | -4.83843300 | -0.55189700 |
| C | -1.76827800 | -3.79493000 | 0.10688400  |
| C | -0.04508300 | -2.60079500 | -0.58809100 |
| H | 1.30720000  | -4.27831700 | -0.67911200 |
| H | 0.41637800  | -3.99220800 | -2.17058400 |
| H | -0.53915500 | -5.57526300 | 0.19854800  |
| H | -1.38783800 | -5.37609300 | -1.33102300 |
| N | -1.16981800 | -2.52880100 | 0.07905800  |
| S | -1.84646500 | 0.14138900  | 0.31995000  |
| C | -2.81534400 | -0.29902700 | -1.13310900 |
| C | -3.93631800 | -1.10631300 | -0.91948300 |
| C | -2.44554700 | 0.10274400  | -2.42153400 |
| C | -4.71167100 | -1.49163800 | -2.01399900 |
| H | -4.16786700 | -1.46924300 | 0.07575500  |
| C | -3.23149700 | -0.28843100 | -3.50550900 |
| H | -1.55620500 | 0.70502500  | -2.57673900 |
| C | -4.36499400 | -1.08016900 | -3.30209600 |

|            |             |             |             |
|------------|-------------|-------------|-------------|
| H          | -5.57864400 | -2.12520800 | -1.85594700 |
| H          | -2.95164800 | 0.01970300  | -4.50832800 |
| H          | -4.97047500 | -1.38570300 | -4.15017500 |
| O          | 0.73998500  | -1.62228600 | -0.87086700 |
| O          | -2.86853300 | -4.02431700 | 0.57002400  |
| <b>14'</b> |             |             |             |
| Pd         | 0.89330800  | -0.24813500 | -0.04109800 |
| O          | 1.78970400  | 1.49249200  | 0.69774000  |
| O          | 3.04656200  | -0.05586900 | -0.23983600 |
| C          | 2.92862100  | 1.06634700  | 0.32007400  |
| C          | 4.16292000  | 1.96251300  | 0.50323400  |
| F          | 4.40731800  | 2.61647600  | -0.64791600 |
| F          | 5.23798900  | 1.22708400  | 0.81190300  |
| F          | 3.96256400  | 2.86528600  | 1.47109400  |
| C          | -1.09442700 | 2.51361200  | 1.80610200  |
| C          | -1.17446500 | 3.89858800  | 1.94234400  |
| C          | -1.63477300 | 4.68196300  | 0.88264000  |
| C          | -2.01370300 | 4.07624200  | -0.31704900 |
| C          | -1.92894500 | 2.69183100  | -0.46913600 |
| C          | -1.46711400 | 1.91337100  | 0.59651100  |
| H          | -0.74303700 | 1.90323300  | 2.63248300  |
| H          | -0.88130600 | 4.36205900  | 2.87925400  |
| H          | -1.70180200 | 5.76009600  | 0.99213100  |
| H          | -2.37774300 | 4.68120300  | -1.14214900 |
| H          | -2.23048500 | 2.22971600  | -1.40161700 |
| C          | -0.11930500 | -4.30986600 | -1.12237500 |
| C          | -1.13720900 | -5.07476300 | -0.26987000 |
| C          | -1.66262700 | -4.00480000 | 0.71500200  |
| C          | -0.14038300 | -2.93476000 | -0.46347400 |
| H          | 0.89525000  | -4.71873900 | -1.09542600 |
| H          | -0.40162100 | -4.21801600 | -2.17618400 |

|   |             |             |             |
|---|-------------|-------------|-------------|
| H | -0.69414400 | -5.89811200 | 0.29829700  |
| H | -1.97303800 | -5.48846600 | -0.84028800 |
| N | -0.96457400 | -2.79880900 | 0.54276700  |
| S | -1.32164100 | 0.10685900  | 0.56333400  |
| C | -2.41205000 | -0.37288400 | -0.78626400 |
| C | -3.67100700 | -0.86893900 | -0.43304300 |
| C | -2.02318100 | -0.28435600 | -2.12715500 |
| C | -4.55680700 | -1.25810500 | -1.43810000 |
| H | -3.94094000 | -0.97368200 | 0.61226600  |
| C | -2.91903100 | -0.67707100 | -3.12322600 |
| H | -1.03185100 | 0.07161200  | -2.38683800 |
| C | -4.18397500 | -1.15955400 | -2.78022500 |
| H | -5.53295900 | -1.64903100 | -1.16848600 |
| H | -2.62302900 | -0.61037100 | -4.16579900 |
| H | -4.87525200 | -1.46793100 | -3.55885100 |
| O | 0.61993200  | -2.00834500 | -0.94145300 |
| O | -2.55945400 | -4.17823000 | 1.51447200  |

**TS<sub>14'</sub>-14en**

|    |             |             |             |
|----|-------------|-------------|-------------|
| Pd | 0.34325900  | -0.36942600 | -0.65321900 |
| O  | 1.12063600  | 1.58581200  | -1.26987800 |
| O  | 2.35457400  | -0.23965300 | -1.21706600 |
| C  | 2.22755100  | 1.00170700  | -1.44223300 |
| C  | 3.43347300  | 1.78609100  | -1.98143500 |
| F  | 3.30226100  | 3.09484100  | -1.72889800 |
| F  | 3.51374100  | 1.61545000  | -3.31481000 |
| F  | 4.57107300  | 1.34930100  | -1.42770500 |
| C  | -2.71135900 | 1.12942200  | 2.11172700  |
| C  | -2.81969900 | 2.22613700  | 2.96807500  |
| C  | -2.25995900 | 3.45244400  | 2.60716800  |
| C  | -1.58539500 | 3.58776000  | 1.39016000  |
| C  | -1.46440900 | 2.50048900  | 0.52619000  |

|                        |             |             |             |
|------------------------|-------------|-------------|-------------|
| C                      | -2.03812200 | 1.27601800  | 0.89404000  |
| H                      | -3.13664600 | 0.16970700  | 2.38706000  |
| H                      | -3.33750300 | 2.11773000  | 3.91587200  |
| H                      | -2.34277300 | 4.30306100  | 3.27697500  |
| H                      | -1.14065500 | 4.53924000  | 1.11541100  |
| H                      | -0.91943500 | 2.59587800  | -0.40587300 |
| C                      | 0.10113000  | -4.45347200 | 0.49651200  |
| C                      | 0.50181400  | -4.34238600 | 1.97763700  |
| C                      | 0.63513200  | -2.81996600 | 2.22390100  |
| C                      | 0.10679200  | -2.99941500 | 0.05189900  |
| H                      | 0.80159200  | -5.02954600 | -0.11579800 |
| H                      | -0.89308600 | -4.88397100 | 0.33814600  |
| H                      | 1.45823500  | -4.82312800 | 2.20391200  |
| H                      | -0.23726300 | -4.75852600 | 2.66796000  |
| N                      | 0.40723300  | -2.14472000 | 1.02345600  |
| S                      | -1.88264700 | -0.19768900 | -0.12285800 |
| C                      | -2.67479100 | 0.23589100  | -1.69197000 |
| C                      | -3.57925500 | 1.29463200  | -1.80690000 |
| C                      | -2.40817300 | -0.60899100 | -2.77825200 |
| C                      | -4.20967700 | 1.51813300  | -3.03256900 |
| H                      | -3.79014000 | 1.93791700  | -0.96045700 |
| C                      | -3.04658300 | -0.36948500 | -3.99441100 |
| H                      | -1.71381400 | -1.43693900 | -2.67006400 |
| C                      | -3.94391900 | 0.69295900  | -4.12595600 |
| H                      | -4.91018100 | 2.34242000  | -3.12745300 |
| H                      | -2.83712700 | -1.01644900 | -4.84078400 |
| H                      | -4.43542400 | 0.87549600  | -5.07666300 |
| O                      | -0.14482500 | -2.59133300 | -1.11766700 |
| O                      | 0.89040700  | -2.30907000 | 3.29544300  |
| <b>14<sub>en</sub></b> |             |             |             |
| Pd                     | 0.48233500  | -0.53938100 | 0.06657200  |

|   |             |             |             |
|---|-------------|-------------|-------------|
| O | 1.15436400  | 1.04122400  | -1.19431200 |
| O | 2.52420100  | -0.58679900 | -0.60604500 |
| C | 2.30321100  | 0.49716500  | -1.21109600 |
| C | 3.44955400  | 1.21552700  | -1.94030200 |
| F | 4.42241900  | 0.36126600  | -2.27217100 |
| F | 3.96361000  | 2.15961000  | -1.12862000 |
| F | 2.99989800  | 1.81440600  | -3.05268600 |
| C | -0.96516600 | 2.52421600  | 0.94928400  |
| C | -1.08299600 | 3.74075300  | 1.62241800  |
| C | -2.07615300 | 3.92179200  | 2.58824100  |
| C | -2.96068400 | 2.88439000  | 2.88732000  |
| C | -2.85459700 | 1.66194000  | 2.22252800  |
| C | -1.85934300 | 1.48979300  | 1.25353600  |
| H | -0.19135200 | 2.38130700  | 0.20293900  |
| H | -0.39081400 | 4.54532200  | 1.39376900  |
| H | -2.15682200 | 4.87015400  | 3.11092900  |
| H | -3.73019600 | 3.02083700  | 3.64089100  |
| H | -3.53358600 | 0.84760200  | 2.45507800  |
| C | 0.80171900  | -3.70758400 | 2.93505400  |
| C | -0.18575400 | -4.34977600 | 1.94921300  |
| C | -0.43309900 | -3.27122500 | 0.88962500  |
| C | 1.02856500  | -2.29273300 | 2.38968500  |
| H | 0.42296500  | -3.63914900 | 3.95869000  |
| H | 1.76648400  | -4.22133600 | 2.98263000  |
| H | -1.14311300 | -4.62422900 | 2.40237700  |
| H | 0.20358500  | -5.24514800 | 1.45589700  |
| N | 0.31729100  | -2.16093100 | 1.20384500  |
| S | -1.76474800 | -0.13439900 | 0.47861200  |
| C | -2.47002800 | 0.09824900  | -1.17681600 |
| C | -2.57085500 | -1.06097100 | -1.95767900 |
| C | -2.93025900 | 1.33110300  | -1.64210300 |

|   |             |             |             |
|---|-------------|-------------|-------------|
| C | -3.13848700 | -0.96729600 | -3.22746700 |
| H | -2.20138900 | -2.00778000 | -1.57306400 |
| C | -3.50006100 | 1.40220400  | -2.91546900 |
| H | -2.85040500 | 2.22219500  | -1.03089000 |
| C | -3.60357000 | 0.25938600  | -3.70866500 |
| H | -3.21669800 | -1.85998700 | -3.84068100 |
| H | -3.85997000 | 2.35823500  | -3.28385200 |
| H | -4.04490700 | 0.32363200  | -4.69868900 |
| O | 1.70803800  | -1.42121500 | 2.90009300  |
| O | -1.18338100 | -3.37550800 | -0.07273100 |

**TS<sub>14en-15</sub>**

|    |             |             |             |
|----|-------------|-------------|-------------|
| Pd | 0.78063500  | -0.34859500 | -0.53390000 |
| O  | 1.07603300  | 1.66934300  | -0.87508500 |
| O  | 1.79448200  | 0.26426600  | -2.41560000 |
| C  | 1.63798000  | 1.43888100  | -1.99755900 |
| C  | 2.16766300  | 2.62417900  | -2.81935200 |
| F  | 3.47384300  | 2.80222700  | -2.55007100 |
| F  | 1.51244900  | 3.75125400  | -2.51367200 |
| F  | 2.03146500  | 2.38494400  | -4.12949800 |
| C  | -3.08507800 | 0.55922100  | 2.11181000  |
| C  | -3.22625500 | 1.34170600  | 3.26063600  |
| C  | -2.55339700 | 2.55909900  | 3.36496700  |
| C  | -1.72747300 | 2.99201600  | 2.32296800  |
| C  | -1.56332900 | 2.21043600  | 1.18059100  |
| C  | -2.25231800 | 0.99308100  | 1.07274300  |
| H  | -3.61743000 | -0.38229800 | 2.01924600  |
| H  | -3.86790200 | 0.99978700  | 4.06711000  |
| H  | -2.66735900 | 3.16844800  | 4.25655300  |
| H  | -1.19413400 | 3.93434500  | 2.40583900  |
| H  | -0.89887000 | 2.53109300  | 0.38580700  |
| C  | 1.86403600  | -4.46060700 | -0.79608500 |

|   |             |             |             |
|---|-------------|-------------|-------------|
| C | 0.58709200  | -4.48393600 | -1.64640300 |
| C | 0.01963400  | -3.06687100 | -1.53770500 |
| C | 1.87377600  | -3.07591000 | -0.14815900 |
| H | 1.89961400  | -5.22631800 | -0.01631000 |
| H | 2.77800900  | -4.56414000 | -1.38890400 |
| H | -0.16361200 | -5.19076900 | -1.27823700 |
| H | 0.75526200  | -4.71508100 | -2.70126600 |
| N | 0.73449000  | -2.36213900 | -0.56118000 |
| S | -2.01646600 | -0.11778400 | -0.31778200 |
| C | -2.47500900 | 0.85792900  | -1.76310100 |
| C | -3.29399600 | 1.98874200  | -1.67714100 |
| C | -2.03228300 | 0.39553900  | -3.01009500 |
| C | -3.65229200 | 2.66727600  | -2.84343500 |
| H | -3.64845000 | 2.34135000  | -0.71531500 |
| C | -2.40542000 | 1.08120000  | -4.16616300 |
| H | -1.42006100 | -0.49829400 | -3.06935200 |
| C | -3.20977900 | 2.22020200  | -4.08893900 |
| H | -4.28437700 | 3.54779400  | -2.77193200 |
| H | -2.05898900 | 0.72119400  | -5.13054400 |
| H | -3.49103700 | 2.75336100  | -4.99204200 |
| O | 2.70971200  | -2.64245600 | 0.62045700  |
| O | -0.90753900 | -2.62003100 | -2.18677300 |
| C | 0.20108700  | -0.92032600 | 4.00299800  |
| F | 0.94523100  | -1.85825200 | 4.60856000  |
| F | -1.07212900 | -1.05531600 | 4.40933100  |
| F | 0.64461100  | 0.28388400  | 4.35715200  |
| C | 0.28515000  | -1.10139300 | 2.47269900  |
| O | 0.79314400  | -0.24710200 | 1.76423100  |
| O | -0.24767300 | -2.23399100 | 2.07996100  |
| H | -0.08921900 | -2.33715400 | 1.10097300  |



|    |             |             |             |
|----|-------------|-------------|-------------|
| Pd | 0.72949000  | -0.56682300 | -0.02016800 |
| O  | 1.83511100  | 0.91428800  | -0.93919000 |
| O  | 2.71348100  | -1.11308900 | -0.99383200 |
| C  | 2.75419200  | 0.10078900  | -1.29774700 |
| C  | 3.89589400  | 0.64200800  | -2.17321400 |
| F  | 4.10328000  | 1.94601100  | -1.94229200 |
| F  | 3.57117500  | 0.48700900  | -3.47104000 |
| F  | 5.03336300  | -0.02356700 | -1.93832700 |
| C  | -1.00548900 | 2.66544100  | -1.09712100 |
| C  | -1.40093200 | 3.96257400  | -0.77146200 |
| C  | -2.73705700 | 4.24149500  | -0.46945000 |
| C  | -3.68643600 | 3.21922900  | -0.49844800 |
| C  | -3.30409500 | 1.91883100  | -0.83618700 |
| C  | -1.96406300 | 1.64231800  | -1.13594800 |
| H  | 0.03461800  | 2.44531900  | -1.31021300 |
| H  | -0.65887200 | 4.75509200  | -0.74346300 |
| H  | -3.03589200 | 5.25346300  | -0.21184800 |
| H  | -4.72639800 | 3.43098200  | -0.26773600 |
| H  | -4.03939000 | 1.12110700  | -0.87313000 |
| C  | 0.14543400  | -4.17830800 | 2.19237600  |
| C  | -0.55396000 | -4.56539900 | 0.88350200  |
| C  | -0.50403300 | -3.29811700 | 0.02654100  |
| C  | 0.45761800  | -2.68831400 | 2.03906100  |
| H  | -0.46425600 | -4.32853200 | 3.08776800  |
| H  | 1.08815800  | -4.70991700 | 2.35298800  |
| H  | -1.60048400 | -4.85632500 | 1.01955400  |
| H  | -0.06403400 | -5.37642000 | 0.33838100  |
| N  | -0.01495900 | -2.24390100 | 0.79679100  |
| S  | -1.52517800 | -0.06615300 | -1.47989400 |
| C  | -0.94791400 | -0.03727100 | -3.19107800 |
| C  | -0.25946100 | -1.16990300 | -3.64679500 |

|   |             |             |             |
|---|-------------|-------------|-------------|
| C | -1.21712500 | 1.02555100  | -4.05893300 |
| C | 0.16781100  | -1.22258600 | -4.97301600 |
| H | -0.07768800 | -1.99934500 | -2.97145300 |
| C | -0.77815000 | 0.95813500  | -5.38292000 |
| H | -1.75997500 | 1.89740100  | -3.71282900 |
| C | -0.08399300 | -0.16035300 | -5.84429200 |
| H | 0.70484800  | -2.09981200 | -5.32183000 |
| H | -0.98482000 | 1.78783500  | -6.05294700 |
| H | 0.25750900  | -0.20483300 | -6.87405400 |
| O | 1.01146500  | -1.98263700 | 2.86092800  |
| O | -0.84235300 | -3.22133300 | -1.14192500 |
| C | -1.49836800 | 1.54860300  | 3.43436100  |
| C | -1.05233000 | 0.61100700  | 2.34886700  |
| O | -0.06450500 | 0.82195700  | 1.64898400  |
| O | -1.82365500 | -0.46458000 | 2.22528200  |
| H | -1.40071800 | -1.07997400 | 1.58188000  |
| H | -2.57988100 | 1.69553700  | 3.38699000  |
| H | -1.26322800 | 1.09783500  | 4.40411700  |
| H | -0.97494600 | 2.49876100  | 3.33949100  |
